# 1 **Causes and consequences of child growth faltering in low- and middle-income** 2 **countries**

3 Andrew Mertens,<sup>1\*</sup> Jade Benjamin-Chung,<sup>2</sup> John M Colford Jr,<sup>1</sup> Jeremy Coyle<sup>1</sup>, Mark J van der Laan,<sup>1</sup>  
4 Alan E Hubbard,<sup>1</sup> Sonali Rosete,<sup>1</sup> Ivana Malenica,<sup>1</sup> Nima Hejazi,<sup>1</sup> Oleg Sofrygin,<sup>1</sup> Wilson Cai,<sup>1</sup> Haodong Li,<sup>1</sup>  
5 Anna Nguyen,<sup>1</sup> Nolan N Pokpongkiat,<sup>1</sup> Stephanie Djajadi,<sup>1</sup> Anmol Seth,<sup>1</sup> Esther Jung,<sup>1</sup> Esther O Chung,<sup>1</sup>  
6 Wendy Jilek,<sup>1</sup> Vishak Subramoney,<sup>3</sup> Ryan Hafen,<sup>4</sup> Jonas Häggström,<sup>5</sup> Thea Norman,<sup>6</sup> Kenneth H Brown,<sup>7</sup>  
7 Parul Christian,<sup>8</sup> Benjamin F. Arnold,<sup>9,10\*</sup> and members of the *ki* Child Growth Consortium\*\*  
8

9 <sup>1</sup> Division of Epidemiology & Biostatistics, University of California, Berkeley, 2121 Berkeley Way Rm 5302  
10 Berkeley, CA 94720-7360

11 <sup>2</sup> Department of Epidemiology & Population Health, Stanford University, Stanford University, 259  
12 Campus Drive, HRP Redwood Building T152A, Stanford, CA 94305

13 <sup>3</sup> DVPL Tech

14 <sup>4</sup> Hafen Consulting, LLC, West Richland WA, 99353

15 <sup>5</sup> Cytel Inc, 1050 Winter St Suite 2700 Waltham, MA 02451, USA

16 <sup>6</sup> Quantitative Sciences, Bill & Melinda Gates Foundation, 500 5th Ave N, Seattle, WA 98109

17 <sup>7</sup> Department of Nutrition, University of California, Davis, 3135 Meyer Hall, Davis, CA 95616-5270

18 <sup>8</sup> Center for Human Nutrition, Department of International Health, Johns Hopkins Bloomberg School of  
19 Public Health, Baltimore, MD 21205

20 <sup>9</sup> Francis I. Proctor Foundation, University of California, San Francisco, 490 Illinois St, San Francisco, CA  
21 94158

22 <sup>10</sup> Department of Ophthalmology, University of California, San Francisco, 490 Illinois St, San Francisco, CA  
23 94158  
24

25 \* Corresponding authors are Andrew Mertens ([amertens@berkeley.edu](mailto:amertens@berkeley.edu)) and Benjamin F. Arnold  
26 ([ben.arnold@ucsf.edu](mailto:ben.arnold@ucsf.edu)).

27 \*\*Members of the *ki* Child Growth Consortium

28 1. Souheila Abbeddou, Food Safety and Nutrition Unit, Department of Public Health and Primary  
29 Care, Ghent University, Belgium

30 2. Linda S. Adair, University of North Carolina at Chapel Hill

31 3. Tahmeed Ahmed, International Centre for Diarrhoeal Disease Research, Bangladesh

32 4. Asad Ali, Aga Khan University

33 5. Hasmat Ali, JiVita Project, Bangladesh, Johns Hopkins

34 6. Per Ashorn, Center for Child, Adolescent, and Maternal Health Research, Faculty of Medicine  
35 and Health Technology, Tampere University and Tampere University Hospital, Finland

36 7. Rajiv Bahl, World Health Organization

37 8. Mauricio L. Barreto, Center of Data and Knowledge Integration for Health, Fundação Oswaldo  
38 Cruz, Salvador, Brazil.

39 9. Elodie Becquey, International Food Policy Research Institute

40 10. France Bégin, UNICEF

41 11. Pascal Obong Bessong, HIV/AIDS & Global Health Research Programme, University of Venda

42 12. Maharaj Kishan Bhan, Indian Institute of Technology, New Delhi, India

43 13. Zulfiqar A. Bhutta, Institute for Global Health & Development & Center of Excellence in Women  
44 and Child Health, The Aga Khan University South-Central Asia, East Africa & United Kingdom

45 14. Nita Bhandari, Centre for Health Research and Development, Society for Applied Studies, New  
46 Delhi, India

47 15. Santosh K. Bhargava, Senior Consultant Pediatrics, Sunder Lal Jain Hospital, Ashok Vihar

- 48 16. Robert E. Black, Johns Hopkins University
- 49 17. Ladaporn Bodhidatta, Armed Forces Research Institute of Medical Sciences, Bangkok, Thailand
- 50 18. Delia Carba, USC Office of Population Studies Foundation, Inc., University of San Carlos, Cebu,
- 51 Philippines
- 52 19. William Checkley, Johns Hopkins University
- 53 20. Parul Christian, Bill and Melinda Gates Foundation, Johns Hopkins Bloomberg School of Public
- 54 Health
- 55 21. Jean E. Crabtree, Leeds Institute for Medical Research, St. James's University Hospital, University
- 56 of Leeds
- 57 22. Kathryn G. Dewey, Institute for Global Nutrition, Department of Nutrition, University of
- 58 California
- 59 23. Christopher P. Duggan, Center for Nutrition, Boston Children's Hospital
- 60 24. Caroline H.D. Fall, Emeritus Professor of International Paediatric Epidemiology, MRC Lifecourse
- 61 Epidemiology Centre, University of Southampton, UK
- 62 25. Abu Syed Golam Faruque, International Centre for Diarrhoeal Disease Research, Bangladesh
- 63 26. Wafaie W. Fawzi, Department of Global Health and Population, Harvard TH Chan School of
- 64 Public Health
- 65 27. José Quirino da Silva Filho, Federal University of Ceará
- 66 28. Robert H. Gilman, Johns Hopkins University Bloomberg School of Public Health
- 67 29. Richard L. Guerrant, University of Virginia, USA
- 68 30. Rashidul Haque, International Centre for Diarrhoeal Disease Research, Bangladesh
- 69 31. S. M. Tafsir Hasan, International Centre for Diarrhoeal Disease Research, Bangladesh
- 70 32. Sonja Y. Hess, Dept of Nutrition and Institute for Global Nutrition, University of California Davis
- 71 33. Eric R. Houpt, University of Virginia.edu
- 72 34. Jean H. Humphrey, Johns Hopkins Bloomberg School of Public Health
- 73 35. Najeeha Talat Iqbal, Department of Pediatrics and Child Health, Aga Khan University
- 74 36. Elizabeth Yakes Jimenez, Departments of Pediatrics and Internal Medicine, University of New
- 75 Mexico Health Sciences Center
- 76 37. Jacob John, Christian Medical College, Vellore, Tamil Nadu, India
- 77 38. Sushil Matthew John, Professor, Low Cost Effective Care Unit, Christian Medical College, Vellore
- 78 TN 632004 India
- 79 39. Gagandeep Kang, Translational Health Science and Technology Institute, Faridabad, Haryana,
- 80 India
- 81 40. Margaret Kosek, University of Virginia
- 82 41. Michael S. Kramer, McGill University and McGill University Health Centre
- 83 42. Alain Labrique, Center of Human Nutrition, Department of International Health, Johns
- 84 Hopkins Bloomberg School of Public Health
- 85 43. Nanette R. Lee, USC-Office of Population Studies Foundation Inc., University of San Carlos, Cebu,
- 86 Philippines
- 87 44. Aldo Ângelo Moreira Lima, Federal University of Ceará
- 88 45. Tjale Cloupas Mahopo, Department of Nutrition, School of Health Sciences, University of Venda
- 89 46. Kenneth Maleta, Department of Public Health, School of Public Health and Family Medicine,
- 90 College of Medicine
- 91 47. Dharma S. Manandhar, Mother and Infant Research Activities
- 92 48. Karim P. Manji, Department of Pediatrics and Child Health, Muhimbili University School of
- 93 Health and Allied Sciences, Dar es Salaam, Tanzania
- 94 49. Reynaldo Martorell, Rollins School of Public Health, Emory University

- 95 50. Sarmila Mazumder, Centre for Health Research and Development, Society for Applied Studies,  
96 New Delhi, India
- 97 51. Estomih Mduma, Haydom Lutheran Hospital, Haydom, Tanzania
- 98 52. Venkata Raghava Mohan, Professor, Community Medicine, Christian Medical College, Vellore TN  
99 632004 India
- 100 53. Sophie E. Moore, Department of Women and Children's Health, Kings College London, London,  
101 UK & MRC Unit The Gambia at London School of Hygiene and Tropical Medicine, The Gambia
- 102 54. Robert Ntozini, Zvitambo Institute for Maternal and Child Health Research
- 103 55. Mzwakhe Emanuel Nyathi, Department of Animal Sciences, School of Agriculture, University of  
104 Venda
- 105 56. Maribel Paredes Olortegui, AB PRISMA
- 106 57. Césaire T. Ouédraogo, Institute for Global Nutrition, Department of Nutrition, University of  
107 California, Davis, CA, USA
- 108 58. William A. Petri, University of Virginia
- 109 59. Prasanna Samuel Premkumar, Christian Medical College, Vellore, Tamil Nadu, India
- 110 60. Andrew M. Prentice, MRC Unit The Gambia at London School of Hygiene and Tropical Medicine,  
111 Banjul, The Gambia
- 112 61. Najeeb Rahman, Aga Khan University
- 113 62. Manuel Ramirez-Zea, INCAP Research Center for the Prevention of Chronic Diseases, Institute of  
114 Nutrition of Central America and Panama, Guatemala City, Guatemala
- 115 63. Harshpal Singh Sachdev, Senior Consultant Pediatrics and Clinical Epidemiology, Sitaram Bhartia  
116 Institute of Science and Research, B-16 Qutab Institutional Area, New Delhi, India
- 117 64. Kamran Sadiq, Aga Khan University
- 118 65. Rajiv Sarkar, Christian Medical College, Vellore, Tamil Nadu, India
- 119 66. Monira Sarmin, International Centre for Diarrhoeal Disease Research, Bangladesh
- 120 67. Naomi M. Saville, Institute for Global Health, University College London
- 121 68. Saijuddin Shaikh, JiViTA Project, Bangladesh, Johns Hopkins
- 122 69. Bhim P. Shrestha, Health Research and Development Forum, Kathmandu, Nepal
- 123 70. Sanjaya Kumar Shrestha, MD, Walter Reed/AFRIMS Research Unit, Kathmandu, Nepal Centre for  
124 International Health, University of Bergen
- 125 71. Alberto Melo Soares, Federal University of Ceará
- 126 72. Bakary Sonko, MRC Unit The Gambia at London School of Hygiene and Tropical Medicine, Banjul,  
127 The Gambia
- 128 73. Aryeh D. Stein, Hubert Department of Global Health, Rollins School of Public Health, Emory  
129 University
- 130 74. Erling Svensen, Haukeland University Hospital
- 131 75. Sana Syed, Department of Pediatrics, Division of Gastroenterology, Hepatology & Nutrition  
132 University of Virginia School of Medicine, and Aga Khan University
- 133 76. Fayaz Umrani, Aga Khan University
- 134 77. Honorine D. Ward, Tufts Medical Center, Tufts University School of Medicine
- 135 78. Keith P. West Jr., Center for Human Nutrition, Department of International Health, Johns  
136 Hopkins Bloomberg School of Public Health
- 137 79. Lee Shu Fune Wu, Center for Human Nutrition, Department of International Health, Johns  
138 Hopkins Bloomberg School of Public Health
- 139 80. Seungmi Yang, McGill University
- 140 81. Pablo Penataro Yori, University of Virginia

141  
142

143 Abstract limit ~200 words; current count 206

144 Main text limit 2000-3000 words; current count 3168

145

## 146 **Summary**

147 **Growth faltering (low length-for-age or weight-for-length) in the first 1000 days — from conception to**  
148 **two years of age — influences short and long-term health and survival. Interventions such as**  
149 **nutritional supplementation during pregnancy and the postnatal period could help prevent growth**  
150 **faltering, but programmatic action has been insufficient to eliminate the high burden of stunting and**  
151 **wasting in low- and middle-income countries. Future preventive efforts will benefit from**  
152 **understanding age-windows and population subgroups in which to focus. Here, we use a population**  
153 **intervention effects analysis of 33 longitudinal cohorts (83,671 children, 662,763 measurements) and**  
154 **30 separate exposures to show that improving maternal anthropometry and child condition at birth**  
155 **accounted for population increases in length-for-age Z of up to 0.40 and weight-for-length Z of up to**  
156 **0.15 by age 24 months. Boys had consistently higher risk of all forms of growth faltering than girls.**  
157 **Early post-natal growth faltering predisposed children to subsequent and persistent growth faltering.**  
158 **Children with multiple growth deficits had higher mortality rates from birth to two years than those**  
159 **without deficits (hazard ratios 1.9 to 8.7). The importance of prenatal causes, and severe**  
160 **consequences for children who experienced early growth faltering, support a focus on pre-conception**  
161 **and pregnancy as key opportunities for new preventive interventions.**

162

## 163 **Introduction**

164 Child growth faltering in the form of stunting, a marker of chronic malnutrition, and wasting, a  
165 marker of acute malnutrition, is common among young children in low-resource settings, and may  
166 contribute to child mortality and adult morbidity.<sup>1,2</sup> Worldwide, 22% of children under age 5 years are  
167 stunted and 7% are wasted, with most of the burden occurring in low- and middle-income countries  
168 (LMIC).<sup>3</sup> Current estimates attribute >250,000 deaths annually to stunting and >1 million deaths  
169 annually to wasting.<sup>2</sup> Stunted or wasted children also experience worse cognitive development<sup>4-6</sup> and  
170 adult economic outcomes.<sup>7</sup>

171 Despite widespread recognition of the importance of growth faltering to global public health,  
172 preventive interventions in LMICs have had limited success.<sup>8</sup> A range of nutritional interventions  
173 targeting various life stages of the fetal and childhood periods, including nutrition education, food and  
174 micronutrient supplementation during pregnancy, promotion of exclusive breastfeeding for 6 months  
175 and continued breastfeeding for 2 years, and food and micronutrient supplementation during  
176 complementary feeding, have all had a beneficial effect on child growth.<sup>9-11</sup> However, postnatal  
177 breastfeeding interventions and nutritional interventions delivered to children who have begun  
178 complementary feeding have only had small effects on population-level stunting and wasting burdens,  
179 and implementation remains a substantial challenge.<sup>9,12,13</sup> Additionally, water, sanitation, and hygiene  
180 (WASH) interventions, which aim to reduce childhood infections that may heighten the risk of wasting  
181 and stunting, have had no effect on child growth in several recent large randomized control trials.<sup>14-16</sup>

182 Modest effects of interventions to prevent stunting and wasting may reflect an incomplete  
183 understanding of the optimal way and time to intervene.<sup>17</sup> This knowledge gap has spurred renewed  
184 interest in recent decades to combine rich data sources with advances in statistical methodology<sup>18</sup> to  
185 more deeply understand the key causes of growth faltering.<sup>19</sup> Understanding the relationship between  
186 the causes and timing of growth faltering is also crucial because children who falter early could be at  
187 higher risk for more severe growth faltering later. In companion articles, we report that the highest rates  
188 of incident stunting and wasting occur by age 3 months.<sup>20,21</sup>

189

## 190 **Pooled longitudinal analyses**

191 Here, we report a pooled analysis of 33 longitudinal cohorts in 15 low- and middle-income countries  
192 in South Asia, Sub-Saharan Africa, Latin America, and Eastern Europe, with data collection initiated  
193 between 1987 and 2014. Our objective was to estimate relationships between child, parental, and  
194 household characteristics and measures of child anthropometry, including length-for-age Z-scores (LAZ),  
195 weight-for-length Z-scores (WLZ), weight-for-age Z-scores (WAZ), stunting, wasting, underweight, and  
196 length and weight velocities from birth to age 24 months. Details on the estimation of growth faltering  
197 outcomes are included in companion articles.<sup>20,21</sup> We also estimated associations between early growth  
198 faltering and more severe growth faltering or mortality by age 24 months.

199 Cohorts were assembled as part of the Bill & Melinda Gates Foundation's Knowledge Integration (*ki*)  
200 initiative, which included studies of growth and development in the first 1000 days, beginning at  
201 conception.<sup>22</sup> We selected longitudinal cohorts from the database that met five inclusion criteria: 1)  
202 conducted in low- or middle-income countries; 2) enrolled children between birth and age 24 months  
203 and measured their length and weight repeatedly over time; 3) did not restrict enrollment to acutely ill  
204 children; 4) enrolled children with a median year of birth after 1990; and 5) collected anthropometric  
205 status measurements at least every 3 months (Extended Data Fig 1). Inclusion criteria ensured we could  
206 rigorously evaluate the timing and onset of growth faltering among children who were broadly  
207 representative of populations in low- and middle-income countries. Thirty-three cohorts from 15  
208 countries met inclusion criteria, and 83,671 children and 592,030 total measurements were included in  
209 this analysis (Fig 1). Child mortality was rare and not reported in many of the *ki* datasets, so we relaxed  
210 inclusion criteria for studies used in the mortality analysis to include studies that measured children at  
211 least twice a year. Four additional cohorts met this inclusion criterion, and 14,317 children and 70,733  
212 additional measurements were included in mortality analyses (97,988 total children, 662,763 total  
213 observations, Extended Data Table 1). Cohorts were distributed throughout South Asia, Africa, and Latin  
214 America, with a single European cohort from Belarus.

215

## 216 **Population intervention effects on growth faltering**

217 In a series of analyses, we estimated population intervention effects, the estimated change in  
218 population mean Z-score if all individuals in the population had their exposure shifted from observed  
219 levels to the lowest-risk reference level.<sup>23</sup> The PIE is a policy-relevant parameter; it estimates the  
220 improvement in outcome that could be achievable through intervention for modifiable exposures, as it  
221 is a function of the degree of difference between the unexposed and the exposed in a children's



222 anthropometry Z-scores, as well as the observed distribution of exposure in the population. We selected  
223 exposures that were measured in multiple cohorts, could be harmonized across cohorts for pooled  
224 analyses, and had been identified as important predictors of stunting or wasting in prior literature (Fig 1,  
225 Extended Data Table 2). Exposure measurement varied by cohort, but all estimates were adjusted for all  
226 other measured exposures that we assumed were not on the causal pathway between the exposure of  
227 interest and the outcome. For example, the association between maternal height and stunting was not  
228 adjusted for child birth weight, because low maternal height could increase stunting risk through lower  
229 child birth weight.<sup>24</sup> Parameters were estimated using targeted maximum likelihood estimation, a  
230 doubly-robust, semiparametric method that allows for valid inference while adjusting for potential  
231 confounders using ensemble machine learning (details in Methods).<sup>18,25</sup> We estimated cohort-specific  
232 parameters, adjusting for measured covariates within each cohort, and then pooled estimates across  
233 cohorts using random effects models (Extended data Fig 1).<sup>26</sup> We chose as the reference exposure for  
234 PIEs the level of lowest risk across cohorts. We also estimated the effects of optimal dynamic  
235 interventions, where each child's individual low-risk level of exposure was estimated from potential  
236 confounders (details in Methods). Timing of exposures varied, from parental and household  
237 characteristics present before birth, to fetal or at-birth exposures, and postnatal exposures. We  
238 estimated associations with growth faltering that occurred after exposure measurements to ensure  
239 time-ordering of exposures and outcomes.

240 Population level improvements in maternal height and birth size would be expected to improve  
241 child LAZ and WLZ at age 24 months substantially, owing to both the high prevalence of suboptimal  
242 anthropometry in the populations and their strong association with attained growth at 24 months (Fig 2,  
243 Fig 3). Beyond anthropometry, key predictors of higher Z-scores included markers of better household  
244 socioeconomic status (e.g., number of rooms in the home, parental education, clean cooking fuel use,  
245 household wealth index). The pooled, cross-validated  $R^2$  for models that included the top 10  
246 determinants for each Z-score, plus child sex, was 0.25 for LAZ (N= 20 cohorts, 25,647 children) and 0.07  
247 for WLZ (N=18 cohorts, 17,853 children). The population level impact of season on WLZ was large, with  
248 higher WLZ in drier periods (Fig 3), consistent with seasonal differences shown in a companion article.<sup>21</sup>  
249 Exclusive or predominant breastfeeding before 6 months of age was associated with higher WLZ but not  
250 LAZ at 6 months of age and was not a major predictor of Z-scores at 24 months (Extended Data Figs  
251 2,3,4).<sup>27</sup> Girls had consistently better LAZ and WLZ than boys, potentially from sex-specific differences in  
252 immunology, nutritional demands, care practices, and intrauterine growth.<sup>28</sup>

253 The findings underscore the importance of prenatal exposures for child growth outcomes, and  
254 at the population-level growth faltering may be difficult to shift without broad improvements in  
255 standard of living.<sup>7,29</sup> Maternal anthropometric status can influence child Z-scores by affecting fetal  
256 growth and birth size.<sup>30,31</sup> Maternal height and BMI could directly affect postnatal growth through  
257 breastmilk quality, or could reflect family poverty, genetics, undernutrition, or food insecurity, or family  
258 lifestyle and diet.<sup>32,33</sup> In a secondary analysis, we estimated the associations between parental  
259 anthropometry and child Z-scores controlling for birth characteristics, and found the associations were  
260 only partially mediated by birth size, order, hospital delivery, and gestational age at birth, with adjusted  
261 Z-score differences attenuated by a median of 30% (Extended data Fig 5).

262 The strongest predictors of stunting and wasting estimated through population attributable

263 fractions closely matched those identified for child LAZ and WLZ at 24 months (Extended Data Figs 6, 7),  
264 suggesting that information embedded in continuous and binary measures of child growth provide  
265 similar inference with respect to identifying public-health relevant causes. Potential improvements  
266 through population interventions were relatively modest. For example, if all children were born to  
267 higher BMI mothers ( $\geq 20$ ) compared to the observed distribution of maternal BMI, one of the largest  
268 predictors of wasting, we estimate it would reduce the incidence of wasting by age 24 months by 8.2%  
269 (95% CI: 4.4, 12.0; Extended Data Fig 7). Patterns in associations across growth outcomes were broadly  
270 consistent, except for preterm birth, which had a stronger association with stunting outcomes than  
271 wasting outcomes, and rainy season, which was strongly associated with wasting but not stunting  
272 (Extended Data Fig 2). Direction of associations did not vary across regions, but magnitude did, notably  
273 male sex was less strongly associated with low LAZ in South Asia (Extended Data Figs 8,9).

274

### 275 **Age-varying effects on growth faltering**

276 We estimated trajectories of mean LAZ and WLZ stratified by maternal height and BMI. We  
277 found that maternal height strongly influenced at-birth LAZ, but that LAZ progressed along similar  
278 trajectories through age 24 months regardless of maternal height (Fig 4a), with similar though slightly  
279 less pronounced differences when stratified by maternal BMI (Fig 4b). By contrast, children born to taller  
280 mothers had similar WLZ at birth and WLZ trajectories until age 3-4 months, when they diverged  
281 substantially (Fig 4a); WLZ trajectory differences were even more pronounced when stratified by  
282 maternal BMI (Fig 4b). The findings illustrate how maternal status strongly influences where child  
283 growth trajectories start, but that growth trajectories evolve in parallel, seeming to respond similarly to  
284 postnatal insults independent of their starting point.

285 We hypothesized that causes of growth faltering could differ by age of growth faltering onset —  
286 for example, we expected children born preterm would have higher risk of incident growth faltering  
287 immediately after birth, while food insecurity might increase risk at older ages, after weaning. For  
288 exposures studied in the population intervention effect analyses, we conducted analyses stratified by  
289 age of onset and in many cases found age-varying effects (Fig 4c). For example, most measures of  
290 socioeconomic status were associated with incident wasting or stunting only after age 6 months, and  
291 higher birth order lowered growth faltering risk under age 6 months, but increased risk thereafter. First  
292 born babies are born thin and show rapid postnatal catch up in WLZ (Extended data Fig 10). This is likely  
293 because first-born babies suffer uterine constraint caused by a less developed uterine-placental-vascular  
294 supply<sup>34,35</sup> resulting in birth weights being lower by 100-200g in most cohorts studied; weight is  
295 generally more compromised than height.<sup>36</sup> The switch from a constrained uterine-placental nutrient  
296 supply line to oral nutrition permits post-natal catch up. Stronger relationships between key socio-  
297 demographic characteristics and wasting and stunting as children age likely reflects the accumulation of  
298 insults that result from household conditions, particularly as complementary feeding is initiated, and  
299 children begin exploring their environment and potentially face higher levels of food insecurity  
300 especially in homes with multiple children.<sup>37</sup> When viewed across multiple definitions of growth  
301 faltering, most exposures had stronger associations with severe stunting, severe wasting, or persistent  
302 wasting ( $> 50\%$  of measurements  $< -2$  WLZ), rarer but more serious outcomes, than with incidence of  
303 any wasting or stunting (Fig 4d). Additionally, the characteristics strongly associated with lower wasting

304 recovery by 90 days (birth size, small maternal stature, lower maternal education, later birth order, and  
305 male sex) increased risk of wasting prevalence and cumulative incidence (Extended data Fig 2).

306

### 307 **Consequences of early growth faltering**

308 We documented high incidence rates of wasting and stunting from birth to age 6 months in  
309 companion papers.<sup>20,21</sup> Based on previous studies, we hypothesized that early wasting could contribute  
310 to subsequent linear growth restriction, and early growth faltering could be consequential for persistent  
311 growth faltering and mortality during the first 24 months of life.<sup>38-40</sup> Among cohorts with monthly  
312 measurements, we examined age-stratified linear growth velocity by quartiles of WLZ at previous ages.  
313 We found a consistent exposure-response relationship between higher mean WLZ and faster linear  
314 growth velocity in the following 3 months (Fig 5a). Persistent wasting from birth to 6 months (defined as  
315 >50% of measurements wasted) was the wasting exposure most strongly associated with incident  
316 stunting at older ages (Fig 5b).

317 We next examined the relationship between measures of growth faltering in the first 6 months  
318 and serious growth-related outcomes: persistent wasting from 6-24 months and concurrent wasting and  
319 stunting at 18 months of age, both of which put children at high risk of mortality.<sup>1,38</sup> Concurrent wasting  
320 and stunting was measured at 18 months because stunting prevalence peaked at 18 months and the  
321 largest number of children were measured at 18 months across cohorts.<sup>20</sup> All measures of early growth  
322 faltering were significantly associated with later, more serious growth faltering, with measures of  
323 ponderal growth faltering amongst the strongest predictors (Fig 5c).

324 Finally, we estimated hazard ratios (HR) of all-cause mortality by 2 years of age associated with  
325 measures of growth faltering within eight cohorts that reported ages of death, which included 1,689  
326 child deaths by age 24 months (2.4% of children in the eight cohorts). Included cohorts were highly  
327 monitored, and mortality rates were lower than in the general population in most cohorts (Extended  
328 Data Table 3). Additionally, data included only deaths that occurred after anthropometry  
329 measurements, so many neonatal deaths may have been excluded, and without data on cause-specific  
330 mortality, some deaths may have occurred from causes unrelated to growth faltering. Despite these  
331 caveats, growth faltering increased the hazard of death before 24 months for all measures except  
332 stunting alone, with strongest associations observed for severe wasting, stunting, and underweight  
333 (HR=8.7, 95% CI: 4.7 to 16.4) and severe underweight alone (HR=4.2, 95% CI: 2.0 to 8.6) (Fig 5d).

334

### 335 **Discussion**

336 This synthesis of LMIC cohorts during the first 1000 days of life has provided new insights into the  
337 principal causes and near-term consequences of growth faltering. Our use of a novel, semi-parametric  
338 method to adjust for potential confounding provided a harmonized approach to estimate population  
339 intervention effects that spanned child-, parent-, and household-level exposures with unprecedented  
340 breadth (30 exposures) and scale (662,763 anthropometric measurements from 33 cohorts). Our focus  
341 on effects of shifting population-level exposures on continuous measures of growth faltering reflect a  
342 growing appreciation that growth faltering is a continuous process.<sup>41</sup> Our results show children in LMICs  
343 stand to benefit from interventions to support optimal growth in the first 1000 days. Combining



344 information from high-resolution, longitudinal cohorts enabled us to study critically important outcomes  
345 not possible in smaller studies or in cross-sectional data, such as persistent wasting and mortality, as  
346 well as examine risk-factors by age.

347 Maternal, prenatal, and at-birth characteristics were the strongest predictors of growth faltering  
348 across regions in LMICs. Our results underscore prenatal exposures as key determinants of child growth  
349 faltering.<sup>42</sup> Limited impact of exclusive or predominant breastfeeding through 6 months (+0.01 LAZ)  
350 aligns with a meta-analysis of breastfeeding promotion,<sup>27</sup> but our finding of limited impact of reducing  
351 diarrhea through 24 months (+0.05 LAZ) contrasts with some observational studies.<sup>43,44</sup> Many predictors,  
352 like child sex, birth order, or season, are not modifiable but could guide interventions that mitigate their  
353 effects, such as seasonally targeted supplementation or enhanced monitoring among boys. Strong  
354 associations between maternal anthropometry and early growth faltering highlight the role of  
355 intergenerational transfer of growth deficits between mothers and their children.<sup>32</sup> Shifting several key  
356 population exposures (maternal height or BMI, education, birth length) to their observed low-risk level  
357 would improve LAZ by up to 0.40 z and WLZ by up to 0.15 z in target populations and could be expected  
358 to prevent 8% to 32% of incident stunting and wasting (Figs 2,3 Extended Data Figs 6,7). Maternal  
359 anthropometric status strongly influenced birth size, but the parallel drop in postnatal Z-scores among  
360 children born to different maternal phenotypes was much larger than differences at birth, indicating  
361 that growth trajectories were not fully “programmed” at birth (Fig 4a-b). This accords with the transition  
362 from a placental to oral nutrient supply at birth.

363 The analyses have caveats. Population intervention effects were based on exposure distributions in  
364 the 33 cohorts, which were not necessarily representative of the general population in each setting. Use  
365 of external exposure distributions from population-based surveys would be difficult because many key  
366 exposures we considered, such as at-birth characteristics or longitudinal diarrhea prevalence, are not  
367 measured in such surveys. In some cases, detailed exposure measurements like longitudinal  
368 breastfeeding or diarrhea history were coarsened to simpler measures to harmonize definitions across  
369 cohorts, potentially attenuating their association with growth faltering. Other key exposures such as  
370 dietary diversity, nutrient consumption, micronutrient status, maternal and child morbidity indicators,  
371 pathogen-specific infections, and sub-clinical inflammation and intestinal dysfunction were measured in  
372 only a few cohorts, so were not included.<sup>45,46</sup> The absence of these exposures in the analysis, some of  
373 which have been found to be important within individual contributed cohorts,<sup>46,47</sup> means that our  
374 results emphasize exposures that were more commonly collected, but likely exclude some additional  
375 causes of growth faltering. A final caveat is that we studied consequences through age 24 months — the  
376 primary age range of contributed *ki* cohort studies — and thus have not considered effects on longer-  
377 term outcomes. Several studies have suggested that puberty could be another potential window for  
378 intervention to enhance catch-up growth.<sup>48</sup> Improving girls’ stature at any point through puberty could  
379 help blunt the intergenerational transfer of growth faltering by improving maternal height,<sup>49</sup> which in  
380 turn could improve outcomes among their children (Figs 2, 3, 4a, 4b).

381 Countries that have reduced stunting most have undergone improvements in maternal education,  
382 nutrition, reductions in number of pregnancies, and maternal and newborn health care,<sup>50</sup> reinforcing the  
383 importance of interventions during the window from conception to one year, when fetal and infant  
384 growth velocity is high and energy expenditure for growth and development is about 50% above adult

385 values (adjusted for fat-free mass).<sup>51</sup> A stronger focus on prenatal interventions should not distract from  
386 renewed efforts for postnatal prevention. The observed pre- and postnatal growth faltering we  
387 observed reinforce the need for sustained support of mothers and children throughout the first 1000  
388 days. Efficacy trials that delivered prenatal nutrition supplements to pregnant mothers,<sup>52–54</sup> therapeutics  
389 to reduce infection and inflammation for pregnant mothers,<sup>55–59</sup> and nutritional supplements to children  
390 6–24 months<sup>11,60</sup> have reduced child growth faltering but have fallen short of completely preventing it.  
391 Our results suggest that the next generation of preventive interventions should focus on the early  
392 period of a child’s first 1000 days — from preconception through the first months of life — because  
393 maternal status and at-birth characteristics are key determinants of growth faltering through 24  
394 months. Halting the cycle of growth faltering early should reduce the risk of its severe consequences,  
395 including mortality, during this formative window of child development. Long-term investments and  
396 patience may be required, as it will take decades to eliminate the intergenerational factors limiting  
397 mothers’ size.

398

## 399 **References**

- 400 1. McDonald, C. M. *et al.* The effect of multiple anthropometric deficits on child mortality: meta-analysis  
401 of individual data in 10 prospective studies from developing countries. *Am. J. Clin. Nutr.* **97**, 896–901  
402 (2013).
- 403 2. Forouzanfar, M. H. *et al.* Global, regional, and national comparative risk assessment of 79  
404 behavioural, environmental and occupational, and metabolic risks or clusters of risks, 1990–2015: a  
405 systematic analysis for the Global Burden of Disease Study 2015. *The Lancet* **388**, 1659–1724  
406 (2016).
- 407 3. WHO | Joint child malnutrition estimates - Levels and trends (2019 edition). *WHO*  
408 <http://www.who.int/nutgrowthdb/estimates2018/en/>.
- 409 4. Sudfeld, C. R. *et al.* Malnutrition and Its Determinants Are Associated with Suboptimal Cognitive,  
410 Communication, and Motor Development in Tanzanian Children. *J. Nutr.* **145**, 2705–2714 (2015).
- 411 5. Black, R. E. *et al.* Maternal and child undernutrition and overweight in low-income and middle-income  
412 countries. *Lancet* **382**, 427–451 (2013).
- 413 6. Grantham-McGregor, S. *et al.* Developmental potential in the first 5 years for children in developing  
414 countries. *The Lancet* **369**, 60–70 (2007).
- 415 7. McGovern, M. E., Krishna, A., Aguayo, V. M. & Subramanian, S. V. A review of the evidence linking  
416 child stunting to economic outcomes. *Int. J. Epidemiol.* **46**, 1171–1191 (2017).
- 417 8. Bhutta, Z. A. *et al.* What works? Interventions for maternal and child undernutrition and survival.  
418 *Lancet* **371**, 417–440 (2008).
- 419 9. Panjwani, A. & Heidkamp, R. Complementary Feeding Interventions Have a Small but Significant  
420 Impact on Linear and Ponderal Growth of Children in Low- and Middle-Income Countries: A  
421 Systematic Review and Meta-Analysis. *J. Nutr.* **147**, 2169S–2178S (2017).
- 422 10. Bhutta, Z. A. *et al.* Evidence-based interventions for improvement of maternal and child nutrition:  
423 what can be done and at what cost? *The Lancet* **382**, 452–477 (2013).
- 424 11. Dewey, K. G. *et al.* Preventive small-quantity lipid-based nutrient supplements reduce severe wasting  
425 and severe stunting among young children: an individual participant data meta-analysis of  
426 randomized controlled trials. *Am. J. Clin. Nutr.* nqac232 (2022) doi:10.1093/ajcn/nqac232.
- 427 12. Dewey, K. G. *et al.* Characteristics that modify the effect of small-quantity lipid-based nutrient  
428 supplementation on child growth: an individual participant data meta-analysis of randomized  
429 controlled trials. *medRxiv* 2021.02.05.21251105 (2021) doi:10.1101/2021.02.05.21251105.
- 430 13. Stewart, C. P., Iannotti, L., Dewey, K. G., Michaelsen, K. F. & Onyango, A. W. Contextualising  
431 complementary feeding in a broader framework for stunting prevention. *Matern. Child. Nutr.* **9**, 27–45

- 432 (2013).
- 433 14. Null, C. *et al.* Effects of water quality, sanitation, handwashing, and nutritional interventions on  
434 diarrhoea and child growth in rural Kenya: a cluster-randomised controlled trial. *Lancet Glob. Health*  
435 **6**, e316–e329 (2018).
- 436 15. Luby, S. P. *et al.* Effects of water quality, sanitation, handwashing, and nutritional interventions on  
437 diarrhoea and child growth in rural Bangladesh: a cluster randomised controlled trial. *Lancet Glob.*  
438 *Health* **6**, e302–e315 (2018).
- 439 16. Humphrey, J. H. *et al.* Independent and combined effects of improved water, sanitation, and hygiene,  
440 and improved complementary feeding, on child stunting and anaemia in rural Zimbabwe: a cluster-  
441 randomised trial. *Lancet Glob. Health* **7**, e132–e147 (2019).
- 442 17. Young, H. & Marshak, A. A discussion paper on the scope of the problem, its drivers, and strategies  
443 for moving forward for policy, practice, and research. 55.
- 444 18. Coyle, J. *et al.* (submitted). Targeting Learning: Robust Statistics for Reproducible Research. (2020).
- 445 19. Keats, E. C. *et al.* Effective interventions to address maternal and child malnutrition: an update of the  
446 evidence. *Lancet Child Adolesc. Health* **5**, 367–384 (2021).
- 447 20. Benjamin-Chung, J. *et al.* (submitted). Early childhood linear growth faltering in low-and middle-  
448 income countries. (2020).
- 449 21. Mertens, A. *et al.* (submitted). Child wasting and concurrent stunting in low- and middle-income  
450 countries. (2020).
- 451 22. Peppard, T. *et al.* (submitted). Combined longitudinal growth cohorts from infants born in South Asia,  
452 Sub-Saharan Africa and Latin America. (2020).
- 453 23. Westreich, D. From Patients to Policy: Population Intervention Effects in Epidemiology. *Epidemiol.*  
454 *Camb. Mass* **28**, 525–528 (2017).
- 455 24. Black RE *et al.* Maternal and child undernutrition and overweight in low-income and middle-income  
456 countries. *Lancet* **382**, 427–451 (2013).
- 457 25. Gruber, S. & Laan, M. van der. Targeted Maximum Likelihood Estimation: A Gentle Introduction. *UC*  
458 *Berkeley Div. Biostat. Work. Pap. Ser.* (2009).
- 459 26. Raudenbush, S. W. Analyzing Effect Sizes: Random-Effects Models. in *The Handbook of Research*  
460 *Synthesis and Meta-Analysis* 295–315 (Russell Sage Foundation, 2009).
- 461 27. Giugliani, E. R. J., Horta, B. L., Mola, C. L. de, Lisboa, B. O. & Victora, C. G. Effect of breastfeeding  
462 promotion interventions on child growth: a systematic review and meta-analysis. *Acta Paediatr.* **104**,  
463 20–29 (2015).
- 464 28. Thurstans, S. *et al.* Understanding Sex Differences in Childhood Undernutrition: A Narrative Review.  
465 *Nutrients* **14**, 948 (2022).
- 466 29. Haddad, L., Alderman, H., Appleton, S., Song, L. & Yohannes, Y. Reducing Child Malnutrition: How  
467 Far Does Income Growth Take Us? *World Bank Econ. Rev.* **17**, 107–131 (2003).
- 468 30. Young, M. F. *et al.* Role of maternal preconception nutrition on offspring growth and risk of stunting  
469 across the first 1000 days in Vietnam: A prospective cohort study. *PloS One* **13**, e0203201 (2018).
- 470 31. Addo, O. Y. *et al.* Maternal Height and Child Growth Patterns. *J. Pediatr.* **163**, 549-554.e1 (2013).
- 471 32. Martorell, R. & Zongrone, A. Intergenerational Influences on Child Growth and Undernutrition.  
472 *Paediatr. Perinat. Epidemiol.* **26**, 302–314 (2012).
- 473 33. Bzikowska-Jura, A. *et al.* Maternal Nutrition and Body Composition During Breastfeeding: Association  
474 with Human Milk Composition. *Nutrients* **10**, (2018).
- 475 34. Gluckman, P. D. & Hanson, M. A. Maternal constraint of fetal growth and its consequences. *Semin.*  
476 *Fetal. Neonatal Med.* **9**, 419–425 (2004).
- 477 35. Hafner, E., Schuchter, K., Metzenbauer, M. & Philipp, K. Uterine artery Doppler perfusion in the first  
478 and second pregnancies. *Ultrasound Obstet. Gynecol. Off. J. Int. Soc. Ultrasound Obstet. Gynecol.*  
479 **16**, 625–629 (2000).
- 480 36. Ong, K. K. L. *et al.* Size at birth and early childhood growth in relation to maternal smoking, parity and  
481 infant breast-feeding: longitudinal birth cohort study and analysis. *Pediatr. Res.* **52**, 863–867 (2002).

- 482 37. Garg, A. & Morduch, J. Sibling rivalry and the gender gap: Evidence from child health outcomes in  
483 Ghana. *J. Popul. Econ.* **11**, 471–493 (1998).
- 484 38. Myatt, M. *et al.* Children who are both wasted and stunted are also underweight and have a high risk  
485 of death: a descriptive epidemiology of multiple anthropometric deficits using data from 51 countries.  
486 *Arch. Public Health* **76**, (2018).
- 487 39. Richard, S. A. *et al.* Wasting Is Associated with Stunting in Early Childhood<sup>123</sup>. *J. Nutr.* **142**, 1291–  
488 1296 (2012).
- 489 40. Stobaugh, H. C. *et al.* Children with Poor Linear Growth Are at Risk for Repeated Relapse to Wasting  
490 after Recovery from Moderate Acute Malnutrition. *J. Nutr.* **148**, 974–979 (2018).
- 491 41. Perumal, N., Bassani, D. G. & Roth, D. E. Use and Misuse of Stunting as a Measure of Child Health.  
492 *J. Nutr.* **148**, 311–315 (2018).
- 493 42. Christian, P. *et al.* Risk of childhood undernutrition related to small-for-gestational age and preterm  
494 birth in low- and middle-income countries. *Int J Epidemiol* **42**, 1340–1355 (2013).
- 495 43. Schlaudecker, E. P., Steinhoff, M. C. & Moore, S. R. Interactions of diarrhea, pneumonia, and  
496 malnutrition in childhood: recent evidence from developing countries. *Curr. Opin. Infect. Dis.* **24**, 496–  
497 502 (2011).
- 498 44. Checkley, W. *et al.* Multi-country analysis of the effects of diarrhoea on childhood stunting. *Int. J.*  
499 *Epidemiol.* **37**, 816–830 (2008).
- 500 45. Black, R. E. *et al.* Maternal and child undernutrition: global and regional exposures and health  
501 consequences. *Lancet* **371**, 243–260 (2008).
- 502 46. Kosek, M. *et al.* Fecal markers of intestinal inflammation and permeability associated with the  
503 subsequent acquisition of linear growth deficits in infants. *Am. J. Trop. Med. Hyg.* **88**, 390–396  
504 (2013).
- 505 47. Investigators, M.-E. N. Relationship between growth and illness, enteropathogens and dietary intakes  
506 in the first 2 years of life: findings from the MAL-ED birth cohort study. *BMJ Glob. Health* **2**, (2017).
- 507 48. Prentice, A. M. *et al.* Critical windows for nutritional interventions against stunting<sup>123</sup>. *Am. J. Clin.*  
508 *Nutr.* **97**, 911–918 (2013).
- 509 49. Georgiadis, A. *et al.* Growth recovery and faltering through early adolescence in low- and middle-  
510 income countries: Determinants and implications for cognitive development. *Soc. Sci. Med.* **179**, 81–  
511 90 (2017).
- 512 50. Bhutta, Z. A. *et al.* How countries can reduce child stunting at scale: lessons from exemplar  
513 countries. *Am. J. Clin. Nutr.* **112**, 894S-904S (2020).
- 514 51. Pontzer, H. *et al.* Daily energy expenditure through the human life course. *Science* **373**, 808–812  
515 (2021).
- 516 52. Lassi, Z. S. *et al.* Effects of nutritional interventions during pregnancy on birth, child health and  
517 development outcomes: A systematic review of evidence from low- and middle-income countries.  
518 *Campbell Syst. Rev.* **17**, e1150 (2021).
- 519 53. Hambidge, K. M. *et al.* A multicountry randomized controlled trial of comprehensive maternal nutrition  
520 supplementation initiated before conception: the Women First trial. *Am. J. Clin. Nutr.* **109**, 457–469  
521 (2019).
- 522 54. Callaghan-Gillespie, M. *et al.* Trial of ready-to-use supplemental food and corn-soy blend in pregnant  
523 Malawian women with moderate malnutrition: a randomized controlled clinical trial. *Am. J. Clin. Nutr.*  
524 **106**, 1062–1069 (2017).
- 525 55. *WHO Recommendations on Antenatal Care for a Positive Pregnancy Experience.* (World Health  
526 Organization, 2016).
- 527 56. ter Kuile, F. O., van Eijk, A. M. & Filler, S. J. Effect of sulfadoxine-pyrimethamine resistance on the  
528 efficacy of intermittent preventive therapy for malaria control during pregnancy: a systematic review.  
529 *JAMA* **297**, 2603–2616 (2007).
- 530 57. Kayentao, K. *et al.* Intermittent preventive therapy for malaria during pregnancy using 2 vs 3 or more  
531 doses of sulfadoxine-pyrimethamine and risk of low birth weight in Africa: systematic review and  
532 meta-analysis. *JAMA* **309**, 594–604 (2013).

- 533 58. Hendrixson, D. T. *et al.* A novel intervention combining supplementary food and infection control  
534 measures to improve birth outcomes in undernourished pregnant women in Sierra Leone: A  
535 randomized, controlled clinical effectiveness trial. *PLOS Med.* **18**, e1003618 (2021).
- 536 59. Hallamaa, L. *et al.* Child Health Outcomes After Presumptive Infection Treatment in Pregnant  
537 Women: A Randomized Trial. *Pediatrics* **141**, (2018).
- 538 60. Dewey, K. G. *et al.* Characteristics that modify the effect of small-quantity lipid-based nutrient  
539 supplementation on child growth: an individual participant data meta-analysis of randomized  
540 controlled trials. *Am. J. Clin. Nutr.* **114**, 15S-42S (2021).
- 541
- 542
- 543
- 544
- 545



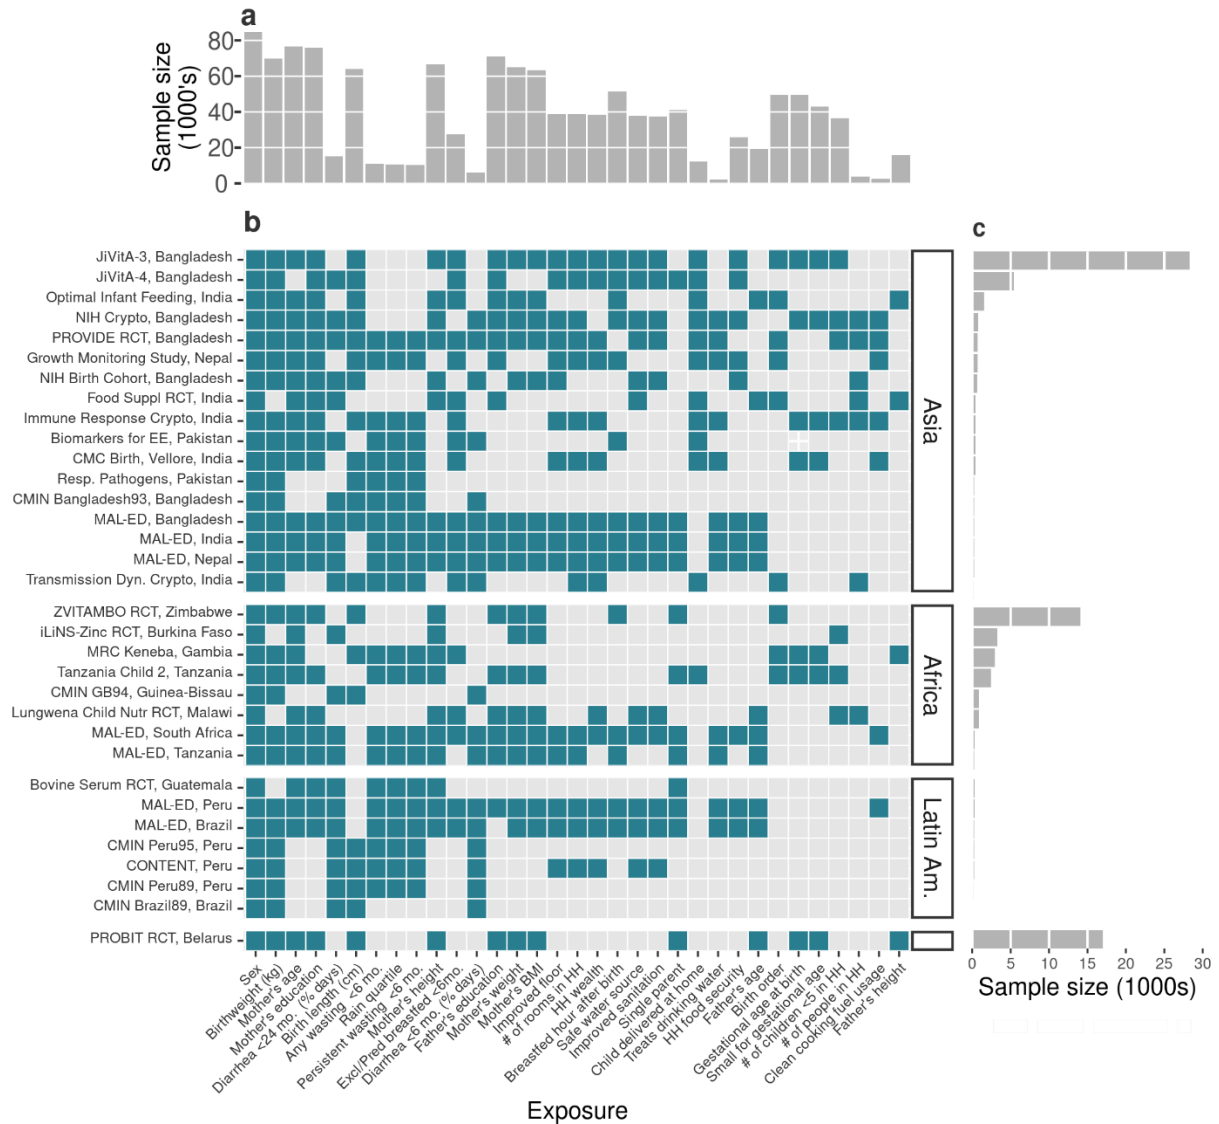

546  
 547 **Figure 1. Cohort sample sizes and exposures measured.** (a) Total number of  
 548 children with each measured exposure, sorted from left to right by number of cohorts  
 549 measuring the exposure. (b) Presence of 30 exposure variables in the *ki* data by within  
 550 each included cohort. Cohorts are sorted by geographic region and sample size. (c)  
 551 Number child anthropometry observations contributed by each cohort.

### At-birth child characteristics

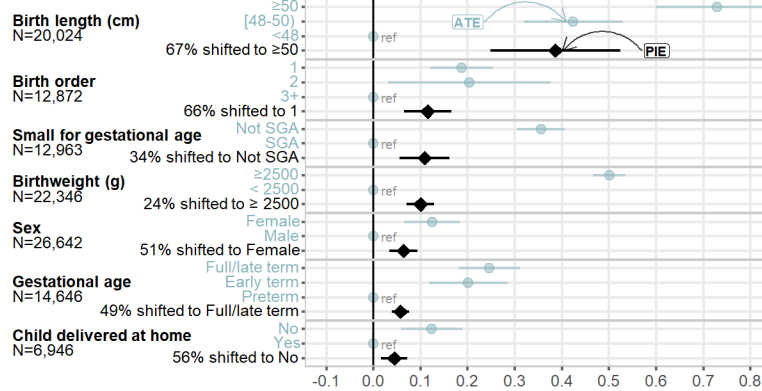

### Postnatal child characteristics

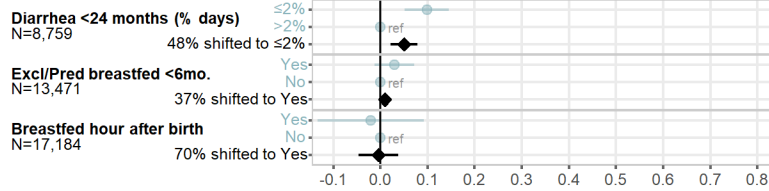

### Parental Characteristics

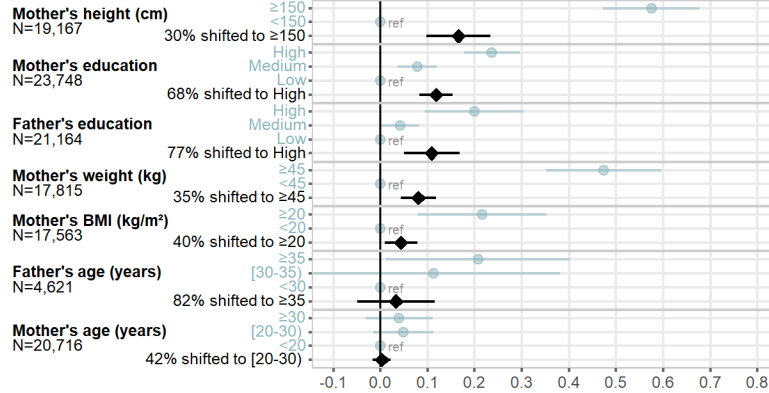

### Household & Environmental Characteristics

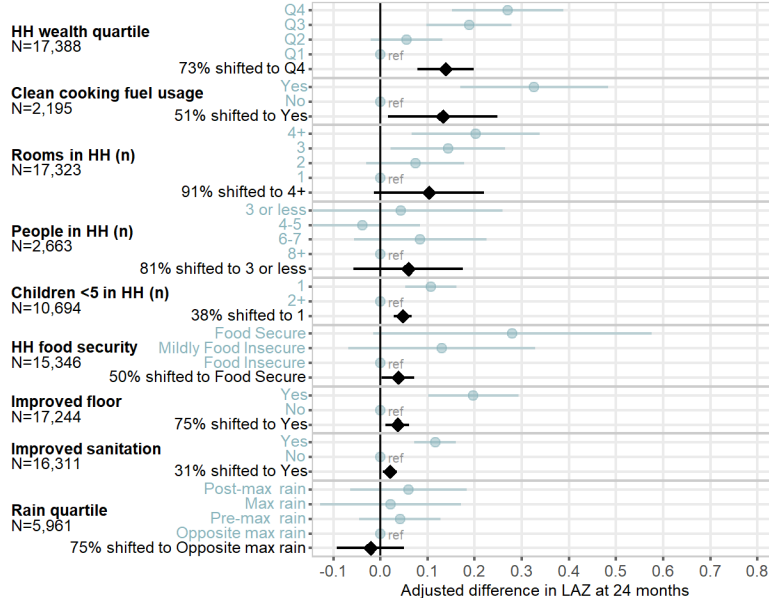

553 **Figure 2. Population intervention effects and mean differences of child, parental,**  
554 **and household exposures on length-for-age z-scores at age 24 months.**

555 Lighter points show adjusted mean differences (average treatment effects, ATEs) between the labeled  
556 higher-risk levels of exposures and reference levels, and black points show population intervention effects  
557 (PIEs), the estimated difference in length-for-age z-scores (LAZ) after shifting exposure levels for all  
558 children to the reference level. The number of children that contributed to each analysis is listed by  
559 exposure. The colored Y-axis label is either the level of exposure contrasted against the reference level to  
560 estimate the ATE, or the percentage of the population shifted to the lowest-risk level to estimate the PIE.  
561 Cohort-specific estimates were adjusted for all measured confounders using ensemble machine learning  
562 and TMLE, and then pooled using random effects (Methods). Estimates are shown only for exposures  
563 measured in at least 4 cohorts.

It is made available under a [CC-BY 4.0 International license](https://creativecommons.org/licenses/by/4.0/).

### At-birth child characteristics

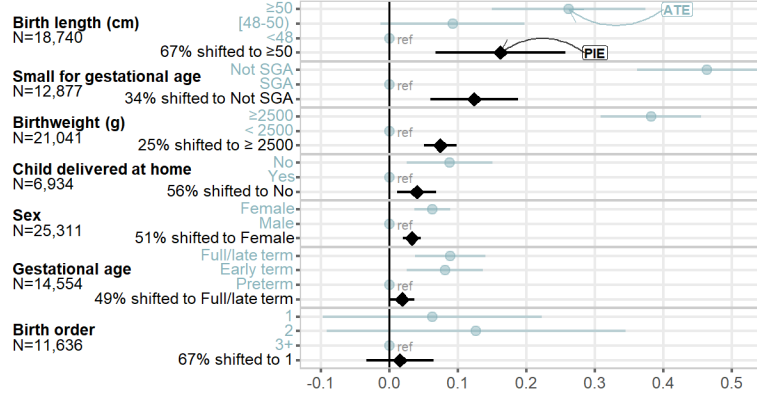

### Postnatal child characteristics

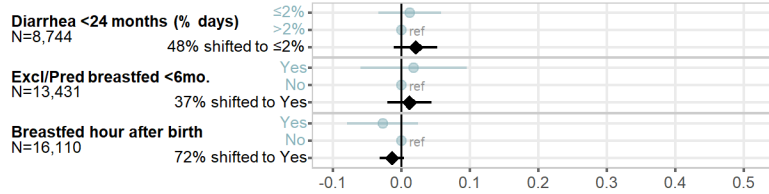

### Parental Characteristics

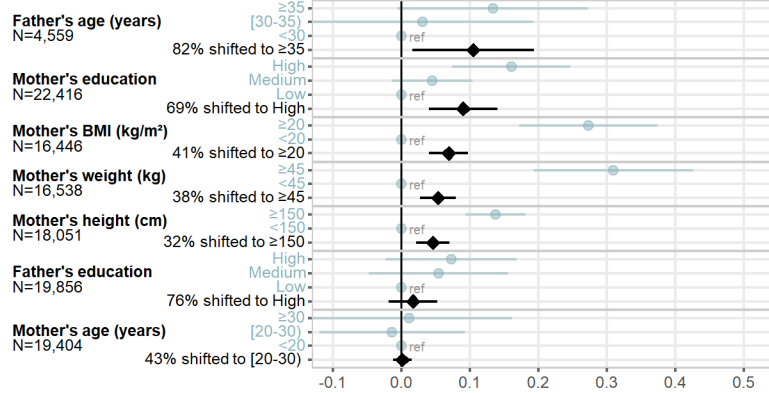

### Household & Environmental Characteristics

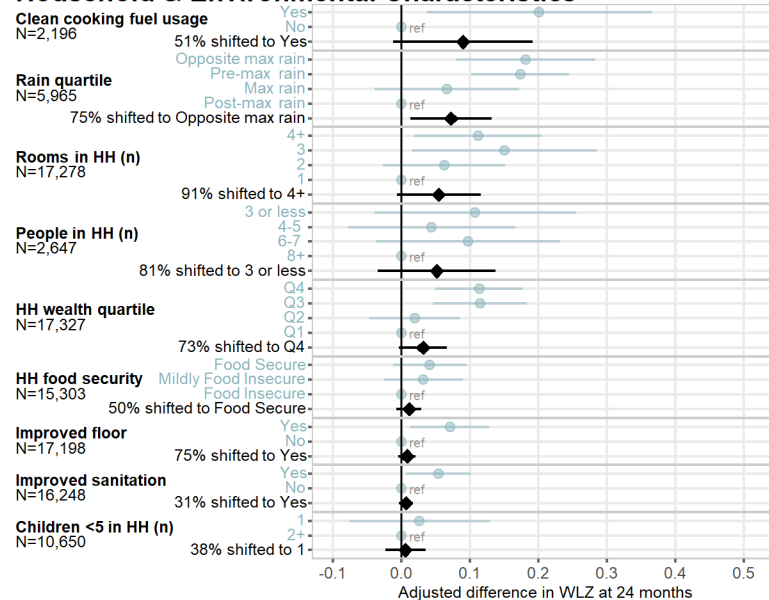

565 **Figure 3. Population intervention effects and mean differences of child, parental,**  
566 **and household exposures on weight-for-length z-scores at age 24 months.**

567 Lighter points show adjusted mean differences (average treatment effects, ATEs), between higher-risk  
568 exposure levels and reference levels, and black points show population intervention effects (PIEs), the  
569 estimated difference in weight-for-length z-scores (WLZ) after shifting exposure levels for all children to  
570 the reference level. The number of children that contributed to each analysis is listed by exposure. The  
571 colored Y-axis label is either the level of exposure contrasted against the reference level to estimate the  
572 ATE, or the percentage of the population shifted to the lowest-risk level to estimate the PIE. Cohort-  
573 specific estimates were adjusted for all measured confounders using ensemble machine learning and  
574 TMLE, and then pooled using random effects (Methods). Estimates are shown only for exposures  
575 measured in at least 4 cohorts.



It is made available under a [CC-BY 4.0 International license](https://creativecommons.org/licenses/by/4.0/).

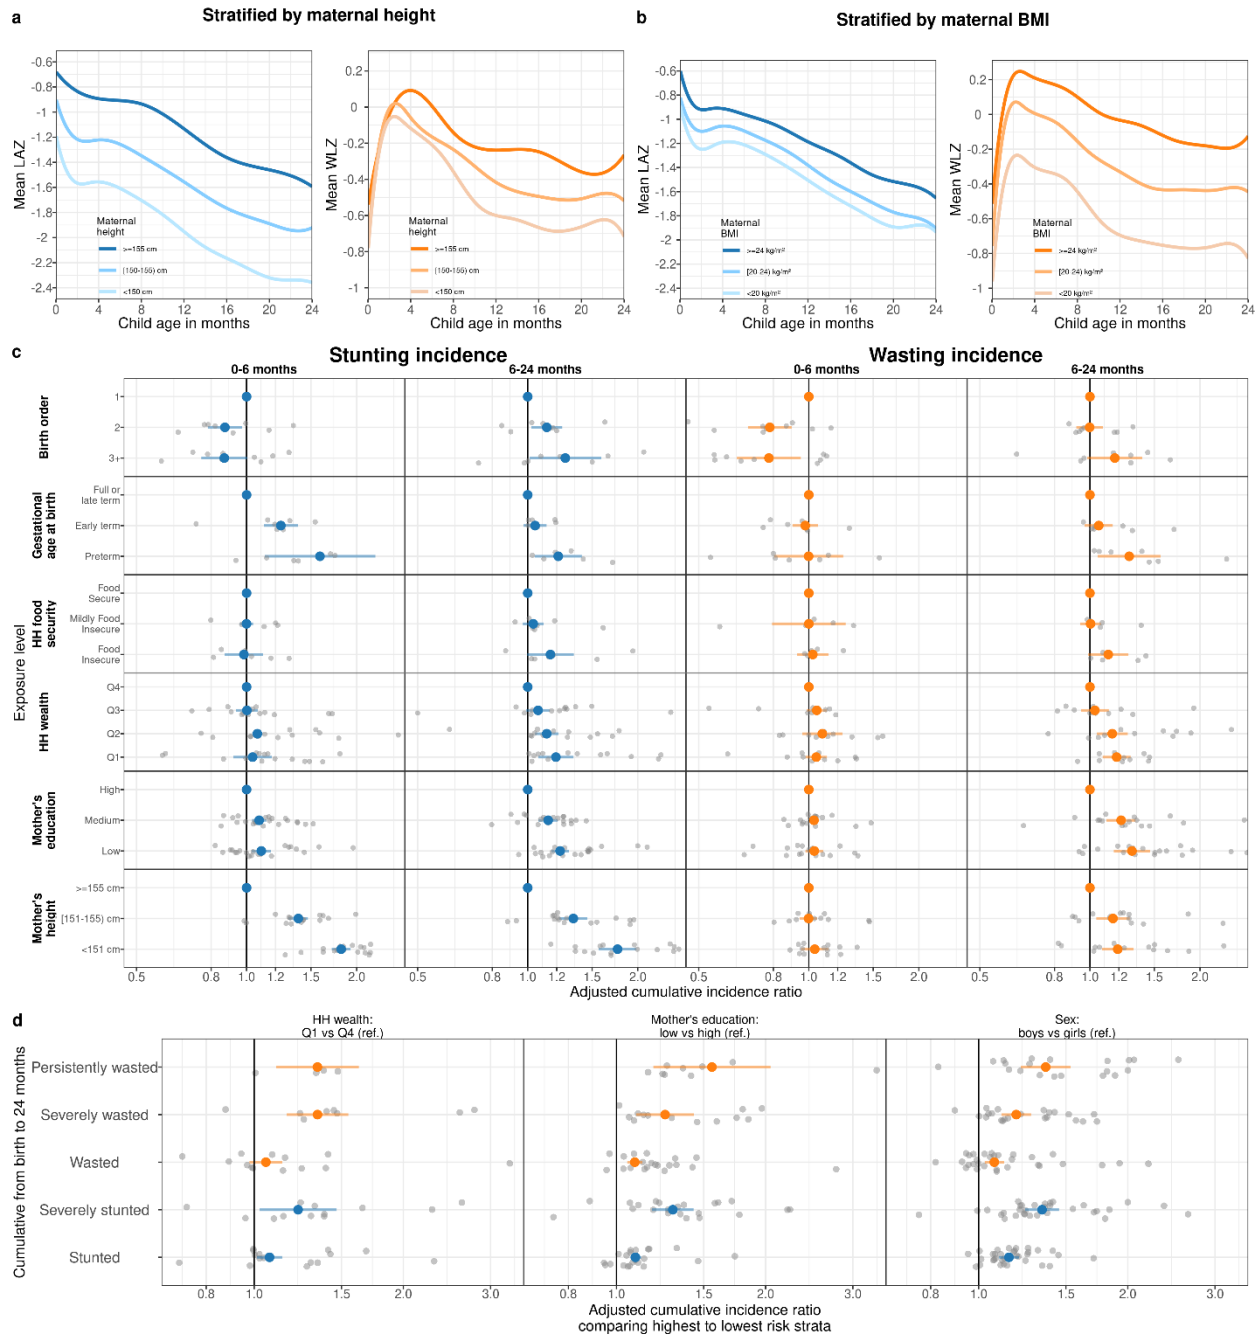

576  
577  
578  
579  
580  
581  
582  
583  
584  
585  
586  
587

**Figure 4. Effect of key exposures on the trajectories, timing, and severity of child growth faltering**

(a) Child length-for-age Z-score (LAZ) and weight-for-length Z-score (WLZ) trajectories, stratified by categories of maternal height (N=413,921 measurements, 65,061 children, 20 studies). (b) Child LAZ and WLZ, stratified by categories of maternal BMI (N=373,382 measurements, 61,933 children, 17 studies). Growth trajectories stratified by all risk factors examined beyond maternal height and BMI are available online (<https://child-growth.github.io/causes/rf-splines.html>). (c) Associations between key exposures and wasting cumulative incidence, stratified by the age of the child during wasting incidence. Gray points indicate cohort-specific estimates. (d) Associations between key exposures and growth faltering of different severity. Cumulative incidence ratios contrast the highest and lowest risk categories of each exposure, which are printed in each panel title. Gray points indicate cohort-specific estimates.

It is made available under a [CC-BY 4.0 International license](https://creativecommons.org/licenses/by/4.0/).

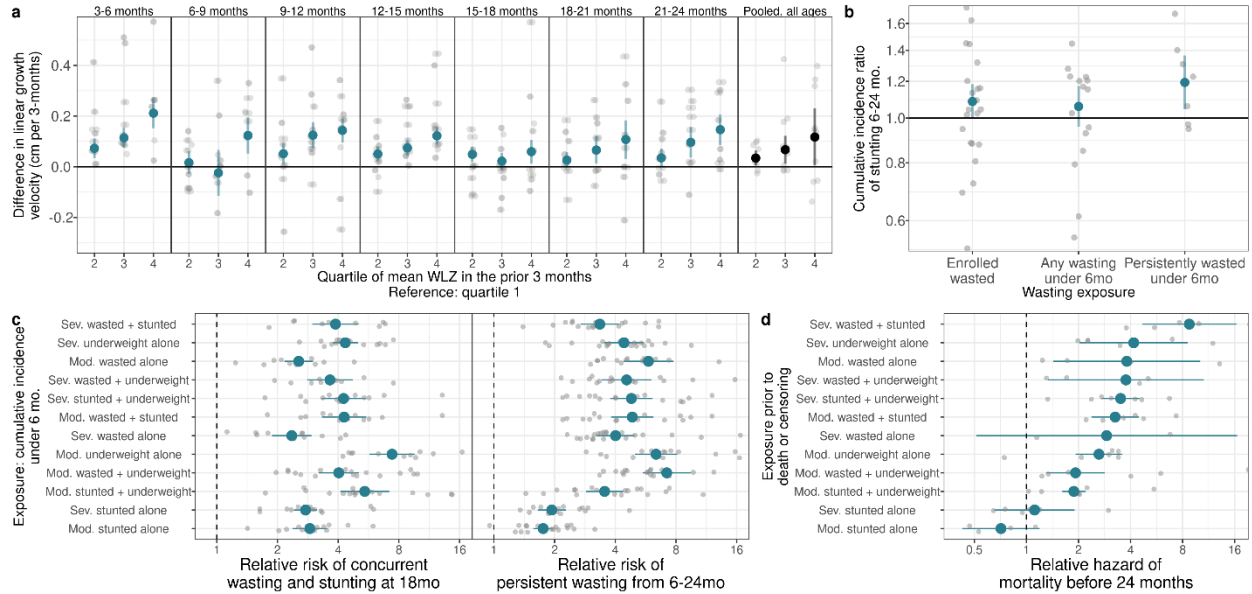

588  
589  
590  
591  
592  
593  
594  
595  
596  
597  
598  
599  
600  
601  
602  
603  
604

**Figure 5. Early life growth faltering increases risk of more severe growth faltering and mortality.**

(a) Adjusted differences in linear growth velocity (in centimeters) across 3-month age bands, by quartile of weight-for-length z-score (WLZ) in the preceding three months. The reference group is children in the first quartile of WLZ in the previous age period. The panel with black points on the far right shows the pooled estimates, unstratified by child age. Velocity was calculated from the closest measurements within 14 days of the start and end of the age period. (b) Relative risk of stunting onset between ages 6-24 months among children who experienced measures of early wasting before age 6 months compared to children who did not. Gray points indicate cohort-specific estimates. (c) Association between cumulative incidence of mutually exclusive definitions of growth faltering before age 6 months (reference: children with no measure of growth failure) and persistent wasting from ages 6-24 months (33 cohorts, 6,046 cases, and 68,645 children) or concurrent wasting and stunting at 18 months. (31 cohorts, 1,447 cases, and 22,565 children). Growth faltering definitions are sorted by estimates in panel d. (d) Hazard ratios between mutually exclusive definitions of growth faltering (reference: children with no measure of growth failure) and mortality before 24 months (8 cohorts, 1,689 deaths with ages of death, and 63,812 children). Gray points indicate cohort-specific estimates.

It is made available under a [CC-BY 4.0 International license](https://creativecommons.org/licenses/by/4.0/).

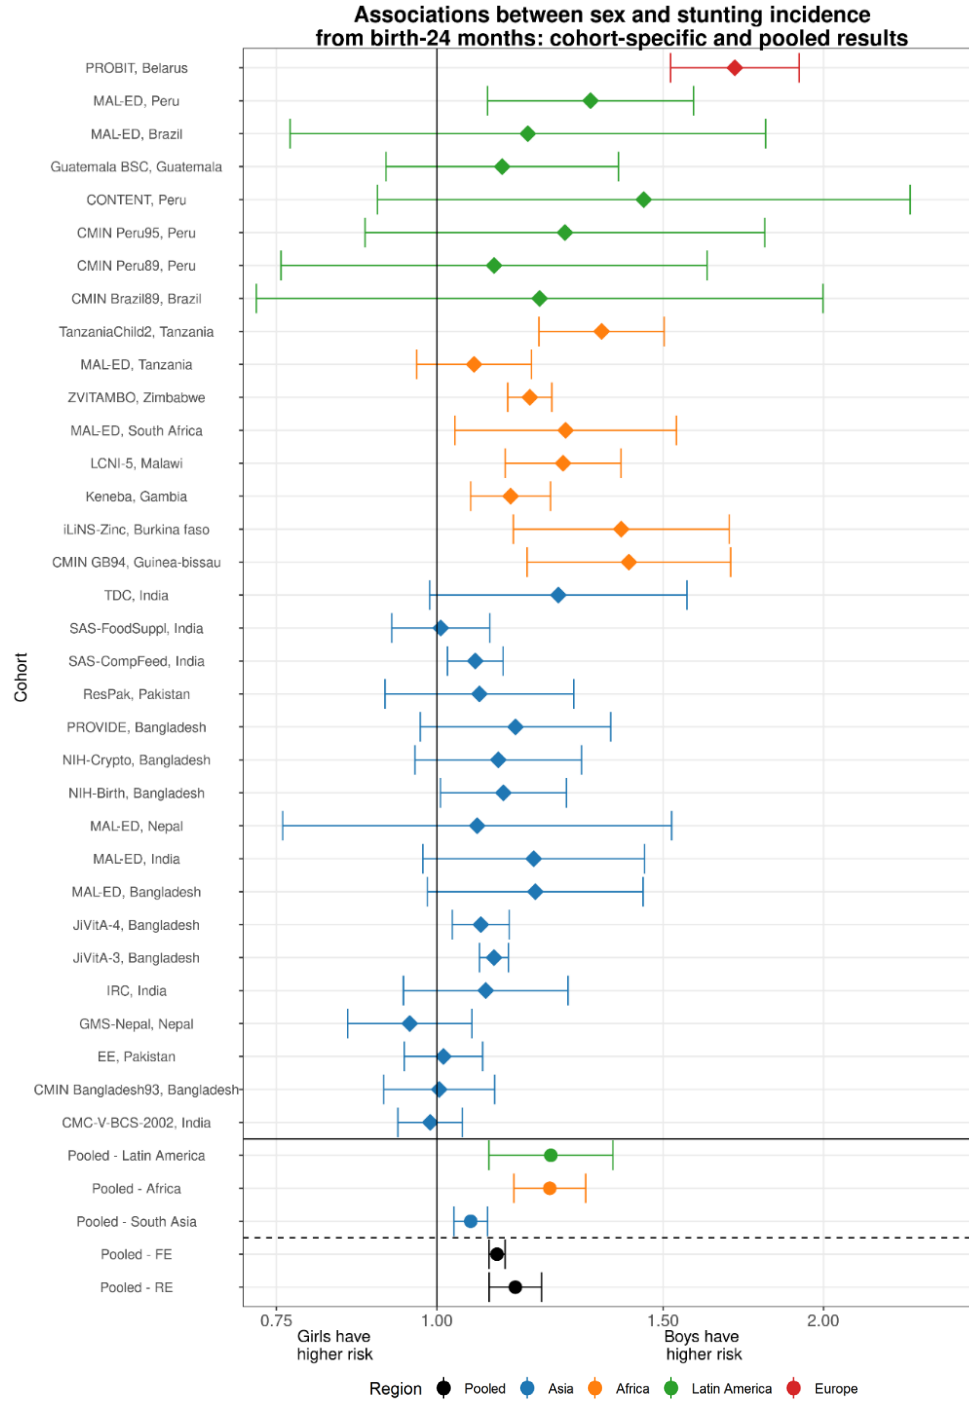

605

606

607 **Extended Data Figure 1. Example forest plot of cohort-specific and pooled**  
 608 **parameter estimates**

609 Cohort-specific estimates of the cumulative incidence ratio of stunting are plotted on each row, comparing  
 610 the risk of any stunting from birth to 24 months among boys compared to a reference level of girls. Below  
 611 the solid horizontal line are region-specific pooled measures of association, pooled using random-effects  
 612 models. Below the dashed line are overall pooled measures of association, comparing pooling using  
 613 random or fixed effects models. The primary results reported throughout the manuscript are overall (not  
 614 region stratified) estimates pooled using random effects models.

It is made available under a [CC-BY 4.0 International license](https://creativecommons.org/licenses/by/4.0/).

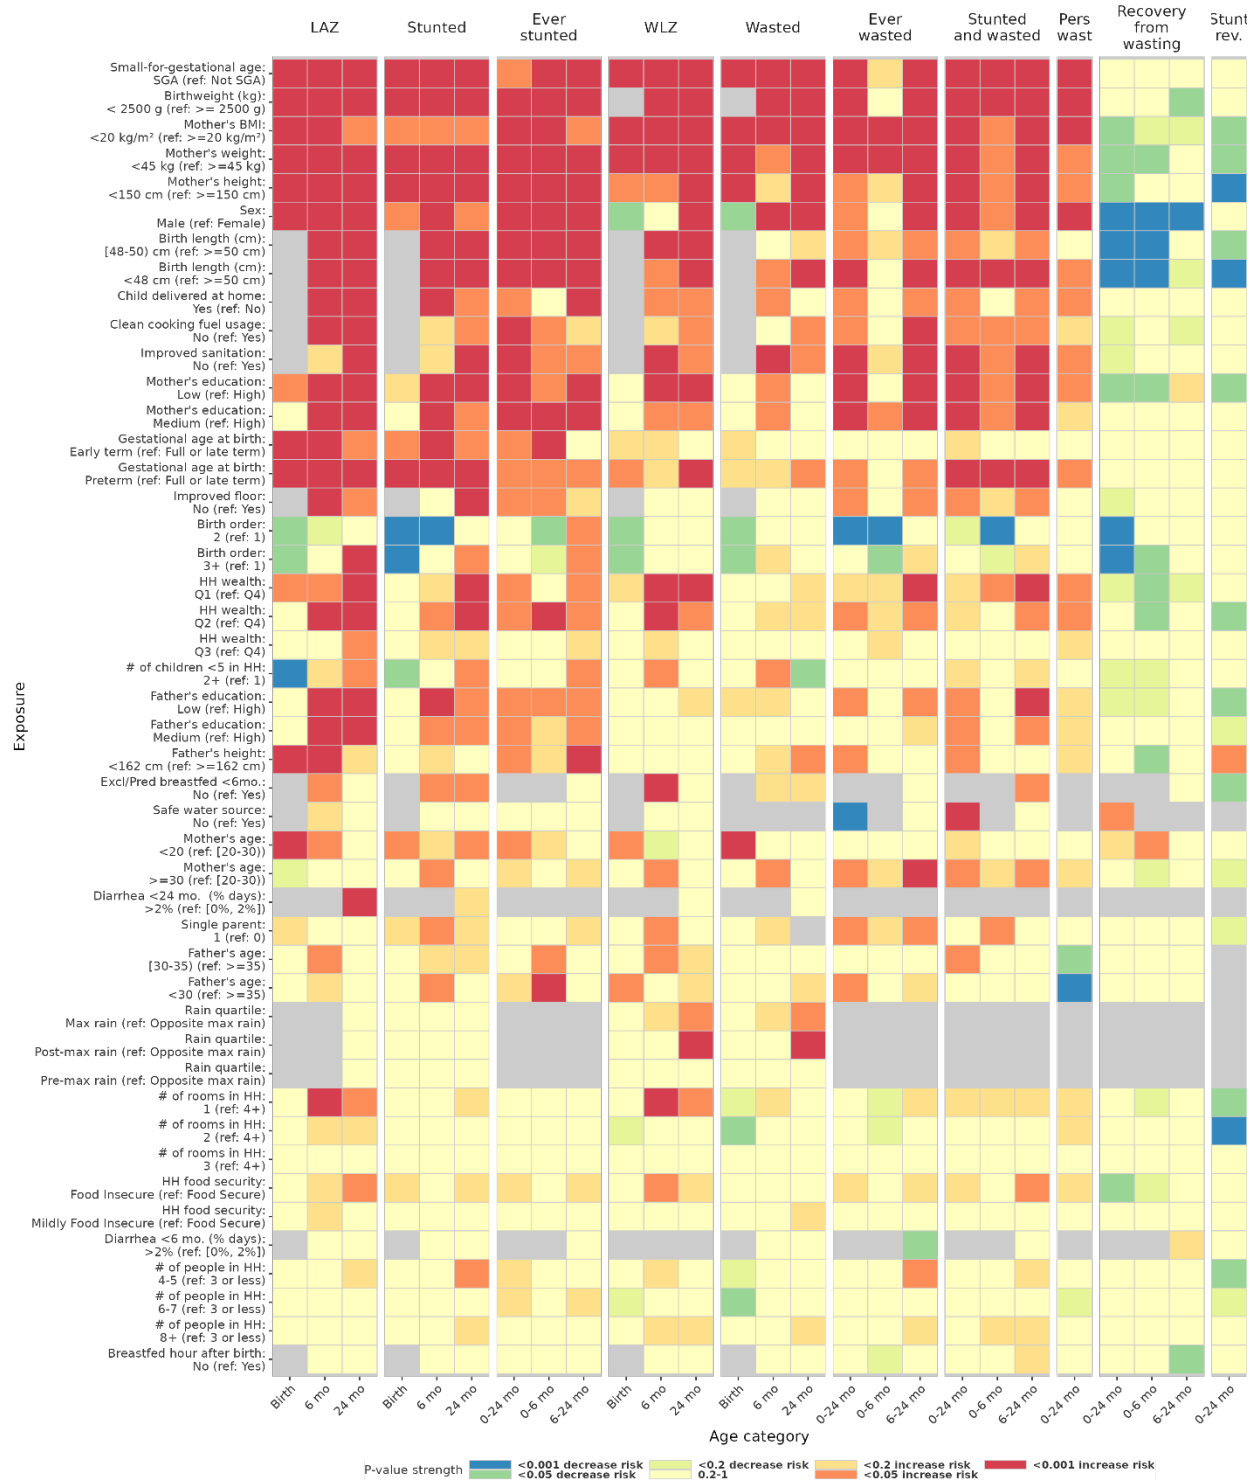

615  
616  
617  
618  
619  
620

**Extended Data Figure 2. Heatmap of significance and direction across exposure-outcome combinations.**

The heatmap shows the significance and direction of estimates through the cell colors, separated across primary outcomes by child age. Red and orange cells are exposures where the outcome is estimated have an increased probability of occurring compared to the reference level (harmful exposures except for

621 recovery outcomes), while blue and green cells are exposures associated with a decreased probability of  
622 the outcome (protective exposures except for recovery outcomes). The outcomes are labeled at the top of  
623 the columns, with each set of three columns the set of three ages analyzed for that outcome. Each row is  
624 a level of an exposure variable, with reference levels excluded. Rows are sorted top to bottom by  
625 increasing average p-value. Grey cells denote comparisons that were not estimated or could not be  
626 estimated because of data sparsity in the exposure-outcome combination. All point estimates and  
627 confidence intervals for exposure-outcome pairs with P-values plotted in this figure are viewable online at  
628 (<https://child-growth.github.io/causes>).



It is made available under a [CC-BY 4.0 International license](https://creativecommons.org/licenses/by/4.0/).

## Population intervention effect - LAZ, stratified by age

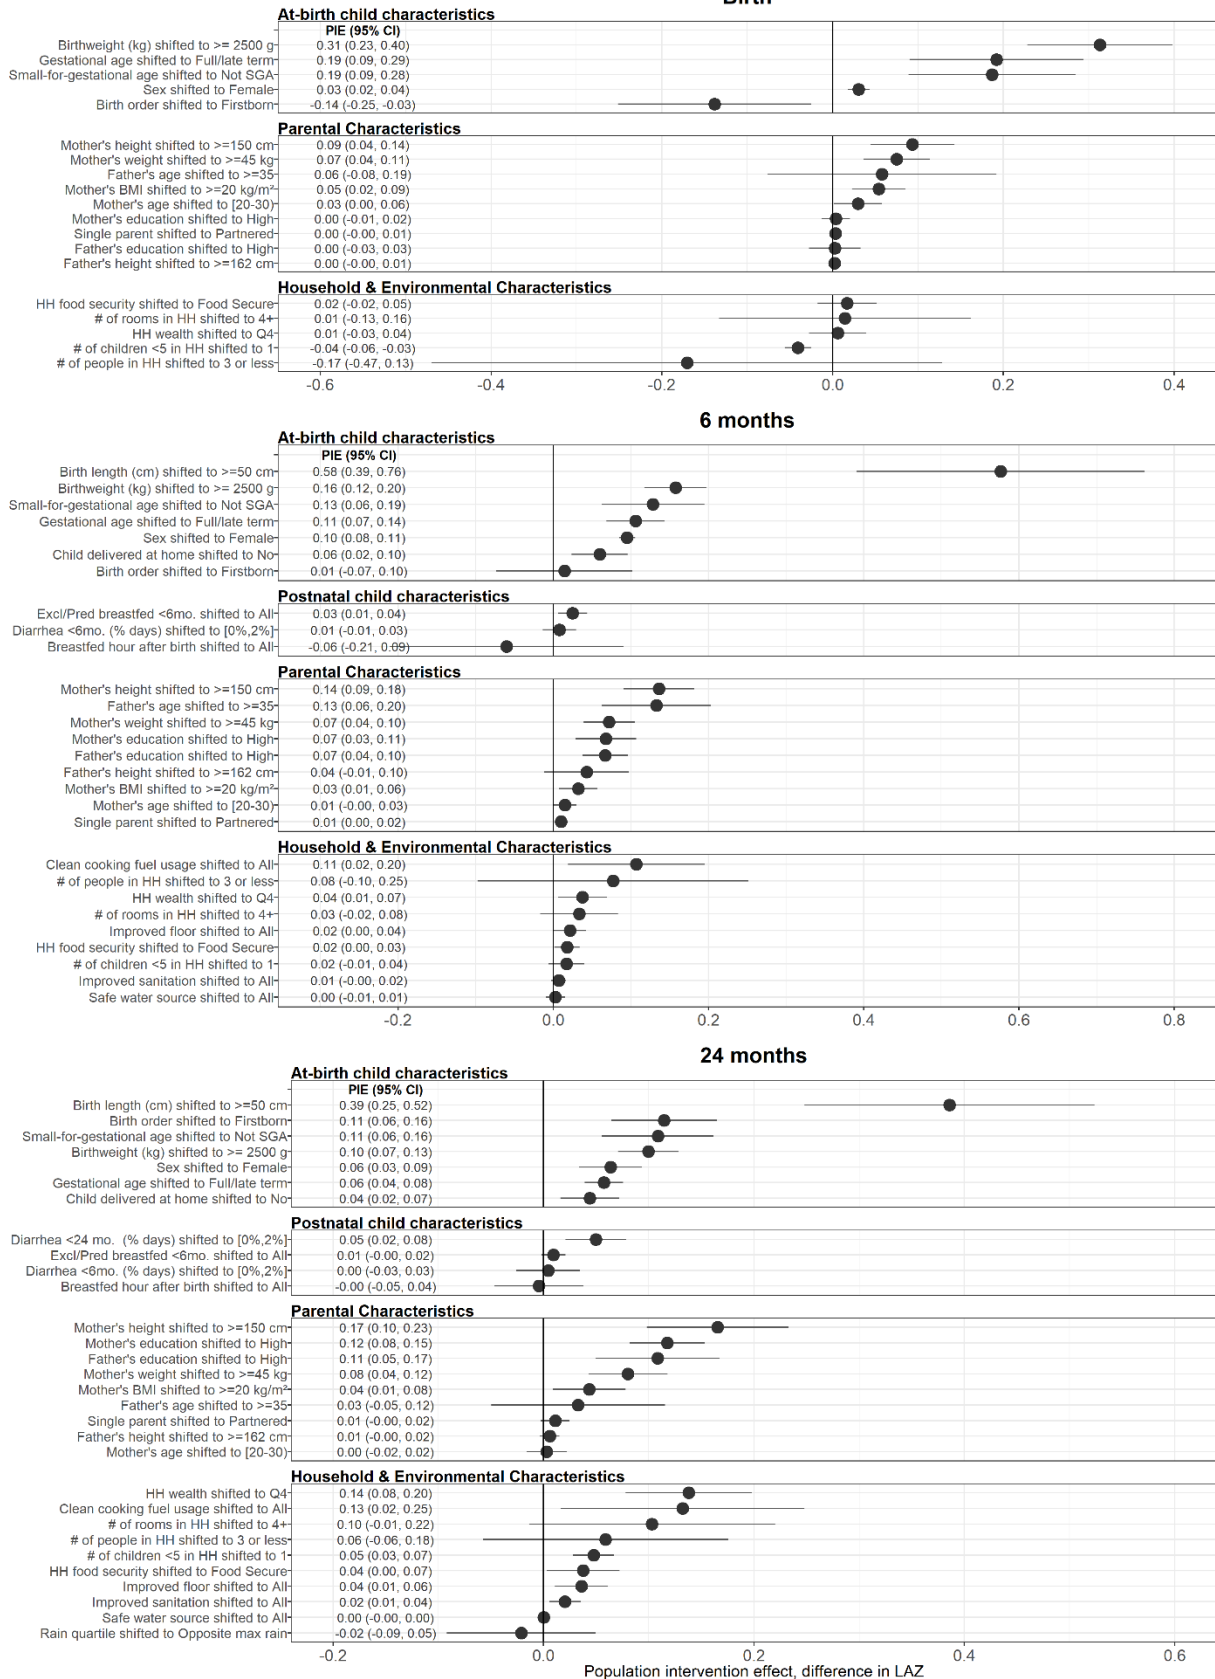

630 **Extended Data Figure 3. Age-stratified population intervention effects in length-**  
631 **for-age Z-scores.**

632 Exposures, rank ordered by population intervention effect on child LAZ, stratified by the  
633 age of the child at the time of anthropometry measurement. The population intervention  
634 effect is the expected difference in mean Z-score if all children had the reference level  
635 of the exposure rather than the observed exposure distribution. Reference levels are  
636 printed in the exposure label. Cohort-specific estimates were adjusted for all measured  
637 confounders using ensemble machine learning and TMLE, and then pooled using  
638 random effects (Methods). Estimates are shown only for exposures measured in at least  
639 4 cohorts.

640

It is made available under a [CC-BY 4.0 International license](https://creativecommons.org/licenses/by/4.0/).

## Population intervention effect - WLZ, stratified by age

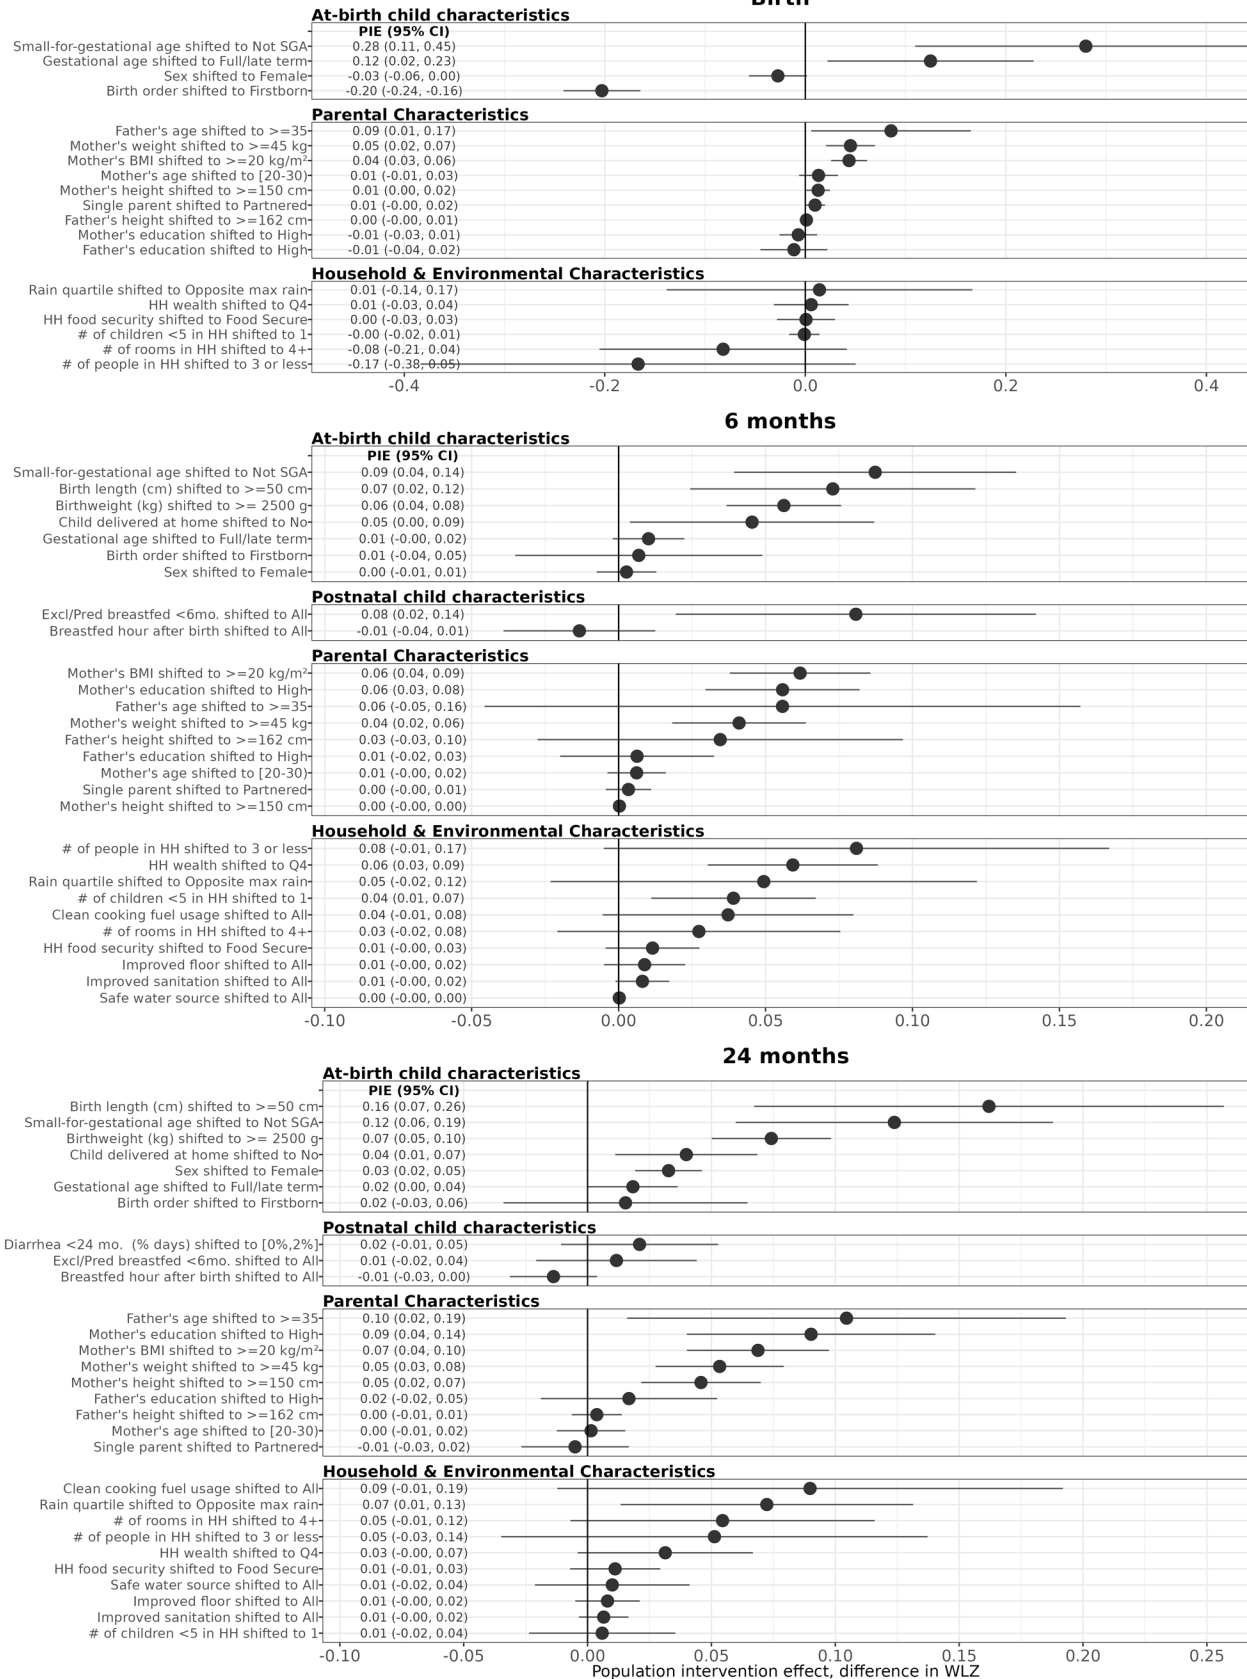

642 **Extended Data Figure 4. Age-stratified population intervention effects in weight-**  
643 **for-length Z-scores.**

644 Exposures, rank ordered by population intervention effects on child WLZ,, stratified by  
645 the age of the child at the time of anthropometry measurement. The population  
646 intervention effect is the expected difference in population mean Z-score if all children  
647 had the reference level of the exposure rather than the observed distribution. For all  
648 plots, reference levels are printed next to the name of the exposure. Cohort-specific  
649 estimates were adjusted for all measured confounders using ensemble machine  
650 learning and TMLE, and then pooled using random effects (Methods). Estimates are  
651 shown only for exposures measured in at least 4 cohorts.

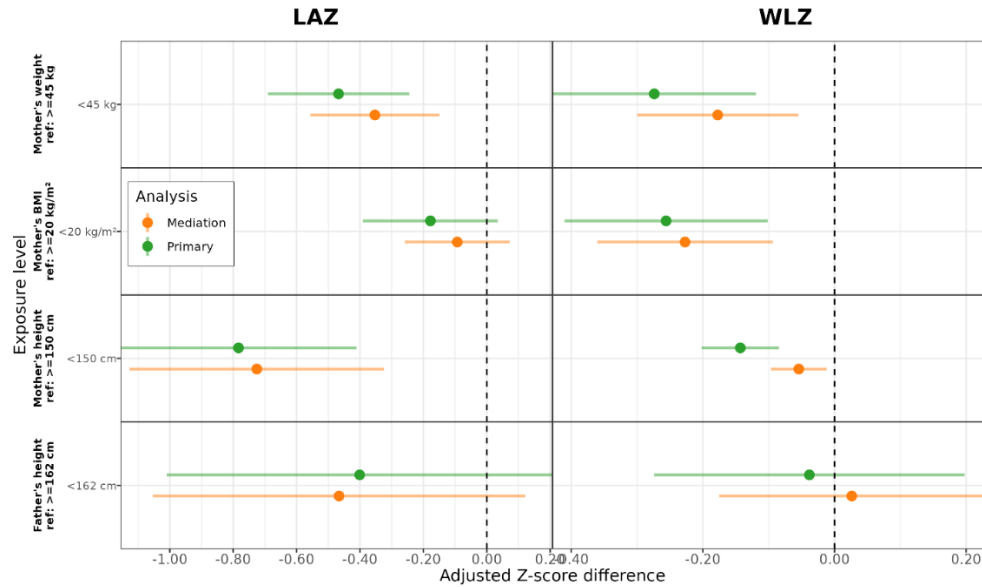

652

653

654

### Extended Data Figure 5. Mediation of parental anthropometry effects by birth size on child Z-scores at 24 months.

655

656

657

658

659

660

661

662

663

664

Mediating effect of adjusting for birth anthropometry and at-birth characteristics on the estimated Z-score differences between levels of parental anthropometry. Primary estimates were adjusted for all other measured exposures not on the causal pathway, while the mediation analysis estimates were additionally adjusted for birthweight, birth length, gestational age at birth, birth order, small-for-gestational age status, and home vs. hospital delivery. Only estimates from cohorts measuring at least 3 of the 6 at-birth characteristics were used to estimate the pooled Z-score differences (n = 6 cohorts, 17,124 observations). Mediation estimates were slightly attenuated toward the null, and only in the case of maternal height and child WLZ were they statistically different from the primary analysis. These results imply that the causal pathway between parental anthropometry and growth faltering operates through its effect on birth size, but most of the effect is through other pathways.

It is made available under a [CC-BY 4.0 International license](https://creativecommons.org/licenses/by/4.0/).

### At-birth child characteristics

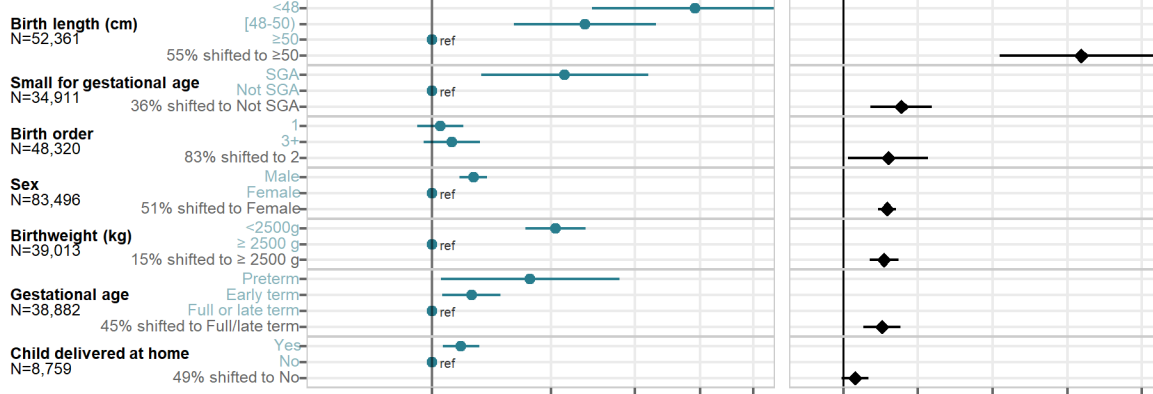

### Postnatal child characteristics

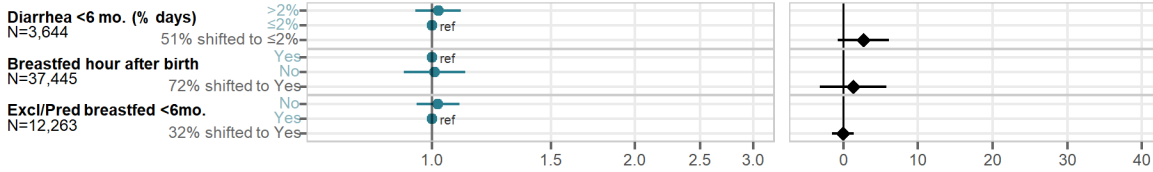

### Parental Characteristics

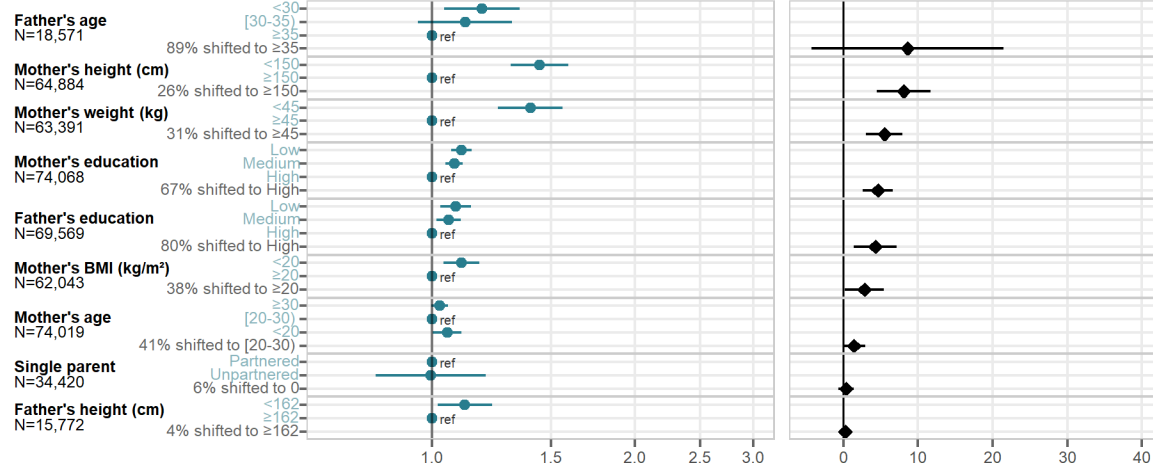

### Household & Environmental Characteristics

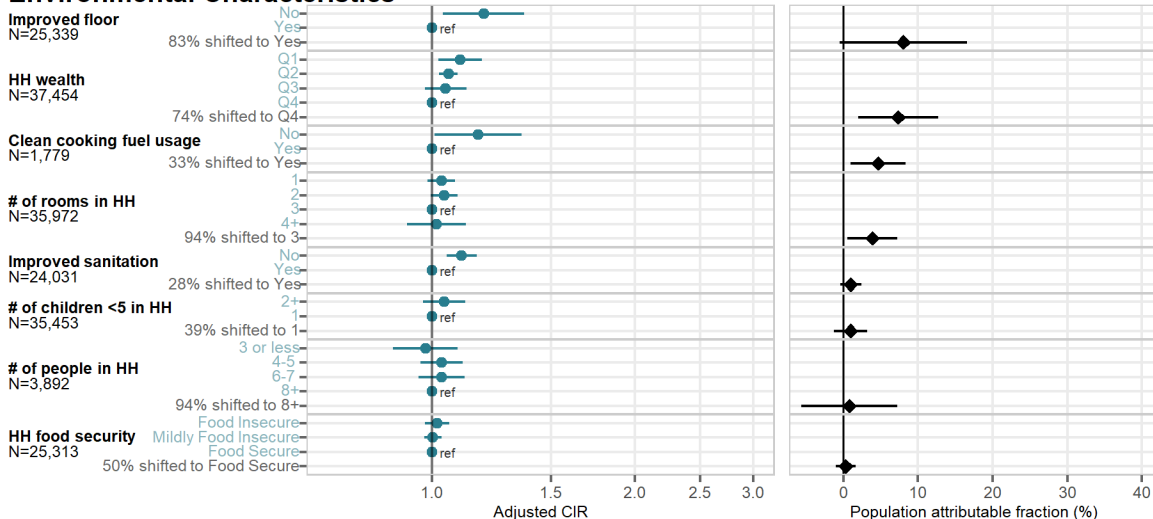

666 **Extended Data Figure 6. Rank-ordered associations between child, parental, and**  
667 **household characteristics and adjusted relative risks or population attributable**  
668 **fractions of stunting by age 24 months.**

669 Blue points in the left panel show adjusted cumulative incidence ratios (CIRs) between higher-risk  
670 exposure levels and reference levels, and black points in the right panel show population attributable  
671 fractions (PAFs), the estimated proportion of the risk in the whole population that would be removed if the  
672 exposure were set to its indicated reference level. The number of children that contributed to each  
673 analysis is listed by exposure. The colored Y-axis label is either the level of exposure contrasted against  
674 the reference level to estimate the CIR, or the percent of the population shifted to the lowest-risk level to  
675 estimate the PAF. For at-birth exposures, at-birth stunting and wasting were excluded to focus on  
676 incidence of new (postnatal) cases, and for postnatal exposures (breastfeeding practice and diarrheal  
677 disease), the cumulative incidence of stunting from 6-24 months was used. Cohort-specific estimates  
678 were adjusted for all measured confounders using ensemble machine learning and TMLE, and then  
679 pooled using random effects (Methods). Estimates are shown only for exposures measured in at least 4  
680 studies.



It is made available under a [CC-BY 4.0 International license](https://creativecommons.org/licenses/by/4.0/).

### At-birth child characteristics

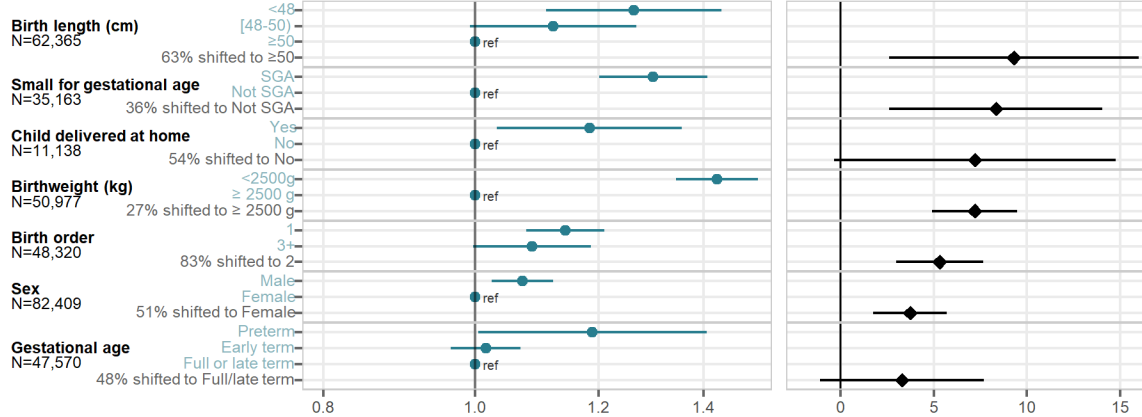

### Postnatal child characteristics

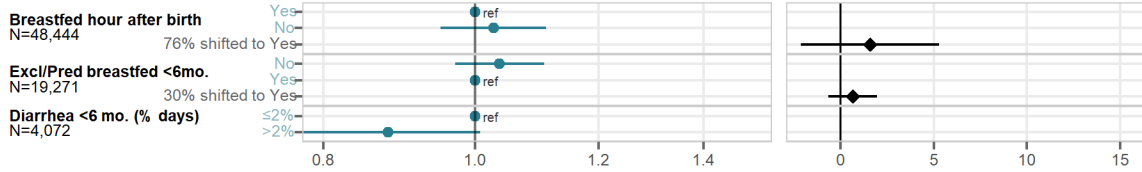

### Parental Characteristics

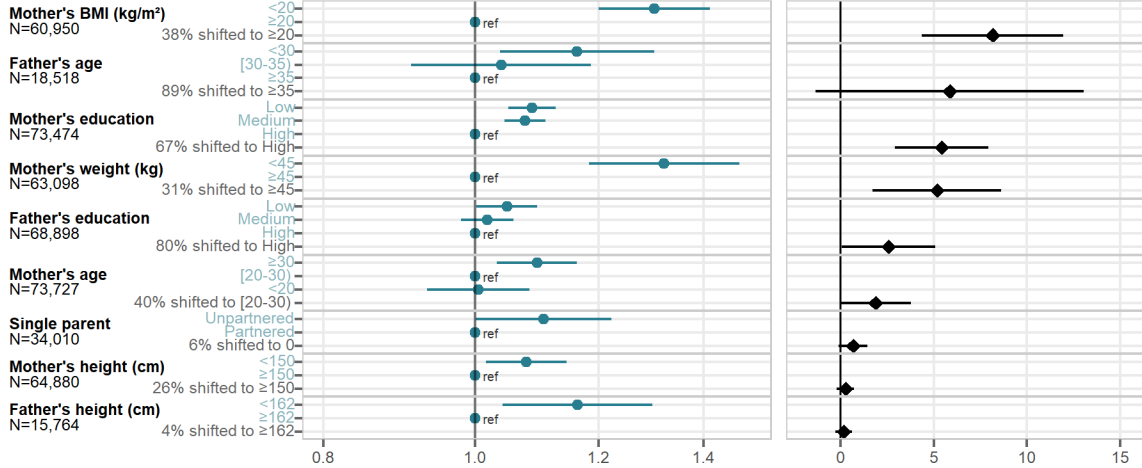

### Household & Environmental Characteristics

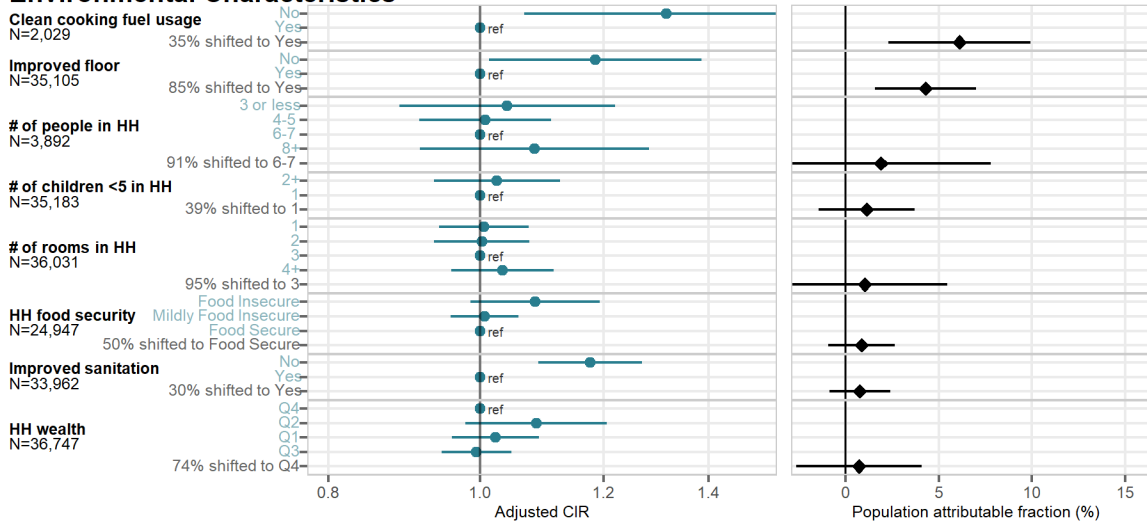

682 **Extended Data Figure 7. Rank-ordered associations between child, parental, and**  
683 **household characteristics and adjusted relative risks or population attributable**  
684 **fractions of wasting by age 24 months.**

685 Blue points in the left panel show adjusted cumulative incidence ratios (CIRs) between higher-risk  
686 exposure levels and reference levels, and black points in the right panel show population attributable  
687 fractions (PAFs), the estimated proportion of the risk in the whole population that would be removed if the  
688 exposure were set to its indicated reference level. The number of children that contributed to each  
689 analysis is listed by exposure. The colored Y-axis label is either the level of exposure contrasted against  
690 the reference level to estimate the CIR, or the percent of the population shifted to the lowest-risk level to  
691 estimate the PAF. For at-birth exposures, at-birth stunting and wasting were excluded, and for postnatal  
692 exposures (breastfeeding practice and diarrheal disease), the cumulative incidence of wasting from 6-24  
693 months was used. Cohort-specific estimates were adjusted for all measured confounders using ensemble  
694 machine learning and TMLE, and then pooled using random effects (Methods). Estimates are shown only  
695 for exposures measured in at least 4 studies. The PAF for diarrhea under 6 months was not calculable or  
696 plotted due to the unexpected CIR <1 for estimated higher diarrheal disease burden.

It is made available under a [CC-BY 4.0 International license](https://creativecommons.org/licenses/by/4.0/).

## Population intervention effect - LAZ, stratified by region

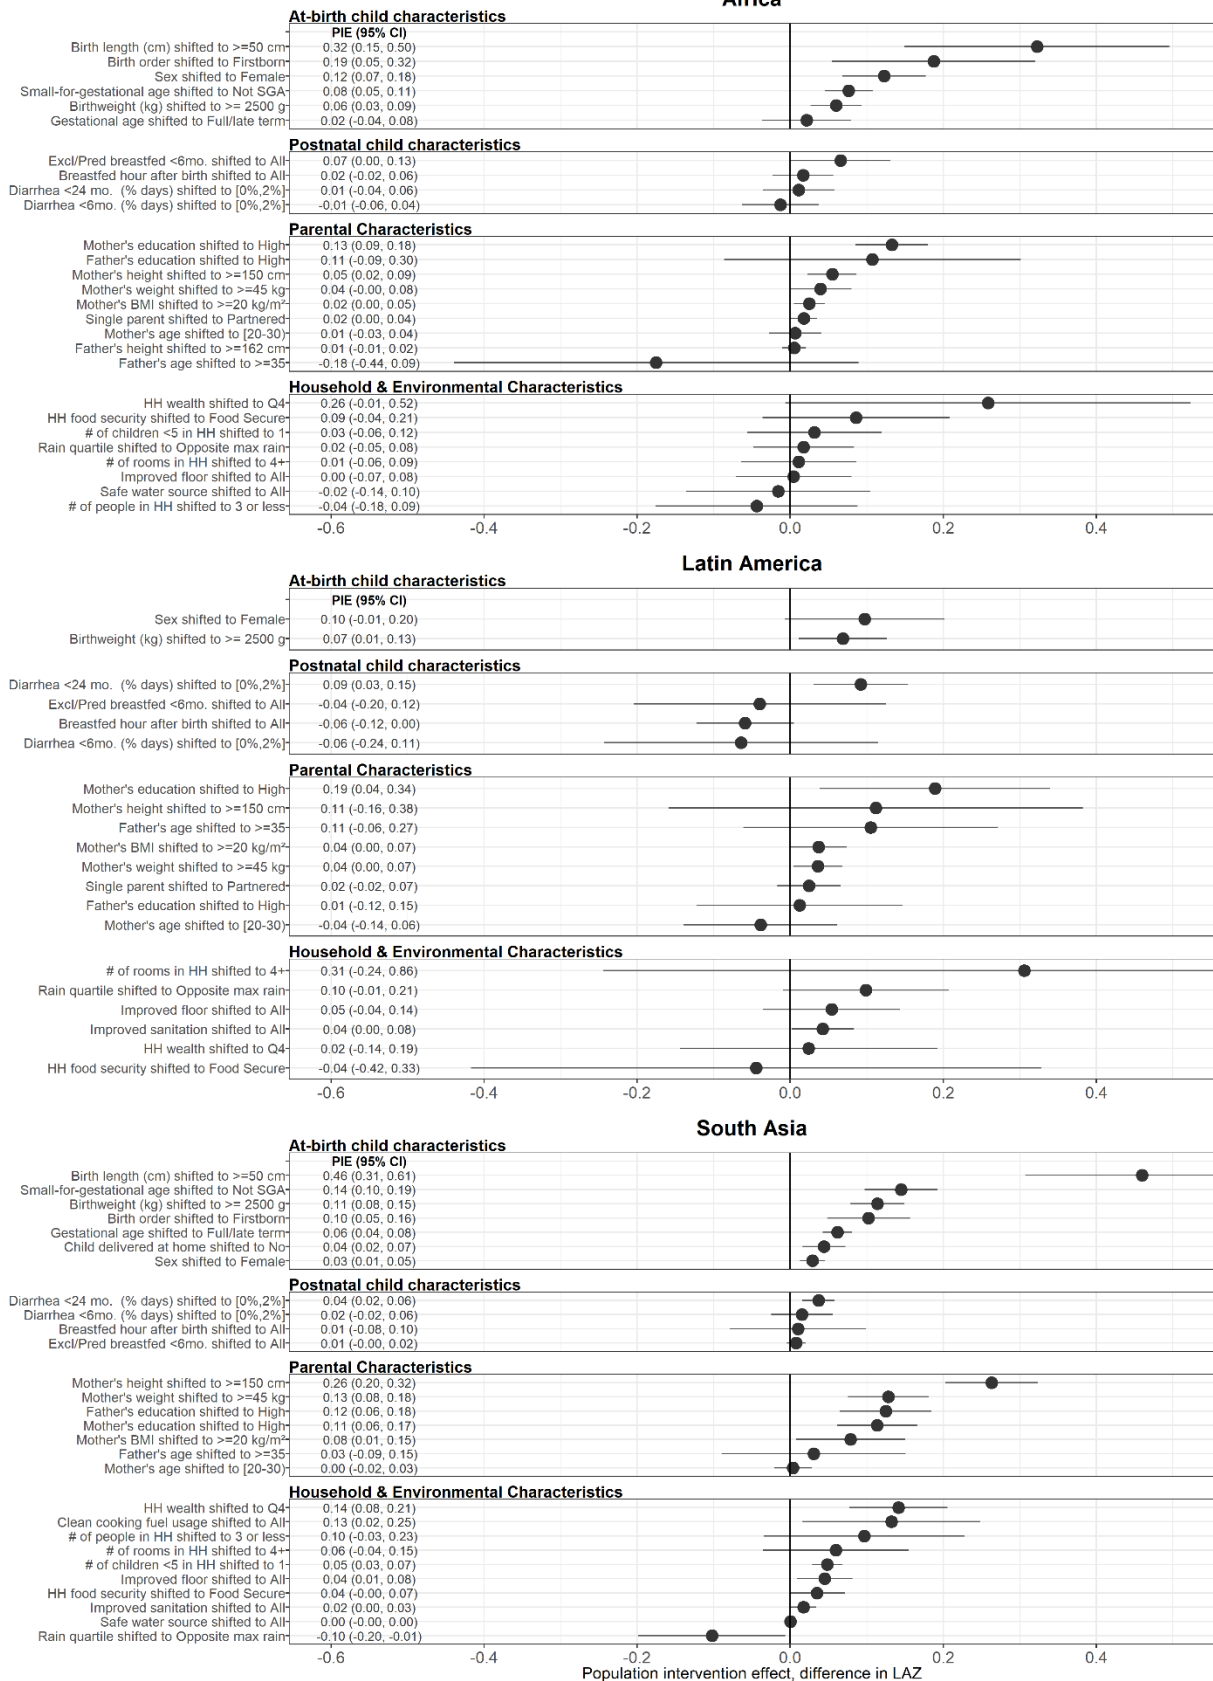

698 **Extended Data Figure 8. Regionally-stratified population intervention effects for**  
699 **length-for-age Z-scores at age 24 months.**

700 Exposures, rank ordered by population intervention effect on child length-for-age z-score (LAZ) at age 24  
701 months, stratified by region. The population intervention effect is the expected difference in population  
702 mean Z-score if all children had the reference level of the exposure rather than the observed distribution.  
703 For all plots, reference levels are printed next to the name of the exposure. Cohort-specific estimates  
704 were adjusted for all measured confounders using ensemble machine learning and TMLE, and then  
705 pooled using random effects (Methods). Estimates are shown only for exposures measured in at least 4  
706 cohorts.

It is made available under a [CC-BY 4.0 International license](https://creativecommons.org/licenses/by/4.0/).

## Population intervention effect - WLZ, stratified by region

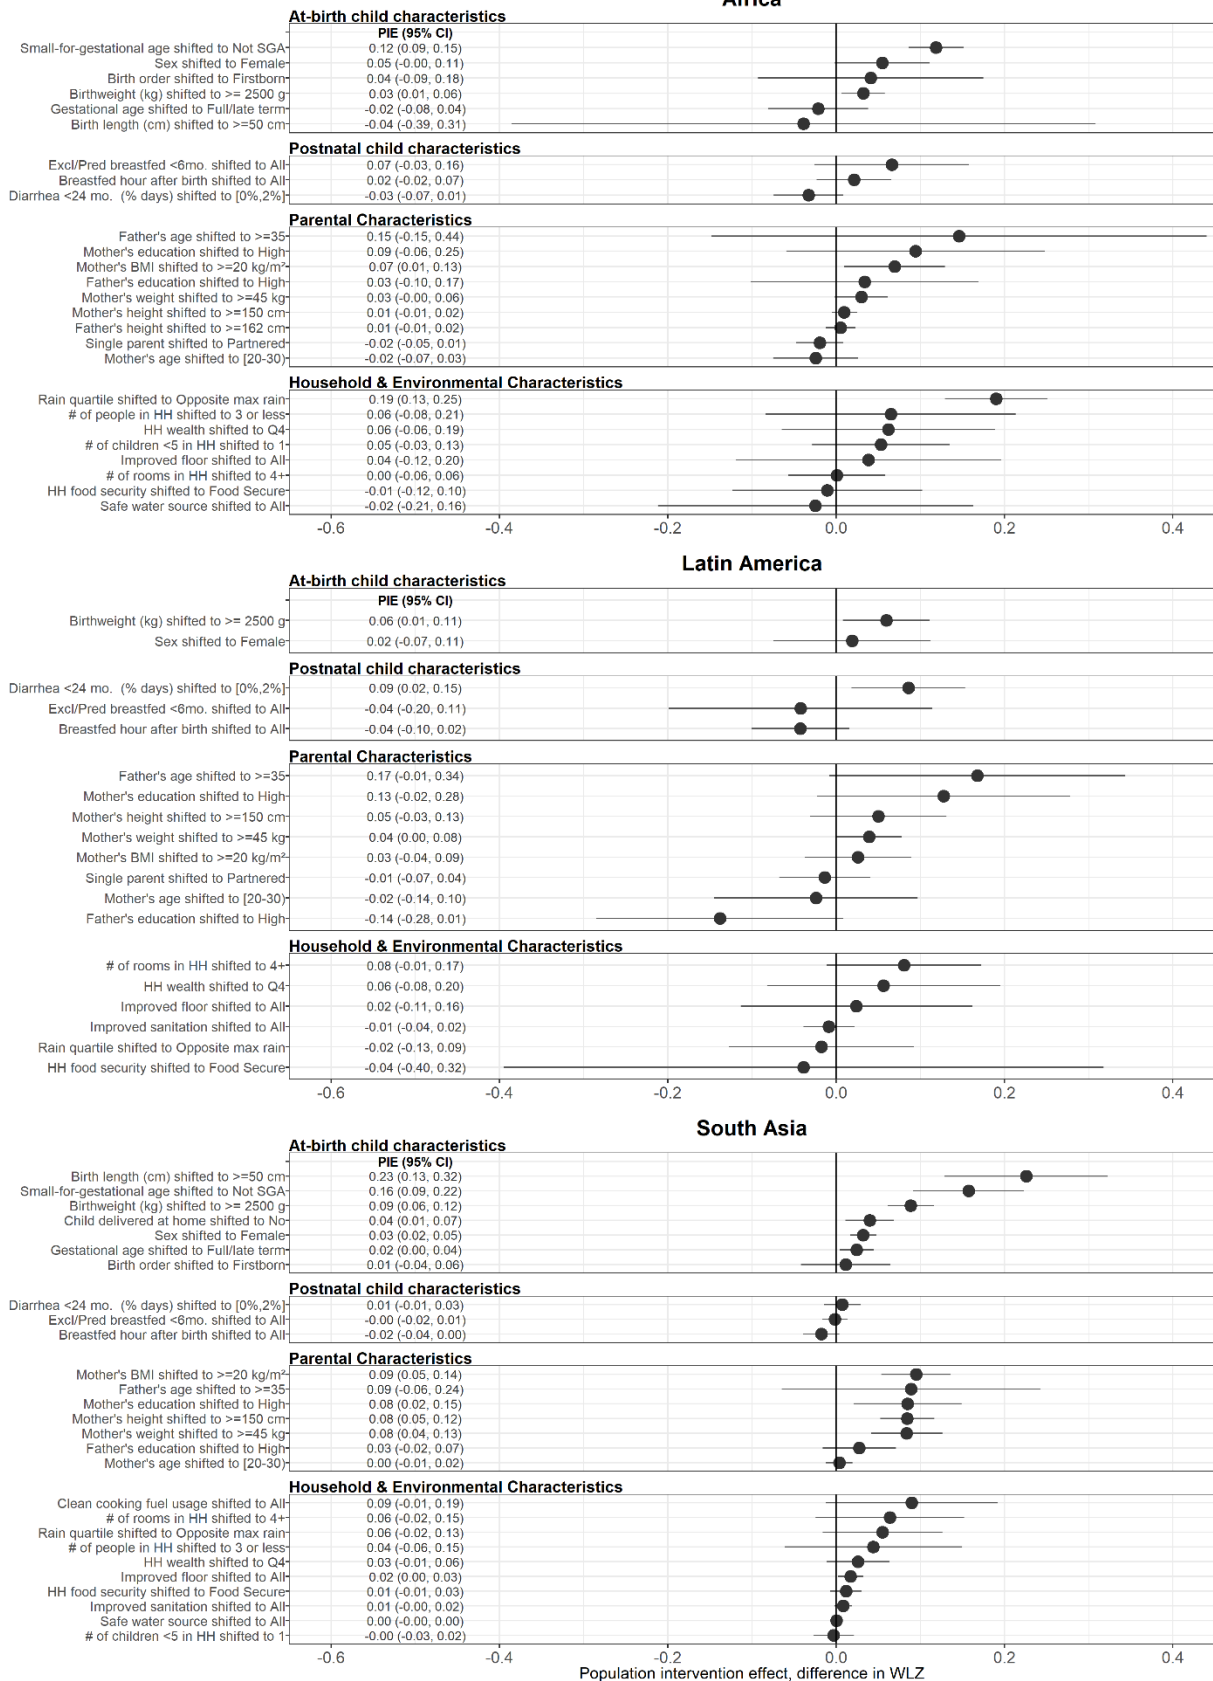

708 **Extended Data Figure 9. Regionally-stratified population intervention effects for**  
709 **weight-for-length Z-scores at age 24 months.**

710 Exposures, rank ordered by population attributable difference on child weight-for-length z-score (WLZ) at  
711 age 24 months, stratified by region. The population intervention effect is the expected difference in  
712 population mean Z-score if all children had the reference level of the exposure rather than the observed  
713 distribution. For all plots, reference levels are printed next to the name of the exposure. Cohort-specific  
714 estimates were adjusted for all measured confounders using ensemble machine learning and TMLE, and  
715 then pooled using random effects (Methods). Estimates are shown only for exposures measured in at  
716 least 4 cohorts.

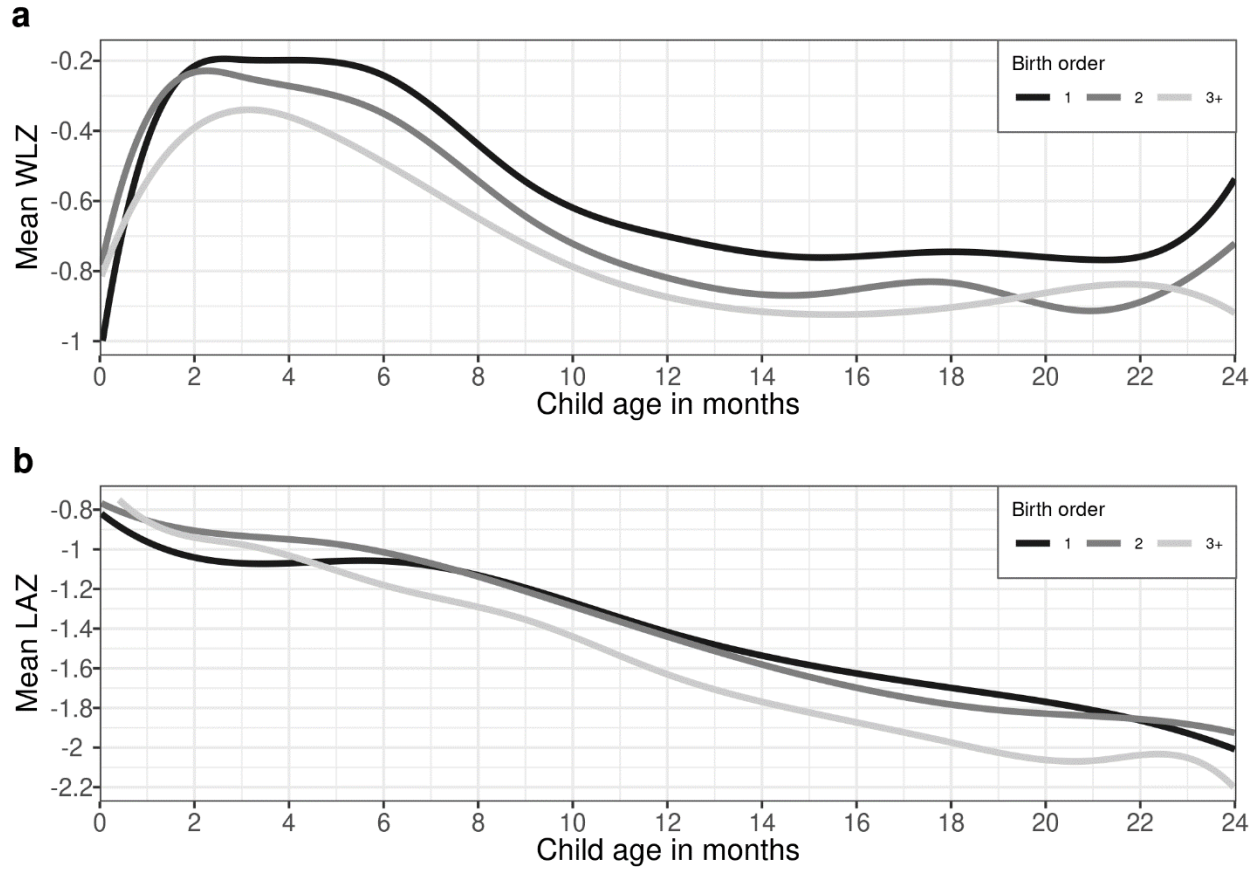

717

718

**Extended Data Figure 10. Child growth trajectories stratified by birth order**

719

(a) Child weight-for-length Z-score (WLZ) trajectories, stratified by categories of child birth order.

720

(b) Child length-for-age Z-score (LAZ) trajectories, stratified by categories of child birth order. Details

721

on the estimation of growth trajectories are in the Methods. Child growth trajectories stratified by

722

categories of all risk factors are available online ([https://child-growth.github.io/causes/rf-](https://child-growth.github.io/causes/rf-splines.html)

723

[splines.html](https://child-growth.github.io/causes/rf-splines.html)).



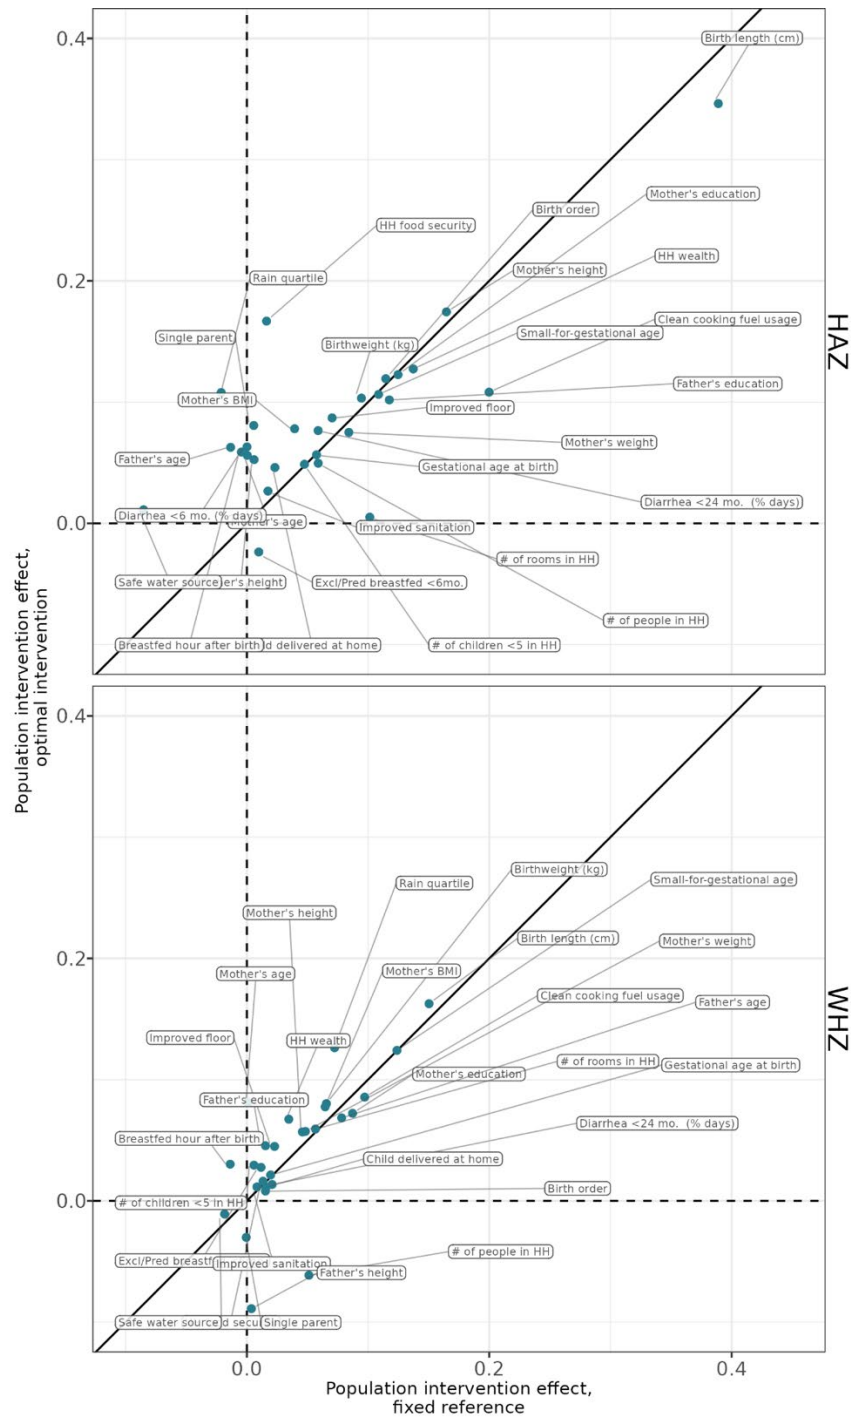

724  
 725 **Extended Data Figure 11 Comparing fixed-reference and optimal intervention**  
 726 **estimates of the population intervention effect.**  
 727 Pooled population intervention effects on child LAZ and WHZ at 24 months, with the X-axis showing  
 728 attributable differences using a fixed, and the Y-axis showing the optimal intervention attributable  
 729 difference, where the level the exposure is shifted to can vary by child. Points are labeled with the specific  
 730 risk factor. Estimates farther from the diagonal line have larger differences between the static and optimal  
 731 intervention estimates. The optimal intervention attributable differences, which are not estimated with an  
 732 a-priori specified low-risk reference level, were generally close to the static attributable differences,  
 733 indicating that the chosen reference levels were the lowest risk strata in most or all children.

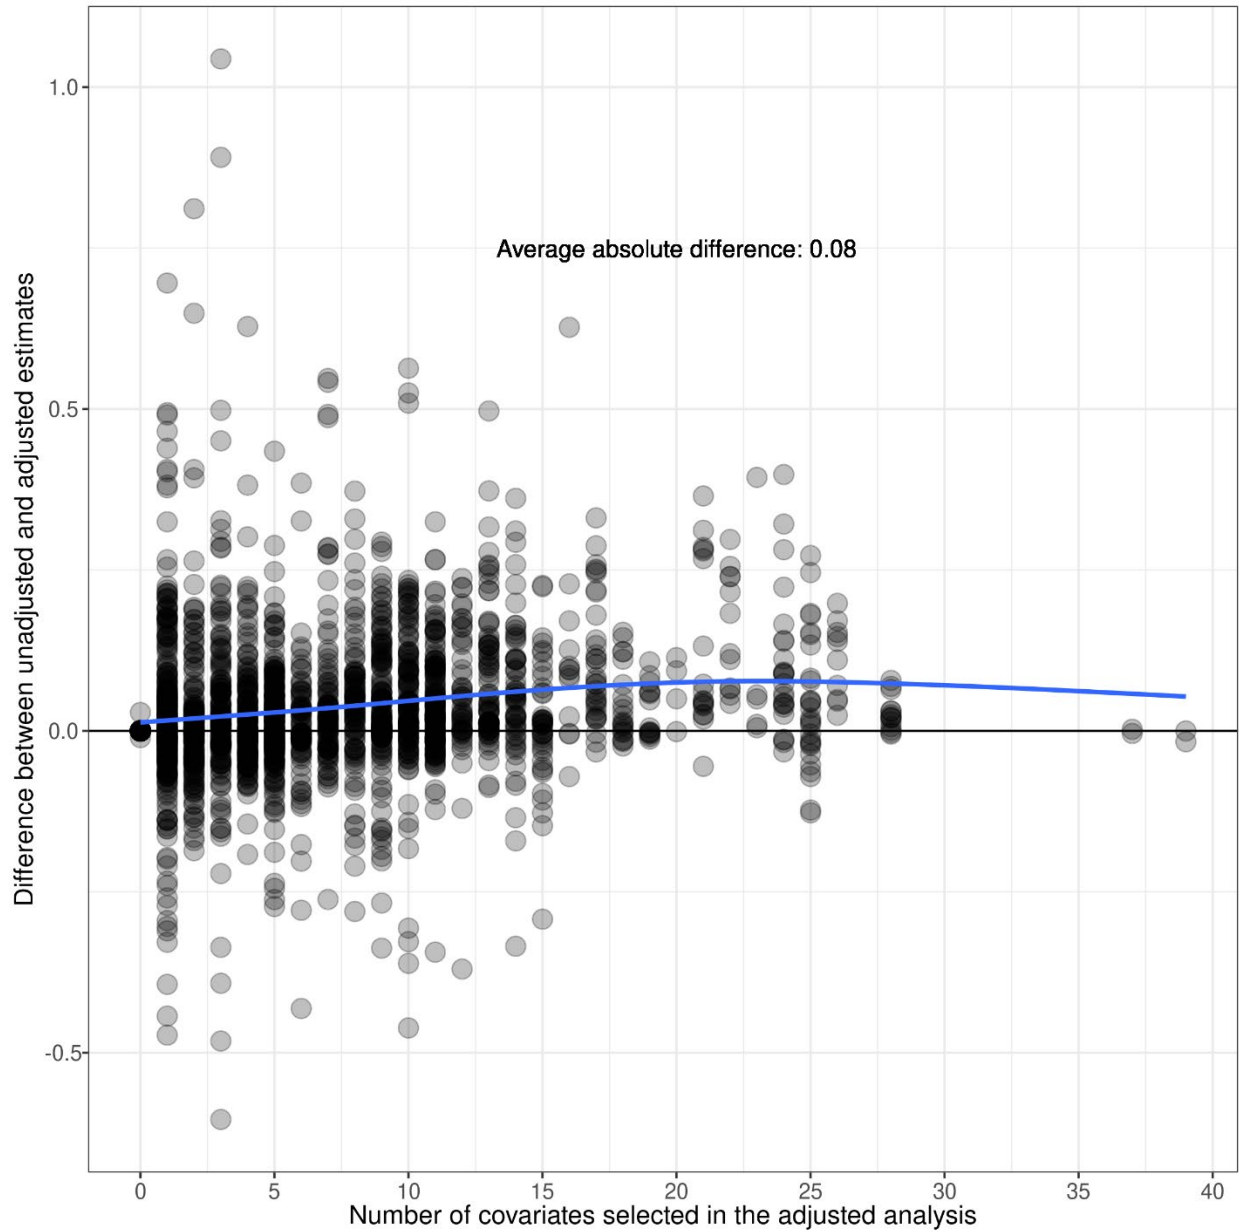

734

735 **Extended Data Figure 12 | Difference between adjusted and unadjusted Z-score**  
736 **effects by number of selected adjustment variables.**

737 Points mark the difference in estimates unadjusted and adjusted estimates of the difference in average Z-  
738 scores between exposed and unexposed children across 33 cohorts, 30 exposures and length-for-age  
739 and weight-for-length Z-score outcomes included in the analysis. Different cohorts measured different  
740 sets of exposures, and a different number of adjustment covariates were chosen for each cohort-specific  
741 estimate based on outcome sparsity, so cohort-specific estimates adjust for different covariates and  
742 numbers of covariates. The plot shows no systematic bias between unadjusted and adjusted estimates  
743 based on number of covariates chosen. The blue line shows the average difference between adjusted  
744 estimates from unadjusted estimates, fitted using a cubic spline.

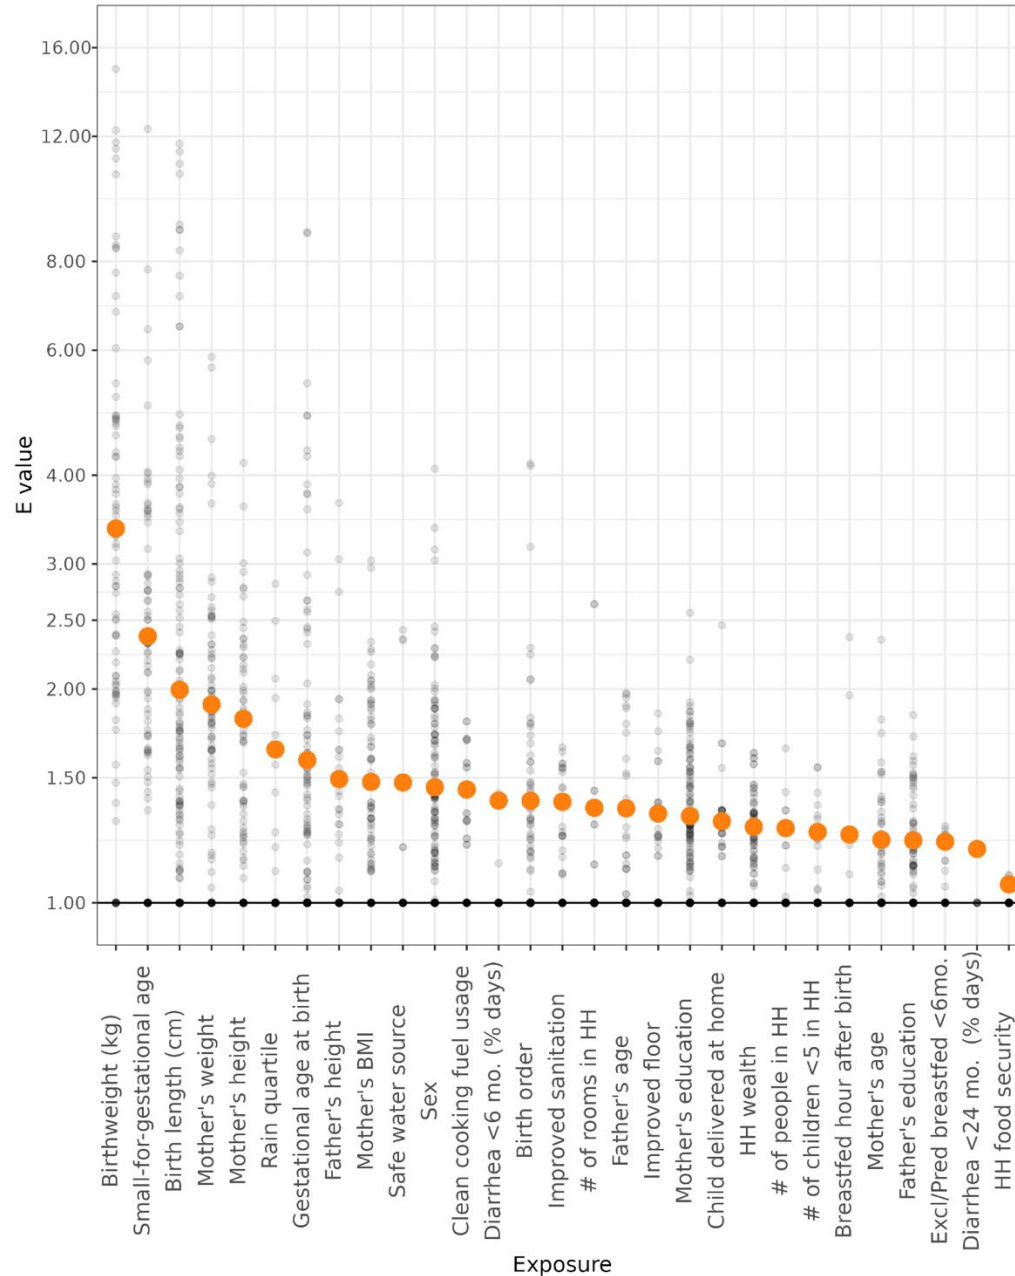

745

746 **Extended Data Figure 13 | Assessing sensitivity of estimates to unmeasured**  
747 **confounding using E-values**

748 An E-value is the minimum strength of association in terms of relative risk that an unmeasured  
749 confounder would need to have with both the exposure and the outcome to explain away an estimated  
750 exposure–outcome association.<sup>1</sup> Orange points mark the E-values for the pooled estimates of relative risk  
751 for each exposure. Grey points are cohort-specific E-values for each exposure–outcome relationship.  
752 Non-significant pooled estimates have points plotted at 1.0. Orange points are median E-values among  
753 statistically significant estimates for each exposure. As an example, an unmeasured confounder would on  
754 average need to almost double the risk of both the exposure and the outcome to explain away observed  
755 significant associations for the birth length exposure.

756

757

758 **Extended data table 1**

| Region, Study ID          | Country      | Study Years    | Design             | Children Enrolled* | Anthropometry measurement ages (months)                  | Total measurements* | Primary References                                      |
|---------------------------|--------------|----------------|--------------------|--------------------|----------------------------------------------------------|---------------------|---------------------------------------------------------|
| South Asia                |              |                |                    |                    |                                                          |                     |                                                         |
| Biomarkers for EE         | Pakistan     | 2013-2015      | Prospective cohort | 380                | Birth, 1, 2, ..., 18                                     | 8918                | Iqbal et al 2018 Nature Scientific Reports <sup>2</sup> |
| Resp. Pathogens           | Pakistan     | 2011 - 2014    | Prospective cohort | 284                | Birth, 1, 2, ..., 17                                     | 3177                | Ali et al 2016 Journal of Medical Virology <sup>3</sup> |
| Growth Monitoring Study   | Nepal        | 2012 - Ongoing | Prospective cohort | 698                | Birth, 1, 2, ..., 24                                     | 13487               | Not yet published                                       |
| MAL-ED                    | Nepal        | 2010 - 2014    | Prospective cohort | 240                | Birth, 1, 2, ..., 24                                     | 5936                | Shrestha et al 2014 Clin Infect Dis <sup>4</sup>        |
| CMC Birth Cohort, Vellore | India        | 2002 - 2006    | Prospective cohort | 373                | Birth, 0.5, 1, 1.5, ..., 24                              | 9131                | Gladstone et al. 2011 NEJM <sup>5</sup>                 |
| MAL-ED                    | India        | 2010 - 2012    | Prospective cohort | 251                | Birth, 1, 2, ..., 24                                     | 5947                | John et al 2014 Clin Infect Dis <sup>6</sup>            |
| Vellore Crypto Study      | India        | 2008 - 2011    | Prospective cohort | 410                | Birth, 1, 2, ..., 24                                     | 9825                | Kattula et al. 2014 BMJ Open <sup>7</sup>               |
| CMIN                      | Bangladesh   | 1993 - 1996    | Prospective Cohort | 280                | Birth, 3, 6, ..., 24                                     | 5399                | Pathela et al 2007 Acta Paediatrica <sup>8</sup>        |
| TDC                       | India        | 2008-2011      | Quasi-experimental | 160                | Birth, 1, 2, ..., 24                                     | 3723                | Sarkar et al. 2013 BMC Public Health                    |
| MAL-ED                    | Bangladesh   | 2010 - 2014    | Prospective cohort | 265                | Birth, 1, 2, ..., 24                                     | 5816                | Ahmed et al 2014 Clin Infect Dis <sup>9</sup>           |
| PROVIDE RCT               | Bangladesh   | 2011 - 2014    | Individual RCT     | 700                | Birth, 6, 10, 12, 14, 17, 18, 24, 39, 40, 52, 53 (weeks) | 12165               | Colgate et al 2016 Clin Infect Dis <sup>10</sup>        |
| Food Suppl RCT            | India        | 1995 - 1996    | Individual RCT     | 418                | Baseline, 6, 9, 12                                       | 2242                | Bhandari et al 2001 J Nutri <sup>11</sup>               |
| Optimal Infant Feeding    | India        | 1999 - 2001    | Cluster RCT        | 1535               | Birth, 3, 6, ..., 18                                     | 9539                | Bhandari et al 2004 J Nutri <sup>12</sup>               |
| NIH Birth Cohort          | Bangladesh   | 2008 - 2009    | Prospective Cohort | 629                | Birth, 3, 6, ..., 12                                     | 6216                | Korpe et al. 2016 PLOS NTD <sup>13</sup>                |
| JiVitA-4 Trial            | Bangladesh   | 2012 - 2014    | Cluster RCT        | 5444               | 6, 9, 12, 14, 18                                         | 36167               | Christian et al 2015 IJE <sup>14</sup>                  |
| JiVitA-3 Trial            | Bangladesh   | 2008 - 2012    | Cluster RCT        | 27342              | Birth, 1, 3, 6, 12, 24                                   | 109535              | West et al JAMA 2014 <sup>15</sup>                      |
| NIH Cryptosporidium Study | Bangladesh   | 2014 - 2017    | Prospective cohort | 758                | Birth, 3, 6, ..., 24                                     | 9774                | Steiner et al 2018 Clin Infect Dis <sup>16</sup>        |
| Africa                    |              |                |                    |                    |                                                          |                     |                                                         |
| MAL-ED                    | Tanzania     | 2009 - 2014    | Prospective cohort | 262                | Birth, 1, 2, ..., 24                                     | 5857                | Mduma et al 2014 Clin Infect Dis <sup>17</sup>          |
| Tanzania Child 2          | Tanzania     | 2007 - 2011    | Individual RCT     | 2400               | 1, 2, ..., 20                                            | 32198               | Locks et al Am J Clin Nutr 2016 <sup>18</sup>           |
| MAL-ED                    | South Africa | 2009 - 2014    | Prospective cohort | 314                | Birth, 1, 2, ..., 24                                     | 6478                | Bessong et al 2014 Clin Infect Dis <sup>19</sup>        |
| MRC Keneba                | Gambia       | 1987 - 1997    | Cohort             | 2931               | Birth, 1, 2, ..., 24                                     | 40952               | Schoenbuchner et al. 2019, AJCN <sup>20</sup>           |

It is made available under a [CC-BY 4.0 International license](https://creativecommons.org/licenses/by/4.0/).

|                                                                                                                                                                             |               |             |                    |       |                                     |        |                                                   |
|-----------------------------------------------------------------------------------------------------------------------------------------------------------------------------|---------------|-------------|--------------------|-------|-------------------------------------|--------|---------------------------------------------------|
| ZVITAMBO Trial                                                                                                                                                              | Zimbabwe      | 1997 - 2001 | Individual RCT     | 14104 | Birth, 6 wks, 3, 6, 9, 12           | 73651  | Malaba et al 2005 Am J Clin Nutr <sup>21</sup>    |
| Lungwena Child Nutrition RCT                                                                                                                                                | Malawi        | 2011 - 2014 | Individual RCT     | 840   | Birth, 1-6 wk, 6, 12 18             | 4346   | Mangani et al. 2015, Mat Child Nutr <sup>22</sup> |
| iLiNS-Zinc Study                                                                                                                                                            | Burkina Faso  | 2010 - 2012 | Cluster RCT        | 3266  | 9, 12, 15, 18                       | 10552  | Hess et al 2015 Plos One <sup>23</sup>            |
| CMIN GB94                                                                                                                                                                   | Guinea Bissau | 1994 - 1997 | Prospective Cohort | 870   | Enrollment and every 3 months after | 6459   | Valentiner-Branth 2001 Am J Clin Nutr             |
| Latin America                                                                                                                                                               |               |             |                    |       |                                     |        |                                                   |
| MAL-ED                                                                                                                                                                      | Peru          | 2009 - 2014 | Prospective cohort | 303   | Birth, 1, 2, ..., 24                | 6442   | Yori et al 2014 Clin Infect Dis <sup>24</sup>     |
| CONTENT                                                                                                                                                                     | Peru          | 2007 - 2011 | Prospective cohort | 215   | Birth, 1, 2, ..., 24                | 8339   | Jaganath et al 2014 Helicobacter <sup>25</sup>    |
| Bovine Serum RCT                                                                                                                                                            | Guatemala     | 1997 - 1998 | Individual RCT     | 315   | Baseline, 1, 2, ..., 8              | 2551   | Begin et al. 2008, EJCN <sup>26</sup>             |
| MAL-ED                                                                                                                                                                      | Brazil        | 2010 - 2014 | Prospective cohort | 233   | Birth, 1, 2, ..., 24                | 5092   | Lima et al 2014 Clin Infect Dis <sup>27</sup>     |
| CMIN Brazil89                                                                                                                                                               | Brazil        | 1989-2000   | Prospective Cohort | 119   | Birth, 1, 2, ..., 24                | 889    | Moore et al. 2001 Int J Epidemiol.                |
| CMIN Peru95                                                                                                                                                                 | Peru          | 1995 - 1998 | Prospective Cohort | 224   | Birth, 1, 2, ..., 24                | 3979   | Checkley et al. 2003 Am J Epidemiol.              |
| CMIN Peru89                                                                                                                                                                 | Peru          | 1989 - 1991 | Prospective Cohort | 210   | Birth, 1, 2, ..., 24                | 2742   | Checkley et al. 1998 Am J Epidemiol.              |
| Europe                                                                                                                                                                      |               |             |                    |       |                                     |        |                                                   |
| PROBIT Study                                                                                                                                                                | Belarus       | 1996 - 1997 | Cluster RCT        | 16898 | 1, 2, 3, 6, 9, 12                   | 124509 | Kramer et al 2001 JAMA <sup>28</sup>              |
| Mortality analysis only                                                                                                                                                     |               |             |                    |       |                                     |        |                                                   |
| Burkina Faso Zinc trial                                                                                                                                                     | Burkina Faso  | 2010-2011   | Cluster RCT        | 7167  | 6, 10, 14, 17, 22                   | 15155  | Becquey et al 2016 J Nutr <sup>29</sup>           |
| Vitamin A Trial                                                                                                                                                             | India         | 1995-1996   | Cluster RCT        | 3983  | 1, 3, 6, 9, 12                      | 32570  | WHO CHD Vitamin A Group 1998 Lancet <sup>30</sup> |
| iLiNS-DOSE                                                                                                                                                                  | Malawi        | 2009-2011   | Individual RCT     | 1932  | 6, 9, 12, 18                        | 13801  | Maleta et al. 2015 J Nutr <sup>22</sup>           |
| iLiNS-DYAD-M                                                                                                                                                                | Malawi        | 2011-2015   | Individual RCT     | 1235  | 1, 6, 12, 18                        | 9207   | Ashorn et al 2015 J. Nutr <sup>22</sup>           |
| *Children enrolled is for children with measurements under 2 years of age. Total measurements are number of measurements of anthropometry on children under 2 years of age. |               |             |                    |       |                                     |        |                                                   |

759 **Extended data table 2**

760 All exposures included in the analysis, as well as the categories the exposures were classified into across all cohorts, categorization rules, the  
 761 total number of children, the percentage of children in each category, select evidence from prior literature, and comparisons to our results. We  
 762 selected the exposures of interest based on variables present in multiple cohorts that met our inclusion criteria, were found to be important  
 763 determinants of stunting and wasting in prior literature, and could be harmonized across cohorts for pooled analyses. Where possible, we cite  
 764 findings from recent randomized controlled trials and systematic reviews. All referenced results from this manuscript are available here:  
 765 <https://child-growth.github.io/causes/RR-forest.html>. \*Bracketed codes at the end of each cell in the “Comparison to results in this analysis”  
 766 indicate limitations to comparisons with previous evidence due to differences in: P=population, CA=child age, AV=adjustment variables used in the  
 767 analysis, MOA=measure of association, SD=study design, EC=exposure classification.

768

| Exposure variable | N children under 24 months with both measured exposure and length | Exposure levels [N (%)]                                                       | Categorization rules | Previous published evidence                                                                                                                                                                                                                                                                                                                                                                                                                                                                                                                                                            | Comparison to results in this analysis                                                                                                                                                                                                                                                                                                          |
|-------------------|-------------------------------------------------------------------|-------------------------------------------------------------------------------|----------------------|----------------------------------------------------------------------------------------------------------------------------------------------------------------------------------------------------------------------------------------------------------------------------------------------------------------------------------------------------------------------------------------------------------------------------------------------------------------------------------------------------------------------------------------------------------------------------------------|-------------------------------------------------------------------------------------------------------------------------------------------------------------------------------------------------------------------------------------------------------------------------------------------------------------------------------------------------|
| Sex               | 78751                                                             | Female: 38444 (48.8%)<br>Male: 40307 (51.2%)                                  |                      | In a meta-analysis of cohorts and surveys, boys had higher odds of being wasted and stunted than girls (pooled wasting OR 1.2, 95% CI 1.13 to 1.40, pooled stunting OR 1.29 95% CI 1.22 to 1.37). There was some evidence that the sex difference is smaller in South Asia. <sup>31</sup>                                                                                                                                                                                                                                                                                              | Supports our finding of increased risk of stunting (prevalence ratio (PR) of 1.15 [95% CI: 1.06, 1.26] at 24 months for wasting, 1.26 [95% CI: 1.13, 1.39] at 24 months for stunting), and slightly smaller prevalence ratios in South Asia (stunting PR: 1.06 [95% CI: 1.02, 1.09, wasting PR: 1.22 [95% CI: 1.10, 1.35]). [Different P, CA]*  |
| Birth weight (kg) | 65041                                                             | Normal or high birth weight: 50940 (78.3%)<br>Low birth weight: 14101 (21.7%) |                      | A meta-analysis of 19 birth cohorts found a stunting PR of 2.92 (95% CI: 2.56, 3.33) associated with low birth weight (LBW) in children 1-5 years old, and a wasting PR of 2.68 (95% CI: 2.23, 3.21). <sup>32</sup> A meta-analysis of sub-Saharan African DHS datasets found LBW was strongly associated with stunting (adjusted OR: 1.68 [95% CI: 1.58–1.78]) and wasting (aOR: 1.35 [95% CI: 1.20–1.38]) in children under 5. A systematic review of growth failure in sub-Saharan Africa consistently found LBW as a top risk factor for later wasting and stunting. <sup>33</sup> | Birthweight was also one of the strongest risk factors (PR of stunting at 24 months: 1.49 [95% CI: 1.37, 1.62], PR of wasting at 24 months: 1.87 [95% CI: 1.70, 2.06]), though with lower magnitude point estimates compared the cohort meta-analysis and more aligned with the DHS analysis of older children. [Different P, CA, AV, MOA, SD]* |
| Birth length (cm) | 61703                                                             | >=50 cm: 23313 (37.5%)<br>[48-50] cm: 14136 (39.6%)<br><48 cm: 24426 (22.9%)  |                      | Birth length was the strongest predictor of stunting at in 2-year old children in the four country-specific cohorts included in the Women First trial (adjusted PR of 1.62 [95% CI: 1.39, 1.88] comparing children stunted at birth to children with a LAZ > -1 at birth). <sup>34</sup>                                                                                                                                                                                                                                                                                               | There was a very similar risk of low birth length. Children born with a length <48 cm (close to the stunting cutoff at birth) had 1.52 times the risk of stunting compared to children born with a length >50 cm (95% CI: 1.66, 2.58).                                                                                                          |

|                           |       |                                                                                      |                                                                                                                                                                                                              |                                                                                                                                                                                                                                                                                                                                                                                                                                                                                                                                                                                                                                                                                                                                                                                          |                                                                                                                                                                                                                                                                                                                                                                                                                                                                                                                   |
|---------------------------|-------|--------------------------------------------------------------------------------------|--------------------------------------------------------------------------------------------------------------------------------------------------------------------------------------------------------------|------------------------------------------------------------------------------------------------------------------------------------------------------------------------------------------------------------------------------------------------------------------------------------------------------------------------------------------------------------------------------------------------------------------------------------------------------------------------------------------------------------------------------------------------------------------------------------------------------------------------------------------------------------------------------------------------------------------------------------------------------------------------------------------|-------------------------------------------------------------------------------------------------------------------------------------------------------------------------------------------------------------------------------------------------------------------------------------------------------------------------------------------------------------------------------------------------------------------------------------------------------------------------------------------------------------------|
|                           |       |                                                                                      |                                                                                                                                                                                                              |                                                                                                                                                                                                                                                                                                                                                                                                                                                                                                                                                                                                                                                                                                                                                                                          | Wasting risk was also increased (PR: 1.52 [95% CI: 1.21, 1.92]). [Different P, CA, AV]*                                                                                                                                                                                                                                                                                                                                                                                                                           |
| Gestational age at birth  | 45269 | Full or late term: 23313 (51.5%)<br>Preterm: 6328 (14%)<br>Early term: 15628 (34.5%) | <260 days is preterm, [260-274] days is early term, >= 274 is full term                                                                                                                                      | In a meta-analysis of 19 birth cohorts, infants born preterm had 1.69 times the odds (95% CI: 1.48, 1.93) of stunting and 1.55 times the odds (95% CI: 1.21, 1.97) of wasting from 1 to 5 years of age. <sup>32</sup>                                                                                                                                                                                                                                                                                                                                                                                                                                                                                                                                                                    | The estimates are higher than in our study (PR of stunting at 24 months: 1.21 [95% CI: 1.13, 1.29], PR of wasting at 24 months: 1.13 [95% CI: 1.01, 1.26]), but support our finding of a significant increase in growth failure risk with preterm birth. [Different P, CA, AV, MOA]*                                                                                                                                                                                                                              |
| Small for gestational age | 39934 | Not small for gestational age 27161 (68%)<br>Small for gestational age 12773 (32%)   | Children were classified as small-for gestational age if they had birthweights below the 10th percentile based on INTERGROWTH gestational age adjusted weight-for-age Z-scores (< -1.282 WAZ). <sup>35</sup> | In a meta-analysis of 19 birth cohorts, infants born small for gestational age (SGA) had 2.32 times the odds (95% CI: 2.12, 2.54) of stunting from 1 to 5 years of age compared to children not SGA, and they had 2.36 times the odds (95% CI: 2.14, 2.60) of wasting. <sup>32</sup>                                                                                                                                                                                                                                                                                                                                                                                                                                                                                                     | The estimates are higher than in our study (PR of stunting at 24 months: 1.33 [95% CI: 1.22, 1.46], PR of wasting at 24 months: 1.83 [95% CI: 1.51, 2.21]), but support our finding of a significant increase in growth failure risk with SGA [Different P, CA, AV, MOA]*                                                                                                                                                                                                                                         |
| Birth order               | 46099 | 1: 17294 (37.5%)<br>2: 14107 (30.6%)<br>3+: 14698 (31.9%)                            |                                                                                                                                                                                                              | A systematic review found that later birth order was consistently associated with a higher risk of stunting and wasting in the 16% of studies that identified birth order as an important risk factor for malnutrition. <sup>36</sup> In an analysis of 35 country-specific DHS analyses, birth order had an inconsistent relationship with stunting and wasting, with a decreased risk in second and third-born children compared to firstborn, but an increased risk in fourth-born or later. <sup>37</sup> In the four country-specific cohorts included in the Women First trial, second-born or later children had an increased Z-score trajectory from birth to 24 months, but a lower LAZ and higher risk of stunting at 24 months (PR: 1.12 [95% CI: 1.02, 1.24]). <sup>34</sup> | Our results were somewhat incongruous with the previous research. Birth order had a complex association with child growth failure, with a decreased risk of wasting and stunting in thirdborn or later children before 6 months of age (compared to firstborn children), and an increased risk after 6 months (Figure 4c). Stunting risk was similarly increased at 24 months (PR: 1.11 [95% CI: 1.01, 1.22]), but Z-score trajectories were also lower, in contrast to the Women First trial. [Different P, AV]* |
| Delivery location         | 8487  | 0: 2793 (32.9%)<br>1: 5694 (67.1%)                                                   |                                                                                                                                                                                                              | In an urban matched case-control study of infants 0-3 months old in Nigeria, the adjusted odds ratio associated with home delivery was 2.33 for severe stunting (95% CI: 1.50-3.60) and 2.90 for severe wasting (95% CI: 1.32-6.37) compared to delivery in public hospitals. <sup>38</sup> In a cohort in Malawi, home delivery was associated with 1.7 times the odds of severe stunting at 1 year of age after confounder adjustment (95% CI: 1.1 to 2.7). <sup>39</sup>                                                                                                                                                                                                                                                                                                              | Home delivery had a significant but smaller association with any wasting (PR: 1.34 [95% CI: 1.03, 1.74]) or stunting (PR: 1.14 [95% CI: 1.06, 1.23]) at 6 months, but a null association with severe stunting. Home delivery was still associated with stunting (PR: 1.14 [95% CI: 1.04, 1.24]) but not wasting or severe stunting at 24 months. Severe wasting was too rare among the cohorts that measured home delivery to estimate the association at either age. [Different P, CA, AV, MOA, SD, EC]*         |
| Maternal height           | 60742 | >=150 cm: 44831 (73.8%)<br><150 cm: 15911                                            | Cutoff chosen because a 150cm tall, 19-year-old woman has a HAZ of -2                                                                                                                                        | An analysis of 109 DHS surveys found a 1-cm increase in maternal height was associated with a decreased risk of child stunting (OR, 0.968; 95% CI,                                                                                                                                                                                                                                                                                                                                                                                                                                                                                                                                                                                                                                       | Maternal height was also consistently and strongly associated with all measures of child growth failure at the different examined ages.                                                                                                                                                                                                                                                                                                                                                                           |



|                                |       |                                                                     |                                                                                                                                                                                                   |                                                                                                                                                                                                                                                                                                                                                                                                                                                                                                                                                                                                                                                                                                                                                                                                                                |                                                                                                                                                                                                                                                                                                                                                                                                                                                                                                                                                                                                                                                                                                                                                                                                             |
|--------------------------------|-------|---------------------------------------------------------------------|---------------------------------------------------------------------------------------------------------------------------------------------------------------------------------------------------|--------------------------------------------------------------------------------------------------------------------------------------------------------------------------------------------------------------------------------------------------------------------------------------------------------------------------------------------------------------------------------------------------------------------------------------------------------------------------------------------------------------------------------------------------------------------------------------------------------------------------------------------------------------------------------------------------------------------------------------------------------------------------------------------------------------------------------|-------------------------------------------------------------------------------------------------------------------------------------------------------------------------------------------------------------------------------------------------------------------------------------------------------------------------------------------------------------------------------------------------------------------------------------------------------------------------------------------------------------------------------------------------------------------------------------------------------------------------------------------------------------------------------------------------------------------------------------------------------------------------------------------------------------|
|                                |       | (26.2%)                                                             |                                                                                                                                                                                                   | 0.967-0.968), and wasting (OR, 0.994; 95% CI, 0.993-0.995). <sup>40</sup> An analysis of 35 DHS surveys also found consistent, significant, exposure-response curve between categories of maternal height and risk of stunting and wasting. <sup>37</sup>                                                                                                                                                                                                                                                                                                                                                                                                                                                                                                                                                                      | For example, the risk of stunting at 24 months was 1.63 times higher (95% CI: 1.46, 1.82) for children of stunted mothers compared to non-stunted mothers, and the risk of wasting was 1.18 time higher (95% CI: 1.09, 1.29).<br>[Different P, CA, AV, MOA, SD, EC]*                                                                                                                                                                                                                                                                                                                                                                                                                                                                                                                                        |
| Maternal body mass index (BMI) | 57627 | >=20 BMI: 34952 (60.7%)<br>< 20 BMI: 22675 (39.3%)                  | Calculated from maternal height and weight. Excludes mothers whose only weight measurement was taken during pregnancy. A 45 kg, 150 cm woman (the cutoffs for height and weight) has a BMI of 20. | A pooled analysis of 35 DHS cohorts found a significant increase in child stunting (OR: 1.64, p-value: <0.001) and wasting (OR: 1.64, p-value: <0.001) when mothers had BMI < 18.5 during pregnancy compared to mothers with a BMI > 25. <sup>37</sup>                                                                                                                                                                                                                                                                                                                                                                                                                                                                                                                                                                         | Maternal BMI was also consistently and strongly associated with all measures of child growth failure at the different examined ages. The risk of stunting at 24 months was 1.21 times higher (95% CI: 1.06, 1.38) for children of lower weight mothers and the risk of wasting was 1.81 time higher (95% CI: 1.33, 2.47).<br>[Different P, CA, AV, MOA, SD]*                                                                                                                                                                                                                                                                                                                                                                                                                                                |
| Maternal weight                | 59256 | >=45 kg: 40338 (68.1%)<br><45 kg: 18918 (31.9%)                     | Cutoff chosen because a 45kg heavy, 19-year-old woman has a WAZ of -2                                                                                                                             | No studied examining maternal weight in kg were found; the studies identified all used BMI to examine associations between maternal weight and child growth failure.                                                                                                                                                                                                                                                                                                                                                                                                                                                                                                                                                                                                                                                           |                                                                                                                                                                                                                                                                                                                                                                                                                                                                                                                                                                                                                                                                                                                                                                                                             |
| Mother's age                   | 70548 | [20-30]: 41707 (59.1%)<br><20: 17826 (25.3%)<br>>=30: 11015 (15.6%) |                                                                                                                                                                                                   | A systematic review found that children born to women under the age of 20 had a consistently greater risk of stunted children compared to women aged ≥ 20 years (OR from 1.37 to 7.56). <sup>41</sup>                                                                                                                                                                                                                                                                                                                                                                                                                                                                                                                                                                                                                          | We observed a similar increased risk of stunted children (at 24 months) born to teenage mothers (PR: 1.07 [95% CI: 1.02, 1.12]) but a less consistent association with wasting (PR: 1.07 [95% CI: 0.83, 1.37]). However, the pooled risk in this study was much smaller, possibly because the children were younger than average, or a more complete control of confounding by SES and maternal size.<br>[Different P, CA, AV, MOA, SD, EC]*                                                                                                                                                                                                                                                                                                                                                                |
| Maternal education             | 69971 | High: 23013 (32.9%)<br>Low: 23702 (33.9%)<br>Medium: 23256 (33.2%)  | Classified by splitting distribution of numbers of years of educations into thirds within each cohort, or grouping ordered categories of educational attainment into three levels.                | Multiple systematic reviews have found maternal education to be the most frequently reported significant factor associated with child malnutrition (reported in >50% of studies). <sup>36,42</sup> A meta-analysis of 182 DHS datasets found a strong association between maternal education and wasting and stunting. <sup>43</sup> At a country level, a systematic review found improvements in maternal educational attainment predicted 17% of the total HAZ change in Pakistan (49), between 11% and 14% in Nepal (33, 49–51), 10% in Guinea (29) and India (49), and 7% in Cambodia (55). <sup>44</sup> However, a SRMA found that, while several included studies found inconsistent associations between maternal education and wasting and stunting, the pooled estimates were insignificant for both. <sup>45</sup> | After tertiling years of education within studies, low and medium maternal education was significantly associated with prevalence of stunting at 24 months compared to children of high-education mothers (low education PR: 1.21 [95% CI: 1.13, 1.30], medium education PR: 1.10 [95% CI: 1.04, 1.17]). Education was not associated with wasting at 24 months, but it was associated with the cumulative incidence of wasting between birth and 2 years (low education CIR: 1.09 [95% CI: 1.05, 1.13], medium education CIR: 1.08 [95% CI: 1.04, 1.11]) as well as with the cumulative incidence of stunting. The inconsistent associations in this and prior studies may be due to inconsistent coding of maternal education and differences in educational systems. [Different P, CA, AV, MOA, SD, EC]* |

|                                    |       |                                                                                                      |                                                                                                                                                                                    |                                                                                                                                                                                                                                                                                                                                                                                                                                                                                                                                                                       |                                                                                                                                                                                                                                                                                                                                                                                                                                                                                                                      |
|------------------------------------|-------|------------------------------------------------------------------------------------------------------|------------------------------------------------------------------------------------------------------------------------------------------------------------------------------------|-----------------------------------------------------------------------------------------------------------------------------------------------------------------------------------------------------------------------------------------------------------------------------------------------------------------------------------------------------------------------------------------------------------------------------------------------------------------------------------------------------------------------------------------------------------------------|----------------------------------------------------------------------------------------------------------------------------------------------------------------------------------------------------------------------------------------------------------------------------------------------------------------------------------------------------------------------------------------------------------------------------------------------------------------------------------------------------------------------|
| Paternal height                    | 15772 | >=162 cm: 15079 (95.6%)<br><162 cm: 693 (4.4%)                                                       | Cutoff chosen because a 162cm tall, 19 year old man has a HAZ of -2                                                                                                                | A meta-analysis of 14 DHS studies found a significant increase in the risk of child stunting (in children under 5 years) comparing the shortest to tallest quintiles of fathers (adjusted RR = 1.56 [95% CI: 1.47, 1.65]), though the association was stronger when using mother's heights. In a sensitivity analysis as part of a meta-analysis of 35 DHS studies, low paternal height (<155cm) was significantly associated with stunting (1.9 [95% CI: 1.7, 2.2]) and wasting (1.7 [95% CI: 1.4, 2.0]), but also less strongly than maternal height. <sup>37</sup> | We utilized a different cutoff than either study, comparing stunted fathers to non-stunted fathers, and found a significant, but smaller, association with the cumulative incidence of stunting in younger children than the DHS analysis (CIR: 1.12 [95% CI: 1.02, 1.23]). This was also smaller than the association between maternal stunting and child stunting, but the association with wasting was significant and of similar magnitude (CIR: 1.16 [95% CI: 1.04, 1.30]). [Different P, CA, AV, MOA, SD, EC]* |
| Paternal age                       | 18976 | >=35: 2289 (12.1%)<br><30: 13002 (68.5%)<br>[30-35]: 3685 (19.4%)                                    |                                                                                                                                                                                    | No meta-analyses examining this risk factor were found, and in general there were limited studies analyzing the association between father's age and child growth failure. A repeated cross-sectional survey in Indonesia found no association with father's age and stunting, wasting, or underweight. <sup>46</sup>                                                                                                                                                                                                                                                 | Children of fathers older than 35 had higher WLZ's at 24 months than children of fathers younger than 30 after adjusting for potential confounders, but there were no other growth associations. [Different P, CA, AV, MOA, SD, EC]*                                                                                                                                                                                                                                                                                 |
| Paternal education                 | 65728 | High: 12684 (19.3%)<br>Low: 23089 (35.1%)<br>Medium: 29955 (45.6%)                                   | Classified by splitting distribution of numbers of years of educations into thirds within each cohort, or grouping ordered categories of educational attainment into three levels. | A meta-analysis of 182 DHS datasets found a similarly strong association between paternal and maternal education and child growth failure after confounder adjustment. <sup>43</sup>                                                                                                                                                                                                                                                                                                                                                                                  | We also found a similar association between paternal and maternal education and growth failure, with a null association with wasting and 24 months and significantly higher risk of stunting in children of low and medium education mothers compared to high education mothers. (Low education PR: 1.30 [95% CI: 1.08, 1.57], medium education PR: 1.26 [95% CI: 1.07, 1.47]). [Different P, CA, AV, MOA, SD, EC]*                                                                                                  |
| Caregiver partner status           | 38222 | 0: 36393 (95.2%)<br>1: 1829 (4.8%)                                                                   | Caregivers were classified as single if they were unmarried, widowed, or with a long-term long-distance partner.                                                                   | A meta-analysis found that single mothers had a higher risk of infant low birth weight (OR 1.54 [95%CI 1.39–1.72]). <sup>47</sup>                                                                                                                                                                                                                                                                                                                                                                                                                                     | Caregiver status was not associated with child stunting at 24 months (wasting was too rare to examine) or wasting at 6 months, but children of unpartnered mothers were significantly more likely to be stunted at 6 months (PR: 1.25 [95% CI: 1.08, 1.44]) and the cumulative incidence of wasting before 2 years of age (CIR: 1.12 [95% CI: 1.02, 1.24]). [Different P, CA, AV, MOA, SD, EC]*                                                                                                                      |
| Asset based household wealth index | 36754 | WealthQ4: 9618 (26.2%)<br>WealthQ3: 9165 (24.9%)<br>WealthQ2: 9012 (24.5%)<br>WealthQ1: 8959 (24.4%) | First principal component of a principal components analysis of all recorded assets owned by the household (examples: cell phone, bicycle, car).                                   | A meta-analysis of 35 DHS surveys from sub-Saharan Africa examined the associations between household wealth indices computed by principal components analyses and stunting in children under 5 years. It found an OR of 1.34 (95% CI: 1.27, 1.42) when comparing the lowest versus highest wealth quintile. <sup>48</sup> Related, a meta-analysis of cash transfer programs found significant effects on height-for-age z-scores (of 0.03 5% CI 0.00 to 0.06) and a 2.1% decrease in stunting (95% CI -3.5% to -0.7%). <sup>49</sup>                                | Asset based household wealth was significantly associated with stunting at 24 months (PR: 1.26 [95% CI: 1.17, 1.36]) but not wasting (PR: 1.12 [95% CI: 0.98, 1.27]). [Different P, CA, AV, MOA, SD, EC]*                                                                                                                                                                                                                                                                                                            |

|                         |       |                                                                                                 |                                                                                                                                                                                                                                                                                                                                                                                                                                                                                                                                                                                                                                                                                                                                                                                                                      |                                                                                                                                                                                                                                                                                                                                                                                                                                                                                                                                                                                          |                                                                                                                                                                                                                                                                                                                                                                    |
|-------------------------|-------|-------------------------------------------------------------------------------------------------|----------------------------------------------------------------------------------------------------------------------------------------------------------------------------------------------------------------------------------------------------------------------------------------------------------------------------------------------------------------------------------------------------------------------------------------------------------------------------------------------------------------------------------------------------------------------------------------------------------------------------------------------------------------------------------------------------------------------------------------------------------------------------------------------------------------------|------------------------------------------------------------------------------------------------------------------------------------------------------------------------------------------------------------------------------------------------------------------------------------------------------------------------------------------------------------------------------------------------------------------------------------------------------------------------------------------------------------------------------------------------------------------------------------------|--------------------------------------------------------------------------------------------------------------------------------------------------------------------------------------------------------------------------------------------------------------------------------------------------------------------------------------------------------------------|
| Household food security | 24461 | Food Secure: 12534 (51.2%)<br>Mildly Food Insecure: 7921 (32.4%)<br>Food Insecure: 4006 (16.4%) | Combination of three food security scales:<br><ol style="list-style-type: none"> <li>1. The Household Hunger Scale (HHS)<sup>50</sup></li> <li>2. Food Access Survey Tool (FAST)<sup>51</sup></li> <li>3. USAID Household Food Insecurity Access Scale (HFIAS), with middle 2 categories classified as mildly food insecure.<sup>52</sup></li> </ol> <p>And one survey question from the NIH Bangladesh birth cohort and NIH Bangladesh Cryptosporidium cohort:<br/>         "In terms of household food availability, how do you classify your household?"</p> <ol style="list-style-type: none"> <li>1. Deficit in whole year</li> <li>2. Sometimes deficit</li> <li>3. Neither deficit nor surplus</li> <li>4. Surplus</li> </ol> <p>Where the middle two categories were classified as mildly food insecure.</p> | A systematic review and meta-analysis of 21 studies found that food insecurity increased the risk of stunting (odds ratio [OR] = 1.17; 95% CI: 1.09–1.25) but not of wasting (OR = 1.04; 95% CI: 0.96–1.12). The associations were stronger in children older than 5 years old than those younger than 5 years, and in LMIC's. <sup>53</sup> Related to household food security, a recent meta-analysis of randomized controlled trials of small-quantity lipid-based nutrient supplements (SQ-LNSs) found a significant reduction in both stunting and wasting. <sup>54</sup>           | Higher food insecurity was consistently but not significantly associated with wasting and stunting (PR of stunting at 24 months between food insecure and secure: 1.17 [95% CI: 0.96, 1.44] and PR of wasting 1.07 [95% CI: 0.95, 1.20]), with similar associations with prevalence at 6 months and the cumulative incidence). [Different P, CA, AV, MOA, SD, EC]* |
| Improved flooring       | 35354 | 1: 4693 (13.3%)<br>0: 30661 (86.7%)                                                             |                                                                                                                                                                                                                                                                                                                                                                                                                                                                                                                                                                                                                                                                                                                                                                                                                      | No meta-analyses examining this risk factor were found. Overall, there are limited studies specifically intervening to improve flooring or on the associations between improved flooring and growth, but an Ethiopian DHS analysis found an increased risk of stunting among children in households with natural/earth/sand floors versus cement/wood floors (OR: 1.33 [95% CI: 1.08, 1.64]). <sup>55</sup> Additional research in two cohorts found improved flooring reduces soil-transmitted helminth and Giardia infections, which are associated with reduced growth. <sup>56</sup> | We also found an increased risk of stunting in younger children than the DHS analysis (PR at 24 months: 1.17 [95% CI: 1.08, 1.28]), and a reduction in LAZ and WLZ, but no effect on wasting. [Different P, CA, AV, MOA, SD, EC]*                                                                                                                                  |
| Improved sanitation     | 35086 | 1: 24119 (68.7%)<br>0: 10967 (31.3%)                                                            | WHO Joint Monitoring program definition                                                                                                                                                                                                                                                                                                                                                                                                                                                                                                                                                                                                                                                                                                                                                                              | Two large trials of individual and combined WASH interventions (WASH Benefits Kenya and Bangladesh) found no effect of improved sanitation interventions on HAZ, WHZ, stunting, or wasting. <sup>57,58</sup> In contrast, a pooled meta-analysis of 35 DHS studies found an                                                                                                                                                                                                                                                                                                              | Similar to the DHS analysis but in contrast to evidence from recent randomized trials, unimproved sanitation was associated with increased prevalence of stunting (PR: 1.09, [95% CI: 1.04, 1.14]) and wasting (PR: 1.22,                                                                                                                                          |

|                                        |       |                                                                                 |                                         |                                                                                                                                                                                                                                                                                                                                                                                                 |                                                                                                                                                                                                                                                                                                                                                                                                                                                          |
|----------------------------------------|-------|---------------------------------------------------------------------------------|-----------------------------------------|-------------------------------------------------------------------------------------------------------------------------------------------------------------------------------------------------------------------------------------------------------------------------------------------------------------------------------------------------------------------------------------------------|----------------------------------------------------------------------------------------------------------------------------------------------------------------------------------------------------------------------------------------------------------------------------------------------------------------------------------------------------------------------------------------------------------------------------------------------------------|
|                                        |       |                                                                                 |                                         | effect on stunting (PR: 1.10, [95% CI: 1.06, 1.13]) and wasting PR: 1.07, [95% CI: 1.02, 1.12]), potentially indicating residual confounding in observational analyses of WASH condition. <sup>37</sup>                                                                                                                                                                                         | [95% CI: 1.08, 1.38]) at 24 months. This potentially indicated either residual confounding from wealth and health seeking behavior of those with improved sanitation, or increased density of improved sanitation around household in observational studies compared to intervention studies. [Different P, CA, AV, MOA, SD, EC]*                                                                                                                        |
| Improved water source                  | 35284 | 1: 33777 (95.7%)<br>0: 1507 (4.3%)                                              | WHO Joint Monitoring program definition | Two large trials of individual and combined WASH interventions (WASH Benefits Kenya and Bangladesh) found no effect of improved water interventions on HAZ, WHZ, stunting, or wasting. <sup>57,58</sup> A pooled meta-analysis of 35 DHS studies also found no effect on stunting, but did find an association with wasting (PR: 1.07, [95% CI: 1.02, 1.12]). <sup>37</sup>                     | Improved water source was not associated with wasting or stunting, aligned with the randomized trial findings. [Different P, CA, AV, MOA, SD, EC]*                                                                                                                                                                                                                                                                                                       |
| Clean cooking fuel usage               | 1401  | 1: 407 (29.1%)<br>0: 994 (70.9%)                                                |                                         | A meta-analysis of clean cookstove interventions found a reduction in stunting in children ages 0-59 months (Odds Ratio: 0.79 [95% CI: 0.70–0.89]). <sup>59</sup> A different meta-analysis found a similar reduction in low birthweight (Odds Ratio: 0.73 [95% CI: 0.61–0.87]), but did not examine growth in older children. <sup>60</sup>                                                    | Like the meta-analysis, clean cooking fuel use also associated with reduced stunting (PR at 24 months: 0.81, [95% CI: 0.68, 0.97]), and was also associated with reduced wasting at 24 months (PR: 0.59, [95% CI: 0.43, 0.83]). Clean cooking fuel use was also associated with the cumulative incidence of stunting in the first 6 months, but the studies with cooking fuel data didn't measure children at birth. [Different P, CA, AV, MOA, SD, EC]* |
| Number of children <5 in the household | 31610 | 1: 18963 (60%)<br>2+: 12647 (40%)                                               |                                         | No meta-analyses or systematic reviews examining this risk factor were found. A case-control study from Malaysia found an increased risk of any form of growth failure in children under 5 years old with more children in the household (PR comparing households 4 or more children to three or less: 5.86 [95% CI: 1.96-17.55]). <sup>61</sup>                                                | Other children in the household were associated with increased stunting (PR: 1.19 [9% CI: 1.04, 1.35]) but not wasting at 24 months. [Different P, CA, AV, SD]*                                                                                                                                                                                                                                                                                          |
| Number of individuals in the household | 1805  | 3 or less: 363 (20.1%)<br>4-5: 745 (41.3%)<br>6-7: 452 (25%)<br>8+: 245 (13.6%) |                                         | No meta-analyses or systematic reviews examining this risk factor were found. A cross-sectional study from Madagascar found an increased risk of stunting and wasting in children 5-14 years with more people in the household (stunting PR comparing households with 5 or more people children to four or less: 1.17 [95% CI: 1.03-1.33], wasting PR: 1.24 [95% CI: 1.04–1.48]). <sup>62</sup> | There was a small but non-significant increase in risk of stunting and wasting with more individuals in the household. [Different P, CA, AV, SD]*                                                                                                                                                                                                                                                                                                        |
| Number of rooms in household           | 35929 | 4+: 2492 (6.9%)<br>1: 20210 (56.2%)<br>2: 9484 (26.4%)<br>3: 3743 (10.4%)       |                                         | No meta-analyses examining this risk factor were found, and DHS surveys generally measure the number rooms used for sleeping, not the total number of rooms.                                                                                                                                                                                                                                    | The number of rooms in the household was not associated with increased risk of stunting or wasting.                                                                                                                                                                                                                                                                                                                                                      |

|                                                                      |       |                                                                                                                        |                                                                                                                                                                                                                                                                                                                                                                                                                                                                                                                                                                                                                                                                                                                                                                                                              |                                                                                                                                                                                                                                                                                                                                                                                                                                                                                                                                                                                                                                                                        |                                                                                                                                                                                                                                                                                                  |
|----------------------------------------------------------------------|-------|------------------------------------------------------------------------------------------------------------------------|--------------------------------------------------------------------------------------------------------------------------------------------------------------------------------------------------------------------------------------------------------------------------------------------------------------------------------------------------------------------------------------------------------------------------------------------------------------------------------------------------------------------------------------------------------------------------------------------------------------------------------------------------------------------------------------------------------------------------------------------------------------------------------------------------------------|------------------------------------------------------------------------------------------------------------------------------------------------------------------------------------------------------------------------------------------------------------------------------------------------------------------------------------------------------------------------------------------------------------------------------------------------------------------------------------------------------------------------------------------------------------------------------------------------------------------------------------------------------------------------|--------------------------------------------------------------------------------------------------------------------------------------------------------------------------------------------------------------------------------------------------------------------------------------------------|
| Rain season                                                          | 9769  | Opposite max rain: 2469 (25.3%)<br>Pre max rain: 2248 (23.0%)<br>Max rain: 2718 (27.8%)<br>Post max rain: 2334 (23.9%) | Rainfall data was extracted from Terraclimate, a dataset that combines readings from WorldClim data, CRU Ts4.0, and the Japanese 55-year Reanalysis Project. <sup>63</sup> For each study region, we averaged all readings within a 50 km radius from the study coordinates. If GPS locations were not in the data for a cohort, we used the approximate location of the cohort based on the published descriptions of the cohort. The three-month period opposite the three months of maximum rainfall was used as the reference level (e.g., if June-August was the period of maximum rainfall, the reference level is child mean WLZ during January-March). Due to the time-varying nature of this exposure, N's are reported for children with length measures at 24 months and measures of rain season. | In a SRMA, drought conditions were significantly associated with wasting (OR: 1.46 [95% CI: 1.05, 2.04]). <sup>64</sup> A meta-analysis of 55 DHS datasets found that both abnormally high and low rainfall was associated with reduced HAZ and WHZ. <sup>65</sup> A systematic review found extreme rainfall was associated with an increased risk of wasting, but found crop growing season rainfall was protective for wasting. <sup>66</sup> A different systematic review found consistent associations between rainfall and HAZ, but the magnitude and direction of effect varied by study and the timing of the rainfall that the study examined. <sup>67</sup> | WHZ was significantly lower and wasting significantly higher during the three months of highest rainfall and the three months after the highest rainfall period, but there was no significant association between rain and stunting of HAZ. [Different P, CA, AV, MOA, SD, EC]*                  |
| Breastfed in the hour after birth                                    | 49168 | 1: 11609 (23.6%)<br>0: 37559 (76.4%)                                                                                   |                                                                                                                                                                                                                                                                                                                                                                                                                                                                                                                                                                                                                                                                                                                                                                                                              | Early initiation of breastfeeding was significantly associated with stunting in most cross-sectional studies evaluated in a systematic review, but most of these estimates were not adjusted for confounding. <sup>68</sup> A cohort study found no association with stunting and wasting, <sup>69</sup> while a pooled analysis of 35 DHS surveys found an increase in stunting odds (OR: 1.037, P-value <0.001) but a decreased risk of wasting (OR: 0.937, P-value <0.001). <sup>37</sup>                                                                                                                                                                           | Early breastfeeding was not significantly associated with reduced stunting or wasting, in contrast to prior cross-sectional studies but aligned with prior evidence from analyses of cohorts. [Different P, CA, AV, MOA, SD]*                                                                    |
| Exclusive or predominant breastfeeding in the first 6 months of life | 26173 | 1: 18285 (69.9%)<br>0: 7888 (30.1%)                                                                                    | Exclusive breastfeeding: mother reported only feeding child breastmilk on all dietary surveys<br>Predominant breastfeeding: mother reported only feeding child breastmilk, other liquids, or medicines on all dietary surveys                                                                                                                                                                                                                                                                                                                                                                                                                                                                                                                                                                                | A SRMA of studies of exclusive breastfeeding found a reduction in stunting (OR = 0.73 [95% CI = 0.55, 0.95]), <sup>70</sup> but a SRMA of breastfeeding promotion interventions found no impact on LAZ and an unexpected reduction in WLZ. <sup>71</sup>                                                                                                                                                                                                                                                                                                                                                                                                               | Non-exclusive breastfeeding was associated with a smaller but still significant increase in the prevalence of stunting at 6 months (PR: 1.11 [95% CI: 1.03, 1.21]) and 24 months (PR: 1.05 [95% CI: 1.00, 1.10]), but there was no association with wasting. [Different P, CA, AV, MOA, SD, EC]* |
| Cumulative percent of days with diarrhea under 6 months              | 3735  | [0%, 2%]: 2245 (60.1%)<br>>2%: 1490 (39.9%)                                                                            | Percent days defined as proportion of disease surveillance days a child had diarrhea during the time interval. Diarrhea defined by 3 or more                                                                                                                                                                                                                                                                                                                                                                                                                                                                                                                                                                                                                                                                 | A pooled analysis of nine cohorts and trials found that the adjusted odds of stunting at 24 months increased by 1.16 for every 5% absolute increase in longitudinal prevalence of diarrheal disease prior to 24 months (95% CI 1.07–1.25). <sup>72</sup> A separate analysis                                                                                                                                                                                                                                                                                                                                                                                           | We found a similar magnitude in the reduction of LAZ at 24 months (-0.14 z [95% CI: -0.21 - 0.06]) associated with increased diarrhea, but no association with WLZ, stunting, or wasting. [Different P, AV, EC]*                                                                                 |

|                                                          |       |                                             |                                                                                                                                                 |                                                                                                                                                                                                                                                                                                                                                                                                                                                   |                                                                                                                                                                                   |
|----------------------------------------------------------|-------|---------------------------------------------|-------------------------------------------------------------------------------------------------------------------------------------------------|---------------------------------------------------------------------------------------------------------------------------------------------------------------------------------------------------------------------------------------------------------------------------------------------------------------------------------------------------------------------------------------------------------------------------------------------------|-----------------------------------------------------------------------------------------------------------------------------------------------------------------------------------|
|                                                          |       |                                             | loose stools, or bloody stool, in a 24 hour period. Only included studies with at least 100 disease surveillance measurements during age range. | of 7 cohorts found WHZ, but not LAZ was reduced 30 days after diarrheal disease, while a higher cumulative burden of diarrhea reduced linear growth at 24 months (-0.1 LAZ per 10 days of diarrhea). <sup>73</sup>                                                                                                                                                                                                                                |                                                                                                                                                                                   |
| Cumulative percent of days with diarrhea under 24 months | 12639 | [0%, 2%]: 6133 (48.5%)<br>>2%: 6506 (51.5%) | Same as above.                                                                                                                                  | In the second study detailed above, it was estimated that a child with the average diarrhea burden during the first 6 months of life who then went on to have no diarrhea did not have a significantly lower LAZ at 24 months than a child with no diarrhea. <sup>73</sup> Because there was an overall effect of diarrhea on LAZ at 24 months, this indicated the potential for catch-up growth, or a lower impact of infant diarrhea on growth. | We also found no association between diarrhea before 6 months and growth at 24 months, and there was also no association with growth outcomes at 6 months. [Different P, AV, EC]* |

769 **Extended data table 3**

770 Under 1-year country-specific mortality rate is from UNICEF (<https://data.unicef.org/country>), and is  
771 higher than the cohort-specific under 2-year mortality rate for all cohorts used in the mortality analysis.

| Study           | Country      | Number of deaths under 2 | Under 2 mortality rate in cohort (%) | Infant (Under 1) mortality rate in cohort (%) | Infant (Under 1) mortality country rate (UNICEF) |
|-----------------|--------------|--------------------------|--------------------------------------|-----------------------------------------------|--------------------------------------------------|
| Burkina Faso Zn | Burkina Faso | 39                       | 0.54                                 | 0.42                                          | 5.4                                              |
| iLiNS-DOSE      | Malawi       | 53                       | 2.74                                 | 1.92                                          | 3.1                                              |
| iLiNS-DYAD-M    | Malawi       | 54                       | 4.37                                 | 3.48                                          | 3.1                                              |
| JiVitA-3        | Bangladesh   | 934                      | 3.41                                 | 2.85                                          | 2.6                                              |
| JiVitA-4        | Bangladesh   | 49                       | 0.9                                  | 0.39                                          | 2.6                                              |
| Keneba          | The Gambia   | 65                       | 2.22                                 | 1.52                                          | 3.6                                              |
| VITAMIN-A       | India        | 108                      | 2.70                                 | 2.7                                           | 2.8                                              |
| ZVITAMBO        | Zimbabwe     | 1113                     | 7.89                                 | 6.57                                          | 3.8                                              |

772



## 773 **Supplementary References**

- 774 1. VanderWeele, T. J. & Ding, P. Sensitivity Analysis in Observational Research: Introducing the E-  
775 Value. *Ann. Intern. Med.* **167**, 268 (2017).
- 776 2. Iqbal, N. T. *et al.* Promising Biomarkers of Environmental Enteric Dysfunction: A Prospective Cohort  
777 study in Pakistani Children. *Sci. Rep.* **8**, 2966 (2018).
- 778 3. Ali, A. *et al.* Respiratory viruses associated with severe pneumonia in children under 2 years old in a  
779 rural community in Pakistan. *J. Med. Virol.* **88**, 1882–1890 (2016).
- 780 4. Shrestha, P. S. *et al.* Bhaktapur, Nepal: The MAL-ED Birth Cohort Study in Nepal. *Clin. Infect. Dis.*  
781 **59**, S300–S303 (2014).
- 782 5. Gladstone, B. P. *et al.* Protective Effect of Natural Rotavirus Infection in an Indian Birth Cohort. *N.*  
783 *Engl. J. Med.* **365**, 337–346 (2011).
- 784 6. John, S. M. *et al.* Establishment of the MAL-ED Birth Cohort Study Site in Vellore, Southern India.  
785 *Clin. Infect. Dis.* **59**, S295–S299 (2014).
- 786 7. Kattula, D. *et al.* The first 1000 days of life: prenatal and postnatal risk factors for morbidity and  
787 growth in a birth cohort in southern India. *BMJ Open* **4**, e005404 (2014).
- 788 8. Pathela, P. *et al.* Diarrheal illness in a cohort of children 0-2 years of age in rural Bangladesh: I.  
789 Incidence and risk factors: Risk factors for diarrhea in Bangladeshi children. *Acta Paediatr.* **95**, 430–  
790 437 (2007).
- 791 9. Ahmed, T. *et al.* The MAL-ED Cohort Study in Mirpur, Bangladesh. *Clin. Infect. Dis.* **59**, S280–S286  
792 (2014).
- 793 10. Colgate, E. R. *et al.* Delayed Dosing of Oral Rotavirus Vaccine Demonstrates Decreased Risk of  
794 Rotavirus Gastroenteritis Associated With Serum Zinc: A Randomized Controlled Trial. *Clin. Infect.*  
795 *Dis.* **63**, 634–641 (2016).
- 796 11. Bhandari, N. *et al.* Food Supplementation with Encouragement to Feed It to Infants from 4 to 12  
797 Months of Age Has a Small Impact on Weight Gain. *J. Nutr.* **131**, 1946–1951 (2001).
- 798 12. Bhandari, N. *et al.* An Educational Intervention to Promote Appropriate Complementary Feeding  
799 Practices and Physical Growth in Infants and Young Children in Rural Haryana, India. *J. Nutr.* **134**,  
800 2342–2348 (2004).
- 801 13. Korpe, P. S. *et al.* Natural History of Cryptosporidiosis in a Longitudinal Study of Slum-Dwelling  
802 Bangladeshi Children: Association with Severe Malnutrition. *PLoS Negl. Trop. Dis.* **10**, (2016).
- 803 14. Christian, P. *et al.* Effect of fortified complementary food supplementation on child growth in rural  
804 Bangladesh: a cluster-randomized trial. *Int. J. Epidemiol.* **44**, 1862–1876 (2015).
- 805 15. West, K. P. *et al.* Effect of Maternal Multiple Micronutrient vs Iron–Folic Acid Supplementation on  
806 Infant Mortality and Adverse Birth Outcomes in Rural Bangladesh: The JiVitA-3 Randomized Trial.  
807 *JAMA* **312**, 2649–2658 (2014).
- 808 16. Steiner, K. L. *et al.* Species of Cryptosporidia Causing Subclinical Infection Associated With Growth  
809 Faltering in Rural and Urban Bangladesh: A Birth Cohort Study. *Clin. Infect. Dis. Off. Publ. Infect. Dis.*  
810 *Soc. Am.* **67**, 1347–1355 (2018).
- 811 17. Mduma, E. R. *et al.* The Etiology, Risk Factors, and Interactions of Enteric Infections and Malnutrition  
812 and the Consequences for Child Health and Development Study (MAL-ED): Description of the  
813 Tanzanian Site. *Clin. Infect. Dis.* **59**, S325–S330 (2014).
- 814 18. Locks, L. M. *et al.* Effect of zinc and multivitamin supplementation on the growth of Tanzanian  
815 children aged 6–84 wk: a randomized, placebo-controlled, double-blind trial. *Am. J. Clin. Nutr.* **103**,  
816 910–918 (2016).
- 817 19. Bessong, P. O., Nyathi, E., Mahopo, T. C. & Netshandama, V. Development of the Dzimauli  
818 Community in Vhembe District, Limpopo Province of South Africa, for the MAL-ED Cohort Study.  
819 *Clin. Infect. Dis.* **59**, S317–S324 (2014).
- 820 20. Schoenbuchner, S. M. *et al.* The relationship between wasting and stunting: a retrospective cohort  
821 analysis of longitudinal data in Gambian children from 1976 to 2016. *Am. J. Clin. Nutr.*  
822 doi:10.1093/ajcn/nqy326.

- 823 21. Malaba, L. C. *et al.* Effect of postpartum maternal or neonatal vitamin A supplementation on infant  
824 mortality among infants born to HIV-negative mothers in Zimbabwe. *Am. J. Clin. Nutr.* **81**, 454–460  
825 (2005).
- 826 22. Mangani, C. *et al.* Effect of complementary feeding with lipid-based nutrient supplements and corn-  
827 soy blend on the incidence of stunting and linear growth among 6- to 18-month-old infants and  
828 children in rural Malawi. *Matern. Child. Nutr.* **11**, 132–143 (2015).
- 829 23. Hess, S. Y. *et al.* Small-Quantity Lipid-Based Nutrient Supplements, Regardless of Their Zinc  
830 Content, Increase Growth and Reduce the Prevalence of Stunting and Wasting in Young Burkinabe  
831 Children: A Cluster-Randomized Trial. *PLOS ONE* **10**, e0122242 (2015).
- 832 24. Yori, P. P. *et al.* Santa Clara de Nanay: The MAL-ED Cohort in Peru. *Clin. Infect. Dis.* **59**, S310–S316  
833 (2014).
- 834 25. Jaganath, D. *et al.* First Detected *Helicobacter pylori* Infection in Infancy Modifies the Association  
835 Between Diarrheal Disease and Childhood Growth in Peru. *Helicobacter* **19**, 272–279 (2014).
- 836 26. Bégin, F., Santizo, M.-C., Peerson, J. M., Torún, B. & Brown, K. H. Effects of bovine serum  
837 concentrate, with or without supplemental micronutrients, on the growth, morbidity, and micronutrient  
838 status of young children in a low-income, peri-urban Guatemalan community. *Eur. J. Clin. Nutr.* **62**,  
839 39–50 (2008).
- 840 27. Lima, A. A. M. *et al.* Geography, Population, Demography, Socioeconomic, Anthropometry, and  
841 Environmental Status in the MAL-ED Cohort and Case-Control Study Sites in Fortaleza, Ceará,  
842 Brazil. *Clin. Infect. Dis.* **59**, S287–S294 (2014).
- 843 28. Kramer, M. S. *et al.* Promotion of Breastfeeding Intervention Trial (PROBIT): A Randomized Trial in  
844 the Republic of Belarus. *JAMA* **285**, 413–420 (2001).
- 845 29. Becquey, E. *et al.* Comparison of Preventive and Therapeutic Zinc Supplementation in Young  
846 Children in Burkina Faso: A Cluster-Randomized, Community-Based Trial. *J. Nutr.* **146**, 2058–2066  
847 (2016).
- 848 30. Randomised trial to assess benefits and safety of vitamin A supplementation linked to immunisation  
849 in early infancy. *The Lancet* **352**, 1257–1263 (1998).
- 850 31. Thurstans, S. *et al.* Boys are more likely to be undernourished than girls: a systematic review and  
851 meta-analysis of sex differences in undernutrition. *BMJ Glob. Health* **5**, e004030 (2020).
- 852 32. Christian, P. *et al.* Risk of childhood undernutrition related to small-for-gestational age and preterm  
853 birth in low- and middle-income countries. *Int J Epidemiol* **42**, 1340–1355 (2013).
- 854 33. Akombi, B. J. *et al.* Stunting, Wasting and Underweight in Sub-Saharan Africa: A Systematic Review.  
855 *Int. J. Environ. Res. Public Health* **14**, (2017).
- 856 34. Krebs, N. F. *et al.* Birth length is the strongest predictor of linear growth status and stunting in the first  
857 2 years of life after a preconception maternal nutrition intervention: the children of the Women First  
858 trial. *Am. J. Clin. Nutr.* **116**, 86–96 (2022).
- 859 35. Villar, J. *et al.* International standards for newborn weight, length, and head circumference by  
860 gestational age and sex: the Newborn Cross-Sectional Study of the INTERGROWTH-21st Project.  
861 *Lancet Lond. Engl.* **384**, 857–868 (2014).
- 862 36. Katoch, O. R. Determinants of malnutrition among children: A systematic review. *Nutrition* **96**, 111565  
863 (2021).
- 864 37. Li, Z., Kim, R., Vollmer, S. & Subramanian, S. V. Factors Associated With Child Stunting, Wasting,  
865 and Underweight in 35 Low- and Middle-Income Countries. *JAMA Netw. Open* **3**, e203386 (2020).
- 866 38. Olusanya, B. O. & Renner, J. K. Is home birth a marker for severe malnutrition in early infancy in  
867 urban communities of low-income countries? *Matern. Child. Nutr.* **8**, 492–502 (2012).
- 868 39. Espo, M. *et al.* Determinants of linear growth and predictors of severe stunting during infancy in rural  
869 Malawi. *Acta Paediatr.* **91**, 1364–1370 (2002).
- 870 40. Özaltın, E., Hill, K. & Subramanian, S. V. Association of Maternal Stature With Offspring Mortality,  
871 Underweight, and Stunting in Low- to Middle-Income Countries. *JAMA* **303**, 1507–1516 (2010).
- 872 41. Astuti, F. D., Azka, A. & Rokhmayanti, R. Maternal age correlation of stunting in children: Systematics

- 873 review. *J. Matern. Child Health* **7**, 479–448 (2022).
- 874 42. Verma, P. & Prasad, J. B. Stunting, wasting and underweight as indicators of under-nutrition in under  
875 five children from developing Countries: A systematic review. *Diabetes Metab. Syndr. Clin. Res. Rev.*  
876 **15**, 102243 (2021).
- 877 43. Vollmer, S., Bommer, C., Krishna, A., Harttgen, K. & Subramanian, S. The association of parental  
878 education with childhood undernutrition in low- and middle-income countries: comparing the role of  
879 paternal and maternal education. *Int. J. Epidemiol.* **46**, 312–323 (2017).
- 880 44. Vaivada, T. *et al.* Stunting in childhood: an overview of global burden, trends, determinants, and  
881 drivers of decline. *Am. J. Clin. Nutr.* **112**, 777S–791S (2020).
- 882 45. Mensch, B. S., Chuang, E. K., Melnikas, A. J. & Psaki, S. R. Evidence for causal links between  
883 education and maternal and child health: systematic review. *Trop. Med. Int. Health* **24**, 504–522  
884 (2019).
- 885 46. Rachmi, C. N., Agho, K. E., Li, M. & Baur, L. A. Stunting, Underweight and Overweight in Children  
886 Aged 2.0–4.9 Years in Indonesia: Prevalence Trends and Associated Risk Factors. *PLoS ONE* **11**,  
887 e0154756 (2016).
- 888 47. Shah, P. S., Zao, J. & Ali, S. Maternal Marital Status and Birth Outcomes: A Systematic Review and  
889 Meta-Analyses. *Matern. Child Health J.* **15**, 1097–1109 (2011).
- 890 48. Abate, K., Assen, W., Ali, R., Kalkidan, H. & Waseyehon, A. wasihun hassen. Varying Relationship of  
891 Wealth of Households and Stunting of Under Five Children in Sub-Saharan Africa: A Meta-Analysis  
892 of Demographic Health Surveys. 616–623 (2019).
- 893 49. Manley, J. *et al.* Cash transfers and child nutritional outcomes: a systematic review and meta-  
894 analysis. *BMJ Glob. Health* **5**, e003621 (2020).
- 895 50. Ballard, T., Coates, J., Swindale, A. & Deitchler, M. Household Hunger Scale: Indicator Definition and  
896 Measurement Guide. 23.
- 897 51. Coates, J. Measuring Food Insecurity: Going Beyond Indicators of Income and Anthropometry. 106  
898 (1825).
- 899 52. Coates, J., Swindale, A. & Bilinsky, P. Household Food Insecurity Access Scale (HFIAS) for  
900 Measurement of Food Access: Indicator Guide: Version 3: (576842013-001). (2007)  
901 doi:10.1037/e576842013-001.
- 902 53. Moradi, S. *et al.* Food insecurity and the risk of undernutrition complications among children and  
903 adolescents: A systematic review and meta-analysis. *Nutrition* **62**, 52–60 (2019).
- 904 54. Dewey, K. G. *et al.* Preventive small-quantity lipid-based nutrient supplements reduce severe wasting  
905 and severe stunting among young children: an individual participant data meta-analysis of  
906 randomized controlled trials. *Am. J. Clin. Nutr.* nqac232 (2022) doi:10.1093/ajcn/nqac232.
- 907 55. Ayelign, A. & Zerfu, T. Household, dietary and healthcare factors predicting childhood stunting in  
908 Ethiopia. *Heliyon* **7**, e06733 (2021).
- 909 56. Benjamin-Chung, J. *et al.* Household finished flooring and soil-transmitted helminth and Giardia  
910 infections among children in rural Bangladesh and Kenya: a prospective cohort study. *Lancet Glob.*  
911 *Health* **9**, e301–e308 (2021).
- 912 57. Luby, S. P. *et al.* Effects of water quality, sanitation, handwashing, and nutritional interventions on  
913 diarrhoea and child growth in rural Bangladesh: a cluster randomised controlled trial. *Lancet Glob.*  
914 *Health* **6**, e302–e315 (2018).
- 915 58. Null, C. *et al.* Effects of water quality, sanitation, handwashing, and nutritional interventions on  
916 diarrhoea and child growth in rural Kenya: a cluster-randomised controlled trial. *Lancet Glob. Health*  
917 **6**, e316–e329 (2018).
- 918 59. Bruce, N. G. *et al.* Control of household air pollution for child survival: estimates for intervention  
919 impacts. *BMC Public Health* **13**, S8 (2013).
- 920 60. Woolley, K. E. *et al.* Effectiveness of interventions to reduce household air pollution from solid  
921 biomass fuels and improve maternal and child health outcomes in low- and middle-income countries:  
922 A systematic review and meta-analysis. *Indoor Air* **32**, e12958 (2022).

- 923 61. Wong, H. J., Moy, F. M. & Nair, S. Risk factors of malnutrition among preschool children in  
924 Terengganu, Malaysia: a case control study. *BMC Public Health* **14**, 785 (2014).
- 925 62. Aiga, H. *et al.* Risk factors for malnutrition among school-aged children: a cross-sectional study in  
926 rural Madagascar. *BMC Public Health* **19**, 773 (2019).
- 927 63. Abatzoglou, J. T., Dobrowski, S. Z., Parks, S. A. & Hegewisch, K. C. TerraClimate, a high-resolution  
928 global dataset of monthly climate and climatic water balance from 1958–2015. *Sci. Data* **5**, 170191  
929 (2018).
- 930 64. Lieber, M., Chin-Hong, P., Kelly, K., Dandu, M. & Weiser, S. D. A systematic review and meta-  
931 analysis assessing the impact of droughts, flooding, and climate variability on malnutrition. *Glob.*  
932 *Public Health* **17**, 68–82 (2022).
- 933 65. Le, K. & Nguyen, M. In-utero Exposure to Rainfall Variability and Early Childhood Health. *World Dev.*  
934 **144**, 105485 (2021).
- 935 66. Brown, M. E. *et al.* Empirical studies of factors associated with child malnutrition: highlighting the  
936 evidence about climate and conflict shocks. *Food Secur.* **12**, 1241–1252 (2020).
- 937 67. Phalkey, R. K., Aranda-Jan, C., Marx, S., Höfle, B. & Sauerborn, R. Systematic review of current  
938 efforts to quantify the impacts of climate change on undernutrition. *Proc. Natl. Acad. Sci.* **112**,  
939 E4522–E4529 (2015).
- 940 68. Susianto, S. C., Suprobo, N. R. & Maharani, M. Early Breastfeeding Initiation Effect in Stunting: A  
941 Systematic Review. *Asian J. Health Res.* **1**, 1–6 (2022).
- 942 69. Smith, E. R. *et al.* Delayed Breastfeeding Initiation Is Associated with Infant Morbidity. *J. Pediatr.* **191**,  
943 57-62.e2 (2017).
- 944 70. Mardani, R. A. D., Wu, W.-R., Nhi, V. T. & Huang, H.-C. Association of breastfeeding with  
945 undernutrition among children under 5 years of age in developing countries: A systematic review and  
946 meta-analysis. *J. Nurs. Scholarsh.*
- 947 71. Giugliani, E. R. J., Horta, B. L., Mola, C. L. de, Lisboa, B. O. & Victora, C. G. Effect of breastfeeding  
948 promotion interventions on child growth: a systematic review and meta-analysis. *Acta Paediatr.* **104**,  
949 20–29 (2015).
- 950 72. Checkley, W. *et al.* Multi-country analysis of the effects of diarrhoea on childhood stunting. *Int. J.*  
951 *Epidemiol.* **37**, 816–830 (2008).
- 952 73. Richard, S. A. *et al.* Diarrhea in Early Childhood: Short-term Association With Weight and Long-term  
953 Association With Length. *Am. J. Epidemiol.* **178**, 1129–1138 (2013).

954

## 955 **Materials and Methods**

### 956 **1. Study designs and inclusion criteria**

957 We included all longitudinal observational studies and randomized trials available through the *ki* project  
958 on April 1, 2018 that met five inclusion criteria: 1) conducted in low- or middle-income countries; 2)  
959 enrolled children between birth and age 24 months and measured their length and weight repeatedly  
960 over time; 3) did not restrict enrollment to acutely ill children; 4) enrolled children with a median year of  
961 birth after 1990; 5) collected anthropometry measurements at least quarterly. We included all children  
962 under 24 months of age, assuming months were 30.4167 days, and we considered a child's first measure  
963 recorded by age 7 days as their anthropometry at birth. Four additional studies with high-quality  
964 mortality information that measured children at least every 6 months were included in the mortality  
965 analyses (The Burkina Faso Zinc trial, The Vitamin-A trial in India, and the iLINS-DOSE and iLINS-DYAD-M  
966 trials in Malawi).

967

### 968 **2. Statistical analysis**



969 Analyses were conducted in R version 4.0.5. All pooled, regional, and cohort-specific results, results for  
970 secondary outcomes, and sensitivity analyses are available online at ([https://child-  
971 growth.github.io/causes](https://child-growth.github.io/causes)).

972

### 973 **3. Outcome definitions**

974 We calculated length-for-age Z-scores (LAZ), weight-for-age Z-scores (WAZ), and weight-for-length Z-  
975 scores (WLZ) using WHO 2006 growth standards.<sup>1</sup> We used the medians of triplicate measurements of  
976 heights and weights of children from pre-2006 cohorts to re-calculate Z-scores to the 2006 standard. We  
977 dropped 1,190 (0.2%) unrealistic measurements of LAZ (>+6 or <-6 Z), 1,330 (0.2%) measurements of  
978 WAZ (> 5 or <-6 Z), and 1,670 (0.3%) measurements of WLZ (>+5 or -5 Z), consistent with WHO  
979 recommendations.<sup>2</sup> See Benjamin-Chung (2020) for more details on cohort inclusion and assessment of  
980 anthropometry measurement quality.<sup>3</sup> We also calculated the difference in linear and ponderal growth  
981 velocities over three-month periods. We calculated the change in LAZ, WAZ, length in centimeters, and  
982 weight in kilograms within 3-month age intervals, including measurements within a two-week window  
983 around each age in months to account for variation in the age at each length measurement.

984 We defined stunting as LAZ < -2, severe stunting as LAZ < -3, underweight as WAZ < -2, severe  
985 underweight as WAZ < -3, wasting as WLZ < -2, severe wasting as WLZ < -3, concurrent stunting and  
986 wasting as LAZ < -2 and WLZ < -2. Children with  $\geq 50\%$  of WLZ measurements < -2 and at least 4  
987 measurements over a defined age range were classified as persistently wasted (e.g., birth to 24 months,  
988 median interval between measurements: 80 days, IQR: 62-93). Children were assumed to never recover  
989 from stunting episodes, but children were classified as recovered from wasting episodes (and at risk for  
990 a new episode of wasting) if their measured WLZ was  $\geq -2$  for at least 60 days (details in Mertens et. al  
991 (2020)).<sup>4</sup> Stunting reversal was defined as children stunted under 3 months whose final two  
992 measurements before 24 months were non-stunted. Child mortality was all-cause and was restricted to  
993 children who died after birth and before age 24 months. For child morbidity outcomes (Figure 4c),  
994 concurrent wasting and stunting prevalences at age 18 months were estimated using the  
995 anthropometry measurement taken closest to age 18 months, and within 17-19 months of age, while  
996 persistent wasting was estimated from child measurements between 6 and 24 months of age. We chose  
997 18 months to calculate concurrent wasting and stunting because it maximized the number of child  
998 observations at later ages when concurrent wasting and stunting was most prevalent, and used ages 6-  
999 24 months to define persistent wasting to maximize the number of anthropometry measurements taken  
1000 after the early growth faltering exposure measurements.<sup>4</sup>

1001

### 1002 **4. Estimating relationships between child, parental, and household exposures and measures of 1003 growth faltering**

1004

#### 1005 **4.1 Exposure definitions**

1006 We selected the exposures of interest based on variables present in multiple cohorts that  
1007 met our inclusion criteria, were found to be important predictors of stunting and wasting in

1008 prior literature and could be harmonized across cohorts for pooled analyses. Extended Data  
1009 Table 2 lists all exposures included in the analysis, as well as exposure categories used across  
1010 cohorts, and the total number of children in each category. For parental education and asset-  
1011 based household wealth, we categorized to levels relative to the distribution of educational  
1012 attainment within each cohort. Continuous biological characteristics (gestational age, birth  
1013 weight, birth height, parental weight, parental height, parental age) were classified based on a  
1014 common distribution, pooling data across cohorts. Our rationale was that the meaning of socio-  
1015 economic variables is culturally context-dependent, whereas biological variables should have a  
1016 more universal meaning.

1017

#### 1018 **4.2 Risk set definition**

1019 For exposures that occur or exist before birth, we considered the child at risk of incident  
1020 outcomes at birth. Therefore, we classified children who were born stunted (or wasted) as  
1021 incident episodes of stunting (or wasting) when estimating the relationship between household  
1022 characteristics, paternal characteristics, and child characteristics like gestational age, sex, birth  
1023 order, and birth location.

1024 For postnatal exposures (e.g., breastfeeding practices, WASH characteristics, birth weight),  
1025 we excluded episodes of stunting or wasting that occurred at birth. Children who were born  
1026 wasted could enter the risk set for postnatal exposures if they recovered from wasting during  
1027 the study period (see Mertens et al. 2020 for details).<sup>4</sup> This restriction ensured that for postnatal  
1028 exposures, the analysis only included postnatal, incident episodes. Children born or enrolled  
1029 wasted were included in the risk set for the outcome of recovery from wasting within 90 days  
1030 for all exposures (prenatal and postnatal).

1031

1032

#### 1033 **4.3 Estimating differences in outcomes across categories of exposures**

1034 We estimated measures of association between exposures and growth faltering outcomes by  
1035 comparing outcomes across categories of exposures in four ways:

1036 Mean difference of the comparison levels of the exposure on LAZ, WLZ at birth, 6 months, and  
1037 24 months. The Z-scores used were the measures taken closest to the age of interest and within  
1038 one month of the age of interest, except for Z-scores at birth which only included a child's first  
1039 measure recorded by age 7 days. We also calculated mean differences in LAZ, WAZ, weight, and  
1040 length velocities.

1041 Prevalence ratios (PR) between comparison levels of the exposure, compared to the reference  
1042 level at birth, 6 months, and 24 months. Prevalence was estimated using anthropometry  
1043 measurements closest to the age of interest and within one month of the age of interest, except  
1044 for prevalence at birth which only included measures taken on the day of birth.

1045 Cumulative incidence ratios (CIR) between comparison levels of the exposure, compared to the  
1046 reference level, for the incident onset of outcomes between birth and 24 months, 6-24 months,

1047 and birth-6 months.  
1048 Mean Z-scores by continuous age, stratified by levels of exposures, from birth to 24 months  
1049 were fit within individual cohorts using cubic splines with the bandwidth chosen to minimize the  
1050 median Akaike information criterion across cohorts.<sup>5</sup> We estimated splines separately for each  
1051 exposure category. We pooled spline curves across cohorts into a single prediction, offset by  
1052 mean Z-scores at one year, using random effects models.<sup>6</sup>

1053

#### 1054 **4.4 Estimating population attributable parameters**

1055 We estimated three measures of the population-level effect of exposures on growth faltering  
1056 outcomes:

1057 Population intervention impact (PIE), a generalization of population attributable risk, was  
1058 defined as the change in population mean Z-score if the entire population's exposure was set to  
1059 an ideal reference level. For each exposure, we chose reference levels based on prior literature  
1060 or as the category with the highest mean LAZ or WLZ across cohorts.

1061 Population attributable fraction (PAF) was defined as the proportional reduction in cumulative  
1062 incidence if the entire population's exposure was set to an ideal low risk reference level. We  
1063 estimated the PAF for the prevalence of stunting and wasting at birth, 6, and 24 months and  
1064 cumulative incidence of stunting and wasting from birth to 24 months, 6-24 months, and from  
1065 birth to 6 months. For each exposure, we chose the reference level as the category with the  
1066 lowest risk of stunting or wasting.

1067 Optimal individualized intervention impact We employed a variable importance measure (VIM)  
1068 methodology to estimate the impact of an optimal individualized intervention on an exposure.<sup>7</sup>  
1069 The optimal intervention on an exposure was determined through estimating individualized  
1070 treatment regimes, which give an individual-specific rule for the lowest-risk level of exposure  
1071 based on individuals' measured covariates. The covariates used to estimate the low-risk level  
1072 are the same as those used for the adjustment documented in section 6 below. The impact of  
1073 the optimal individualized intervention is derived from the VIM, which is the predicted change in  
1074 the population-mean outcome from the observed outcome if every child's exposure was shifted  
1075 to the optimal level. This differs from the PIE and PAF parameters in that we did not specify the  
1076 reference level; moreover, the reference level could vary across participants.

1077 PIE and PAF parameters assume a causal relationship between exposure and outcome. For some  
1078 exposures, we considered attributable effects to have a pragmatic interpretation — they  
1079 represent a summary estimate of relative importance that combines the exposure's strength of  
1080 association and its prevalence in the population.<sup>8</sup> Comparisons between optimal intervention  
1081 estimates and PIE estimates are shown in Extended Data Fig 11.

1082

### 1083 **5. Estimation approach**

#### 1084 Estimation of cohort-specific effects

1085 For each exposure, we used the directed acyclic graph (DAG) framework to identify potential

1086 confounders from the broader set of exposures used in the analysis.<sup>9</sup> We did not adjust for  
1087 characteristics that were assumed to be intermediate on the causal path between any exposure and the  
1088 outcome, because while controlling for mediators may help adjust for unmeasured confounders in some  
1089 conditions, it can also lead to collider bias.<sup>10,11</sup> Detailed lists of adjustment covariates used for each  
1090 analysis are available online (<https://child-growth.github.io/causes/dags.html>). Confounders were not  
1091 measured in every cohort, so there could be residual confounding in cohort-specific estimates.

1092 Analyses used a complete case approach that only included children with non-missing exposure  
1093 and outcome measurements. For additional covariates in adjusted analyses, we used the following  
1094 approach to impute missing covariate values.<sup>12</sup> Within each cohort, if there was <50% missingness in a  
1095 covariate, we imputed missing measurements as the median (continuous variables) or mode (categorical  
1096 variables) among all children, and analyses included an indicator variable for missingness in the  
1097 adjustment set. Covariates with >50% missingness were excluded from the potential adjustment set.  
1098 When calculating the median for imputation, we used children as independent units rather than  
1099 measurements so that children with more frequent measurements were not over-represented.

1100 Unadjusted PRs and CIRs between the reference level of each exposure and comparison levels  
1101 were estimated using logistic regressions.<sup>13</sup> Unadjusted mean differences for continuous outcomes were  
1102 estimated using linear regressions.

1103 To flexibly adjust for potential confounders and reduce the risk of model misspecification, we  
1104 estimated adjusted PRs, CIRs, and mean differences using targeted maximum likelihood estimation  
1105 (TMLE), a two-stage estimation strategy that incorporates state-of-the-art machine learning algorithms  
1106 (super learner) while still providing valid statistical inference.<sup>14,15</sup> The effects of covariate adjustment on  
1107 estimates compared to unadjusted estimates is shown in Extended Data Fig 12, and E-values, summary  
1108 measures of the strength of unmeasured confounding needed to explain away observed significant  
1109 associations, are plotted in Extended Data Fig 13.<sup>16</sup> The super learner is an ensemble machine learning  
1110 method that uses cross-validation to select a weighted combination of predictions from a library of  
1111 algorithms.<sup>17</sup> We included in the library simple means, generalized linear models, LASSO penalized  
1112 regressions,<sup>18</sup> generalized additive models,<sup>19</sup> and gradient boosting machines.<sup>20</sup> The super learner was fit  
1113 to maximize the 10-fold cross-validated area under the receiver operator curve (AUC) for binomial  
1114 outcomes, and minimize the 10-fold cross-validated mean-squared error (MSE) for continuous  
1115 outcomes. That is, the super learner was fit using 9/10 of the data, while the AUC/MSE was calculated  
1116 on the remaining 1/10 of the data. Each fold of the data was held out in turn and the cross-validated  
1117 performance measure was calculated as the average of the performance measures across the ten folds.  
1118 This approach is practically appealing and robust in finite samples, since this cross-validation procedure  
1119 utilizes unseen sample data to measure the estimator's performance. Also, the super learner is  
1120 asymptotically optimal in the sense that it is guaranteed to outperform the best possible algorithm  
1121 included in the library as sample size grows. The initial estimator obtained via super learner is  
1122 subsequently updated to yield an efficient double-robust semi-parametric substitution estimator of the  
1123 parameter of interest.<sup>14</sup> To estimate the  $R^2$  of models including multiple exposures, we fit super learner  
1124 models, without the targeted learning step, and within each cohort measuring the exposures. We then  
1125 pooled cohort-specific  $R^2$  estimates using fixed effects models.



1126 We estimated influence curve-based, clustered standard errors to account for repeated  
1127 measures in the analyses of recovery from wasting or progression to severe wasting. We assumed that  
1128 the children were the independent units of analysis unless the original study had a clustered design, in  
1129 which case the unit of independence in the original study were used as the unit of clustering. We used  
1130 clusters as the unit of independence for the iLiNS-Zinc, Jivita-3, Jivita-4, Probit, and SAS Complementary  
1131 Feeding trials. We estimated 95% confidence intervals for incidence using the normal approximation.

1132 Mortality analyses estimated hazard ratios using Cox proportional hazards models with a child's  
1133 age in days as the timescale, adjusting for potential confounders, with the growth faltering exposure  
1134 status updated at each follow-up that preceded death or censoring by age 24 months. Growth faltering  
1135 exposures included moderate (between  $-2 Z$  and  $-3 Z$ ) wasting, stunting, and underweight, severe  
1136 (below  $-3 Z$ ) wasting, stunting, and underweight, and combinations of concurrent wasting, stunting, and  
1137 underweight. Growth faltering categories were mutually exclusive within moderate or severe  
1138 classifications, so children were classified as only wasted, only stunted, or only underweight, or some  
1139 combination of these categories. We estimated the hazard ratio associated with different  
1140 anthropometric measures of CGF in separate analyses, considering each as an exposure in turn with the  
1141 reference group defined as children without the deficit. For children who did not die, we defined their  
1142 censoring date as the administrative end of follow-up in their cohort, or age 24 months (730 days),  
1143 whichever occurred first. Because mortality was a rare outcome, estimates are adjusted only for child  
1144 sex and trial treatment arm. To avoid reverse causality, we did not include child growth measures  
1145 occurring within 7 days of death. Extended Data Table 3 lists the cohorts used in the mortality analysis,  
1146 the number of deaths in each cohort, and a comparison to country-level infant mortality rates.

1147  
1148 Data sparsity

1149 We did not estimate relative risks between a higher level of exposure and the reference group if there  
1150 were 5 or fewer cases in either stratum. In such cases, we still estimated relative risks between other  
1151 exposure strata and the reference strata if those strata were not sparse. For rare outcomes, we only  
1152 included one covariate for every 10 observations in the sparsest combination of the exposure and  
1153 outcome, choosing covariates based on ranked deviance ratios.

## 1154 1155 **6. Pooling parameters**

1156 We pooled adjusted estimates from individual cohorts using random effects models, fit using restricted  
1157 maximum likelihood estimation. The pooling methods are detailed in Benjamin-Chung (2020).<sup>1</sup> All  
1158 parameters were pooled directly using the cohort-specific estimates of the same parameter, except for  
1159 population attributable fractions. Pooled PAFs were calculated from random-effects pooled population  
1160 intervention impacts (PIEs), and pooled outcome prevalence in the population using the following  
1161 formulas:<sup>21</sup>

$$1162 \quad PAF = \frac{PIE}{Outcome\ prevalence} \times 100 \quad (1)$$

$$1164 \quad PAF \ 95\%CI = \frac{PIE \ 95\% \ CI}{Outcome \ prevalence} \times 100 \quad (2)$$

1165

1166 For PAFs of exposures on the cumulative incidence of wasting and stunting, the pooled cumulative  
1167 incidence was substituted for the outcome prevalence in the above equations. We used this method  
1168 instead of direct pooling of PAFs because, unlike PAFs, PIEs are unbounded with symmetrical confidence  
1169 intervals.

1170 For figures 3a-c, mean trajectories estimated using cubic splines in individual studies and then  
1171 curves were pooled using random effects.<sup>6</sup> Curves estimated from all anthropometry measurements of  
1172 children taken from birth to 24 months of age within studies that measured the measure of maternal  
1173 anthropometry.

1174

## 1175 **7. Sensitivity analyses**

1176 We compared estimates pooled using random effects models, which are more conservative in the  
1177 presence of heterogeneity across studies, with estimates pooled using fixed effects, and we compared  
1178 adjusted estimates with estimates unadjusted for potential confounders. We estimated associations  
1179 between growth faltering and mortality at different ages, after dropping the trials measuring children  
1180 less frequently than quarterly, and using TMLE instead of Cox proportional hazard models, and we  
1181 plotted Kaplan Meier curves of child mortality, stratified by measures of early growth faltering. We also  
1182 conducted a sensitivity analysis on methods of pooling splines of child growth trajectories, stratified by  
1183 maternal anthropometry. We re-estimated the attributable differences of exposures on WLZ and LAZ at  
1184 24 months, dropping the PROBIT trial, the only European study. Results from secondary outcomes and  
1185 sensitivity analyses are viewable online at <https://child-growth.github.io/causes>.

1186

## 1187 **Data and code availability**

1188 The data that support the findings of this study are available from the Bill & Melinda Gates Foundation  
1189 Knowledge Integration project upon reasonable request. Replication scripts for this analysis are  
1190 available here: <https://osf.io/9xyqv/>.

1191

1192

## 1193 **Methods References**

- 1194 1. WHO | The WHO Child Growth Standards. *WHO* <http://www.who.int/childgrowth/en/>.
- 1195 2. Organization, W. H. & Fund (UNICEF), U. N. C. *Recommendations for data collection, analysis and*  
1196 *reporting on anthropometric indicators in children under 5 years old.* (World Health Organization,  
1197 2019).
- 1198 3. Benjamin-Chung, J. et. al. (submitted). Early childhood linear growth faltering in low-and middle-  
1199 income countries. (2020).
- 1200 4. Mertens, A. et al. (submitted). Child wasting and concurrent stunting in low- and middle-income  
1201 countries. (2020).
- 1202 5. Wood, S. N., Pya, N. & Säfken, B. Smoothing Parameter and Model Selection for General Smooth  
1203 Models. *J. Am. Stat. Assoc.* **111**, 1548–1563 (2016).

- 1204 6. Gasparrini, A., Armstrong, B. & Kenward, M. G. Multivariate meta-analysis for non-linear and other  
1205 multi-parameter associations. *Stat. Med.* **31**, 3821–3839 (2012).
- 1206 7. Luedtke, A. R. & van der Laan, M. J. Super-Learning of an Optimal Dynamic Treatment Rule. *Int. J.*  
1207 *Biostat.* **12**, 305–332 (2016).
- 1208 8. Jewell, N. P. *Statistics for epidemiology*. (Boca Raton: Chapman & Hall/CRC., 2004).
- 1209 9. Greenland, S., Robins, J. M. & Pearl, J. Confounding and Collapsibility in Causal Inference. *Stat. Sci.*  
1210 **14**, 29–46 (1999).
- 1211 10. VanderWeele, T. J. & Shpitser, I. A new criterion for confounder selection. *Biometrics* **67**, 1406–1413  
1212 (2011).
- 1213 11. Groenwold, R. H. H., Palmer, T. M. & Tilling, K. To Adjust or Not to Adjust? When a “Confounder” Is  
1214 Only Measured After Exposure. *Epidemiol. Camb. Mass* **32**, 194–201 (2021).
- 1215 12. Stuart, E. A. Matching methods for causal inference: A review and a look forward. *Stat. Sci. Rev. J.*  
1216 *Inst. Math. Stat.* **25**, 1 (2010).
- 1217 13. McNutt, L.-A., Wu, C., Xue, X. & Hafner, J. P. Estimating the relative risk in cohort studies and clinical  
1218 trials of common outcomes. *Am. J. Epidemiol.* **157**, 940–943 (2003).
- 1219 14. Gruber, S. & Laan, M. van der. Targeted Maximum Likelihood Estimation: A Gentle Introduction. *UC*  
1220 *Berkeley Div. Biostat. Work. Pap. Ser.* (2009).
- 1221 15. Laan, M. J. van der & Rose, S. *Targeted Learning: Causal Inference for Observational and*  
1222 *Experimental Data*. (Springer-Verlag, 2011).
- 1223 16. VanderWeele, T. J. & Ding, P. Sensitivity Analysis in Observational Research: Introducing the E-  
1224 Value. *Ann. Intern. Med.* **167**, 268 (2017).
- 1225 17. van der Laan, M., Polley, E. & Hubbard, A. Super Learner. *UC Berkeley Div. Biostat. Work. Pap. Ser.*  
1226 (2007).
- 1227 18. Tibshirani, R. Regression Shrinkage and Selection via the Lasso. *J. R. Stat. Soc. Ser. B Methodol.*  
1228 **58**, 267–288 (1996).
- 1229 19. Hastie, T. & Tibshirani, R. Generalized Additive Models. *Stat. Sci.* **1**, 297–310 (1986).
- 1230 20. Chen, T. & Guestrin, C. XGBoost: A Scalable Tree Boosting System. *Proc. 22nd ACM SIGKDD Int.*  
1231 *Conf. Knowl. Discov. Data Min. - KDD 16* 785–794 (2016) doi:10.1145/2939672.2939785.
- 1232 21. Population attributable risk (PAR). in *Encyclopedia of Public Health* (ed. Kirch, W.) 1117–1118  
1233 (Springer Netherlands, 2008). doi:10.1007/978-1-4020-5614-7\_2685.

1234

## 1235 Acknowledgments

1236 This research was financially supported by a global development grant (OPP1165144)  
1237 from the Bill & Melinda Gates Foundation to the University of California, Berkeley, CA,  
1238 USA. We would also like to thank the following collaborators on the included cohorts  
1239 and trials for their contributions to study planning, data collection, and analysis:  
1240 Muhammad Sharif, Sajjad Kerio, Ms. Urosa, Ms. Alveen, Shahneel Hussain, Vikas  
1241 Paudel (Mother and Infant Research Activities), Anthony Costello (University College  
1242 London), Noel Rouamba, Jean-Bosco Ouédraogo, Leah Prince, Stephen A Vosti,  
1243 Benjamin Torun, Lindsey M Locks, Christine M McDonald, Roland Kupka, Ronald J  
1244 Bosch, Rodrick Kisenge, Said Aboud, Molin Wang, Azaduzzaman, Abu Ahmed  
1245 Shamim, Rezaul Haque, Rolf Klemm, Sucheta Mehra, Maithilee Mitra, Kerry Schulze,  
1246 Sunita Taneja, Brinda Nayyar, Vandana Suri, Poonam Khokhar, Brinda Nayyar,  
1247 Poonam Khokhar, Jon E Rohde, Tivendra Kumar, Jose Martines, Maharaj K Bhan, and  
1248 all other members of the study staffs and field teams. We would also like to thank all  
1249 study participants and their families for their important contributions. We are grateful to  
1250 the LCNI5 and iLiNS research teams, participants and people of Lungwena, Namwera,

1251 Mangochi and Malindi, our research assistants for their positive attitude, support, and  
1252 help in all stages of the studies.

1253

### 1254 Author contributions

1255 Conceptualization: A.M., J.B., J.M.C., K.H.B., P.C., B.F.A

1256 Funding Acquisition: J.M.C., A.E.H., M.J.V., B.F.A.

1257 Data curation: A.M., J.B., J.C., O.S., W.C., A.N., N.N.P., W.J., E.C, E.O.C., S.D., N.H.,  
1258 I.M., H.L., R.H., V.S., J.H., T.N.

1259 Formal analyses: A.M., J.B., J.C., O.S., W.C., A.N., N.N.P., W.J., E.C, E.O.C., S.D.,  
1260 N.H., I.M., H.L., V.S., B.F.A

1261 Methodology: A.M., J.B., J.M.C, J.C., O.S., N.H., I.M., A.E.H., M.J.V.,K.H.B., P.C.,  
1262 B.F.A.

1263 Visualization: A.M.,J.B., A.N., N.N.P., S.D., A.S., E.C, J.C., R.H., K.H.B., P.C., B.F.A.

1264 Writing – Original Draft Preparation: A.M., J.B., B.F.A.

1265 Writing – Review & Editing: A.M., J.B., J.M.C., K.H.B., P.C., B.F.A., *ki* Child Growth  
1266 Consortium members

1267

### 1268 Competing interest declaration

1269 Thea Norman is an employee of the Bill & Melinda Gates Foundation (BMGF). Kenneth  
1270 H Brown and Parul Christian are former employees of BMGF. Jeremy Coyle, Vishak  
1271 Subramoney, Ryan Hafen, and Jonas Häggström work as research contractors funded  
1272 by the BMGF.

1273

### 1274 Additional information

1275 Supplementary Information is available for this paper at [https://child-  
1276 growth.github.io/causes](https://child-growth.github.io/causes).

1277

1278 Correspondence and requests for materials should be addressed to Andrew Mertens  
1279 ([amertens@berkeley.edu](mailto:amertens@berkeley.edu)) and Benjamin F. Arnold ([ben.arnold@ucsf.edu](mailto:ben.arnold@ucsf.edu)).

1280
